# Supplementary material for: Kinetic Resolution of β-Alkyl Phenylethylamine Derivatives through Palladium-Catalyzed, Nosylamide-Directed C−H Olefination
Source: MDPI journal article supplement (doi:10.3390/molecules28041852), 2023-02-15
Supplement: s1 [file s1]

## Table of Contents

1. Figure S1 to Figure S22 The  $^1\text{H}$  spectrum and  $^{13}\text{C}$  spectrum of **rac-1a** and **rac-1o-x**.
2. Figure S23 to Figure S68 The  $^1\text{H}$  spectrum and  $^{13}\text{C}$  spectrum of **2a-x**.
3. Figure S69 to Figure S75 The  $^1\text{H}$  spectrum and  $^{13}\text{C}$  spectrum of **3**, **5**, **6** and **7**.
4. Figure S76 and Figure S77 The HPLC data of **1a** and **2a** of entry 6 in Table 1.
5. Figure S78 to Figure S103 The HPLC Data of **1ab-an** and **2b-n** in Scheme 1.
6. Figure S104 to Figure S123 The HPLC Data of **1o-x** and **2o-x** in Scheme 2.
7. Figure S124 to Figure S126 The HPLC data of **3**, **1v** and **4** in Scheme 3.

### 1 The $^1\text{H}$ spectrum and $^{13}\text{C}$ spectrum of **rac-1a** and **rac-1o-x**.

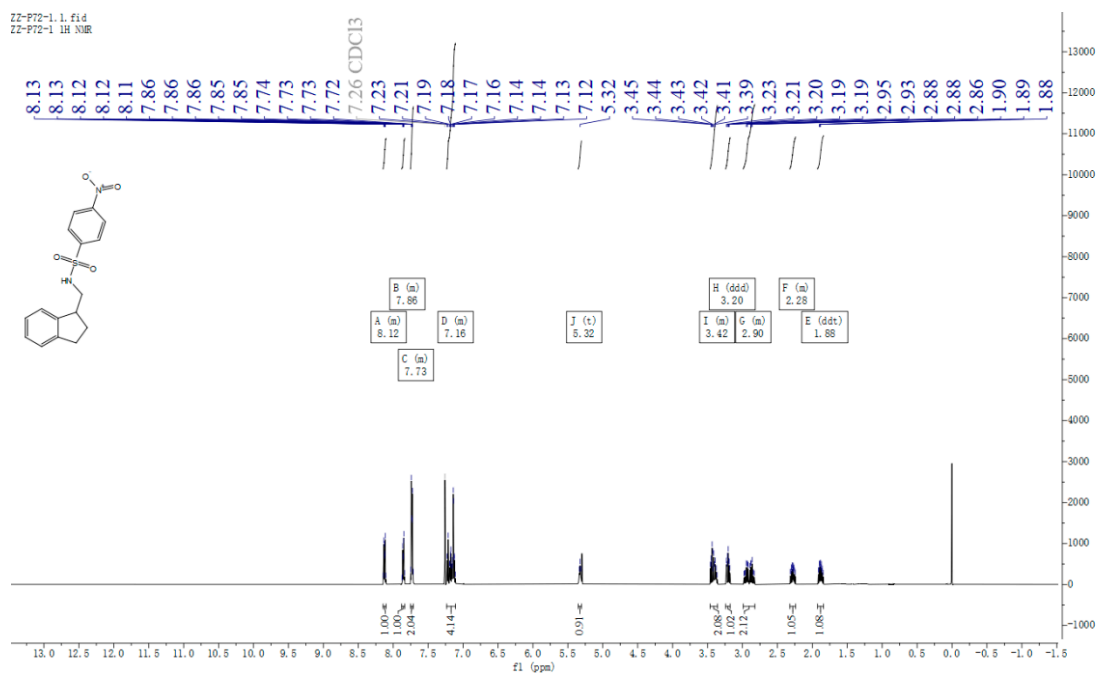

**Figure S1.** The  $^1\text{H}$  spectrum (500MHz, CDCl<sub>3</sub>) of **rac-1a**.

ZZ-P72-1.2.fid  
ZZ-P72-1 C13 NMR

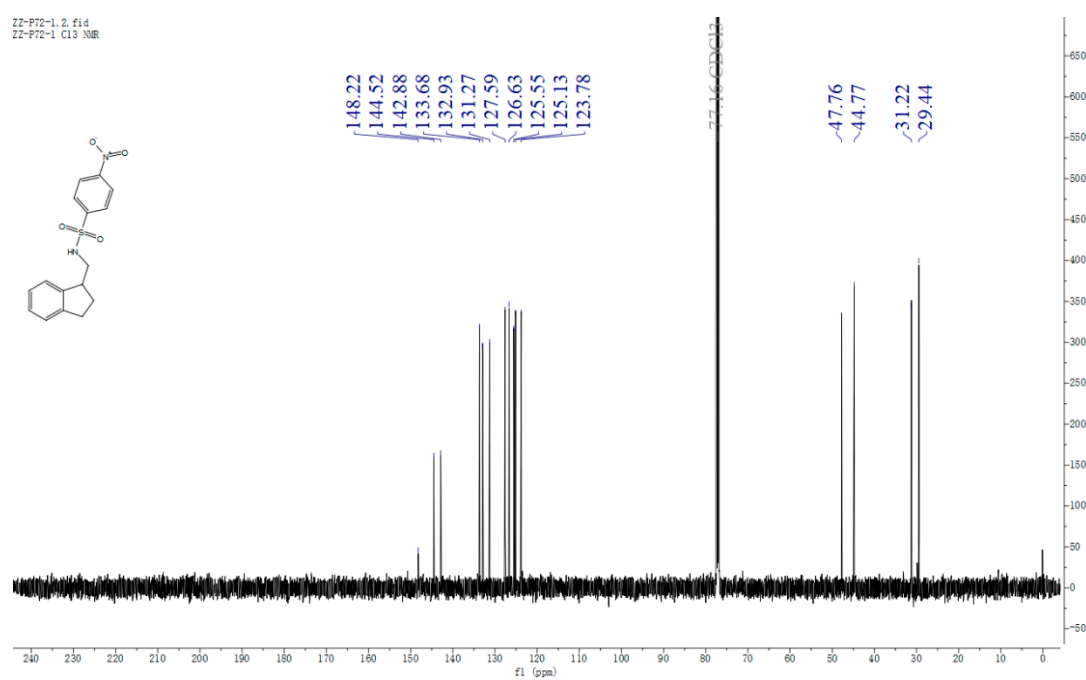

**Figure S2.** The <sup>13</sup>C spectrum (126MHz, CDCl<sub>3</sub>) of **rac-1a**.

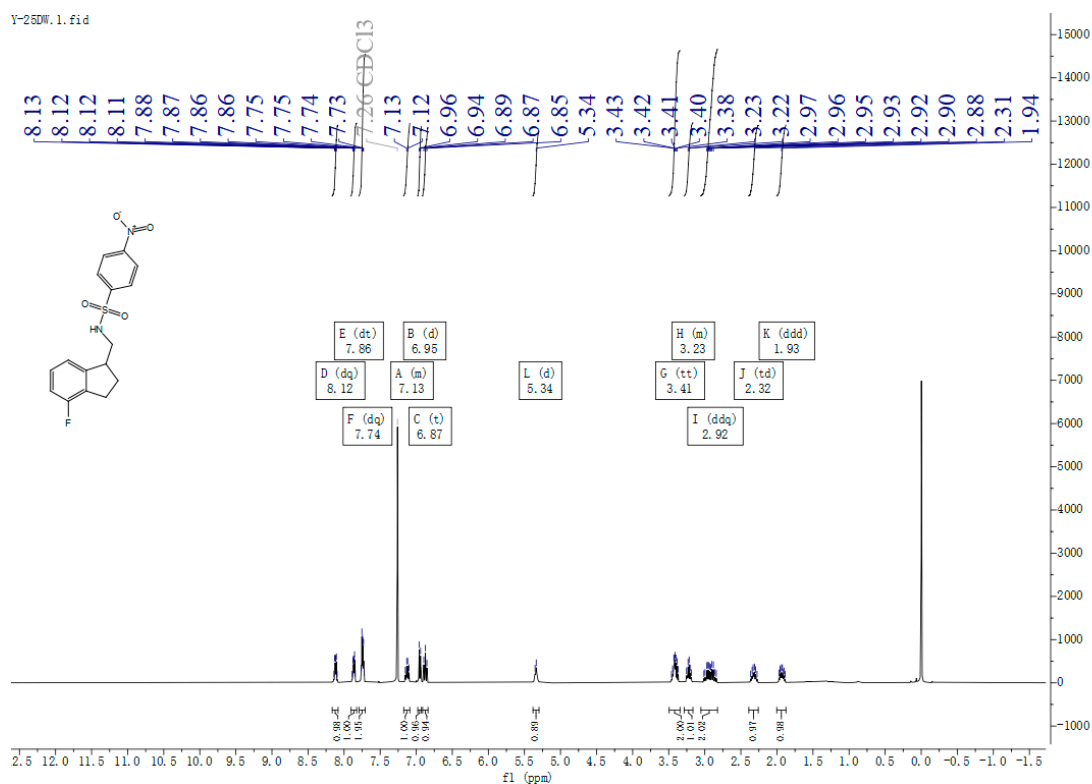

**Figure S3.** The  $^1\text{H}$  spectrum (400MHz,  $\text{CDCl}_3$ ) of *rac-10*.

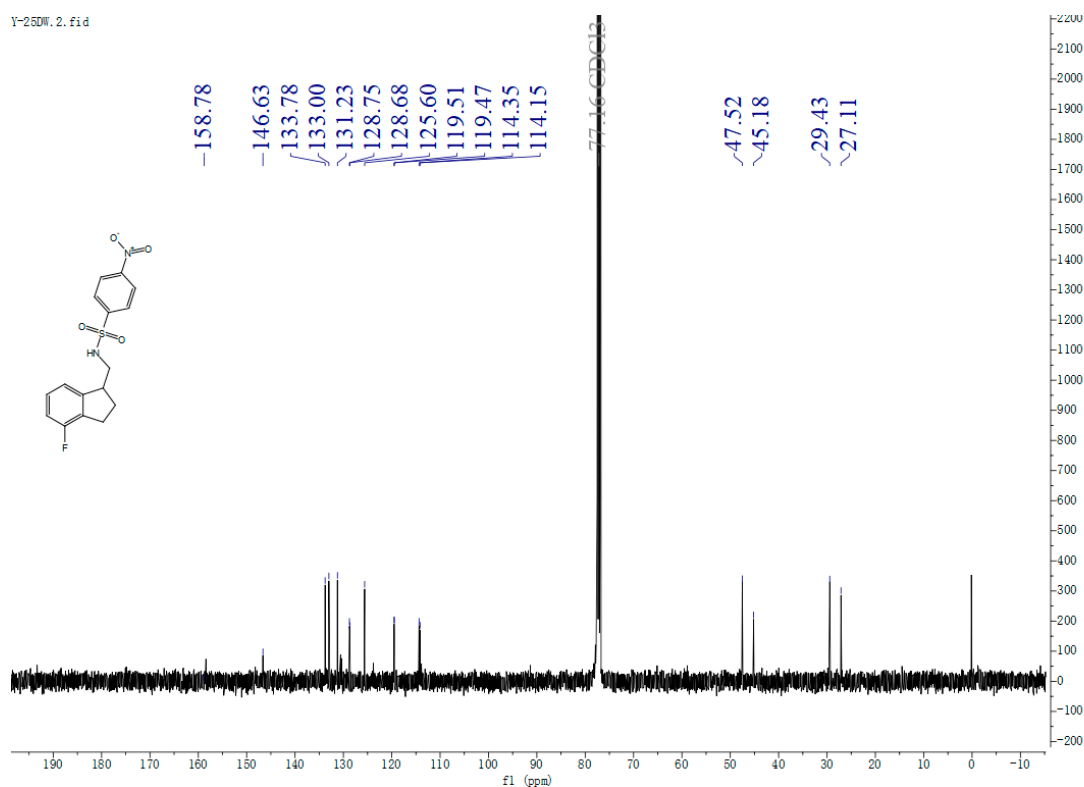

**Figure S4.** The  $^{13}\text{C}$  spectrum (101MHz,  $\text{CDCl}_3$ ) of *rac-10*.

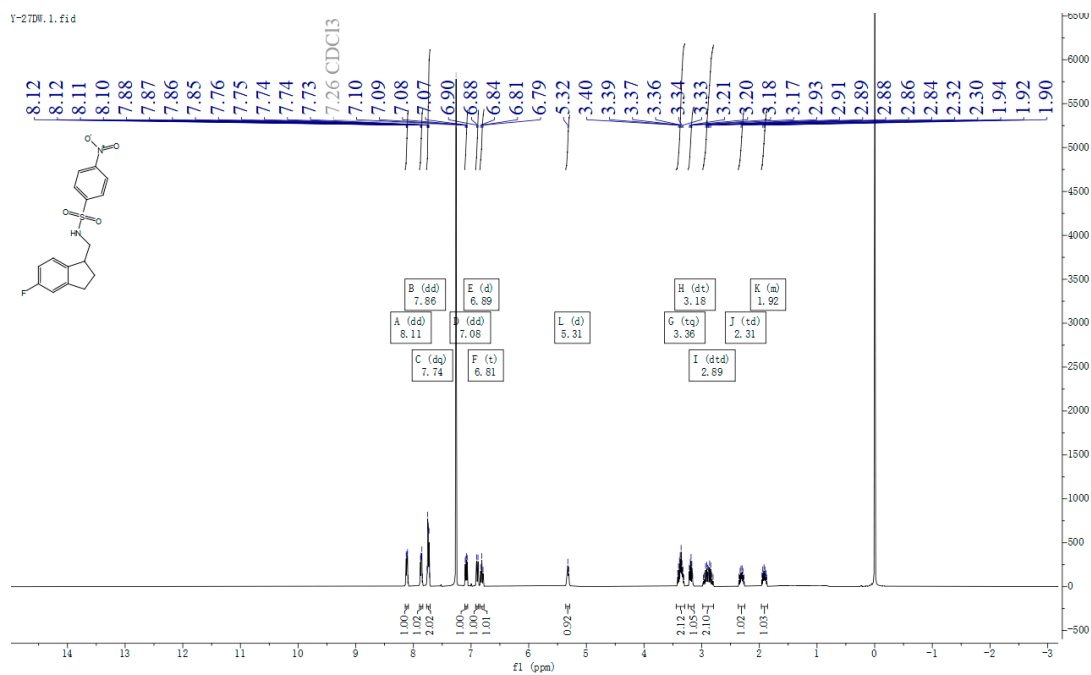

**Figure S5.** The <sup>1</sup>H spectrum (400MHz, CDCl<sub>3</sub>) of *rac-1p*.

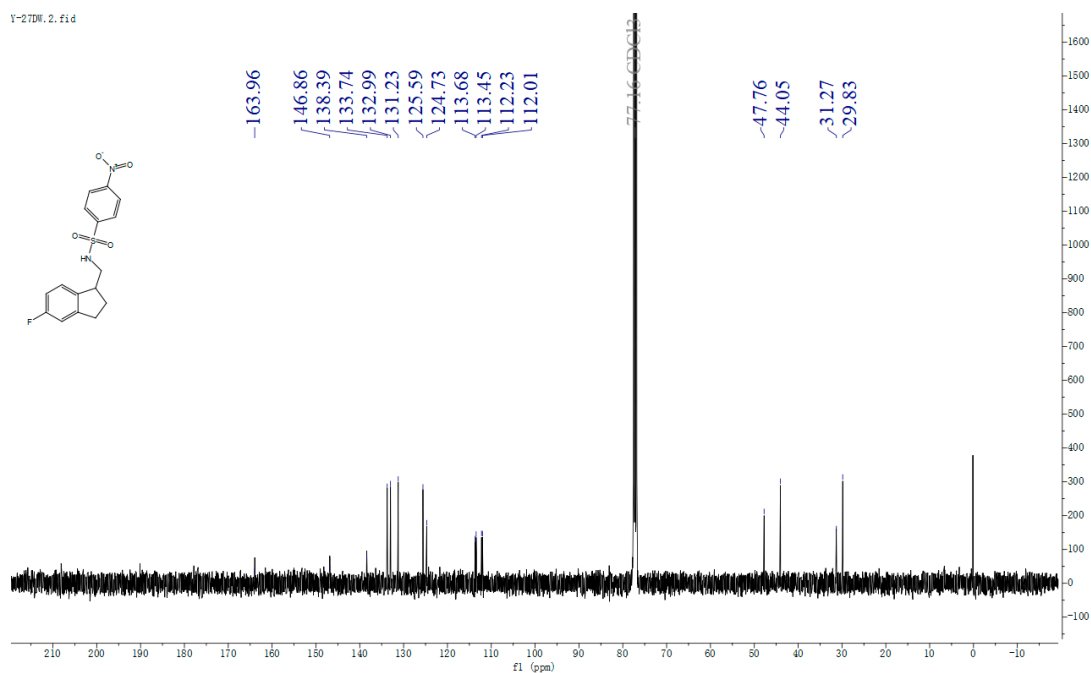

**Figure S6.** The <sup>13</sup>C spectrum (101MHz, CDCl<sub>3</sub>) of *rac-1p*.



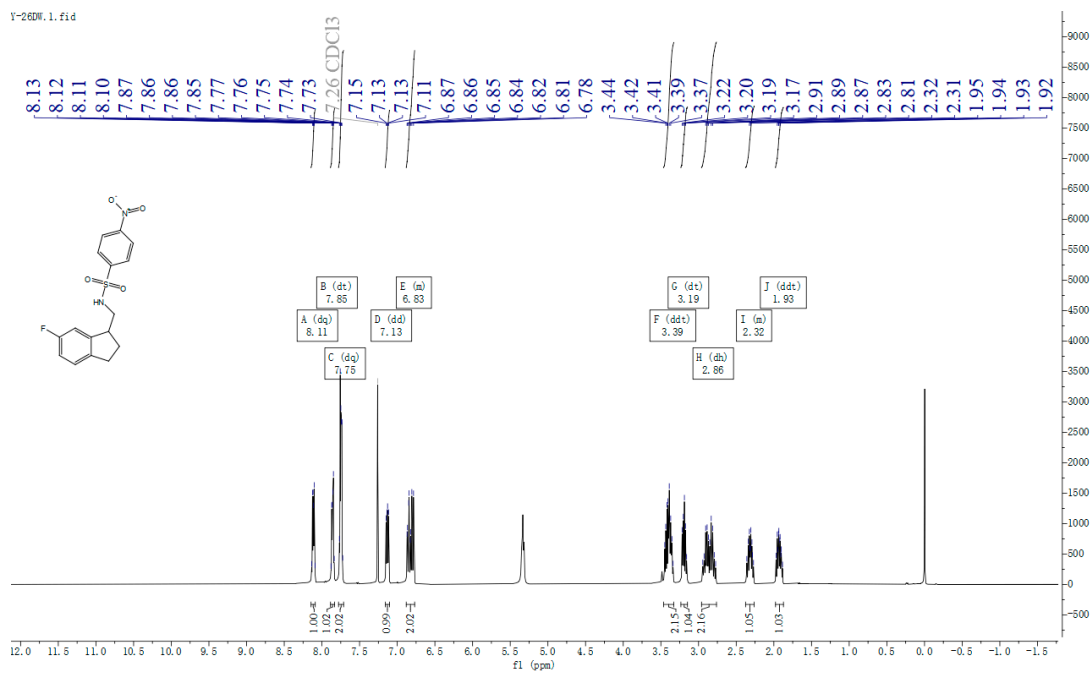

**Figure S7.** The <sup>1</sup>H spectrum (400MHz, CDCl<sub>3</sub>) of *rac-1q*.

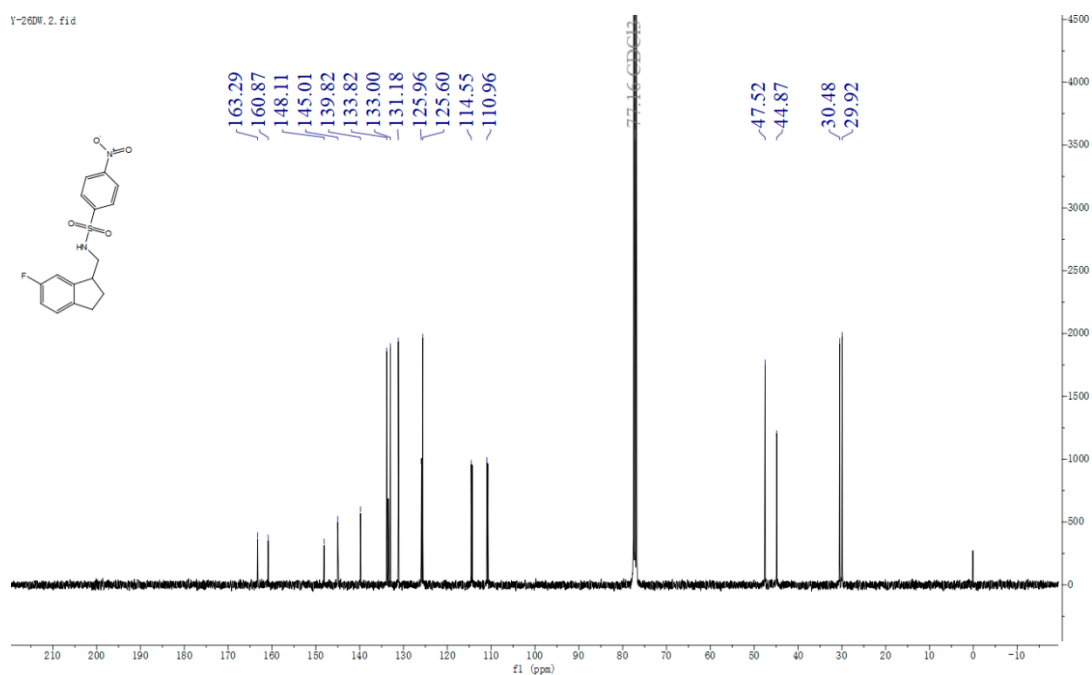

**Figure S8.** The <sup>13</sup>C spectrum (101MHz, CDCl<sub>3</sub>) of *rac-1q*.

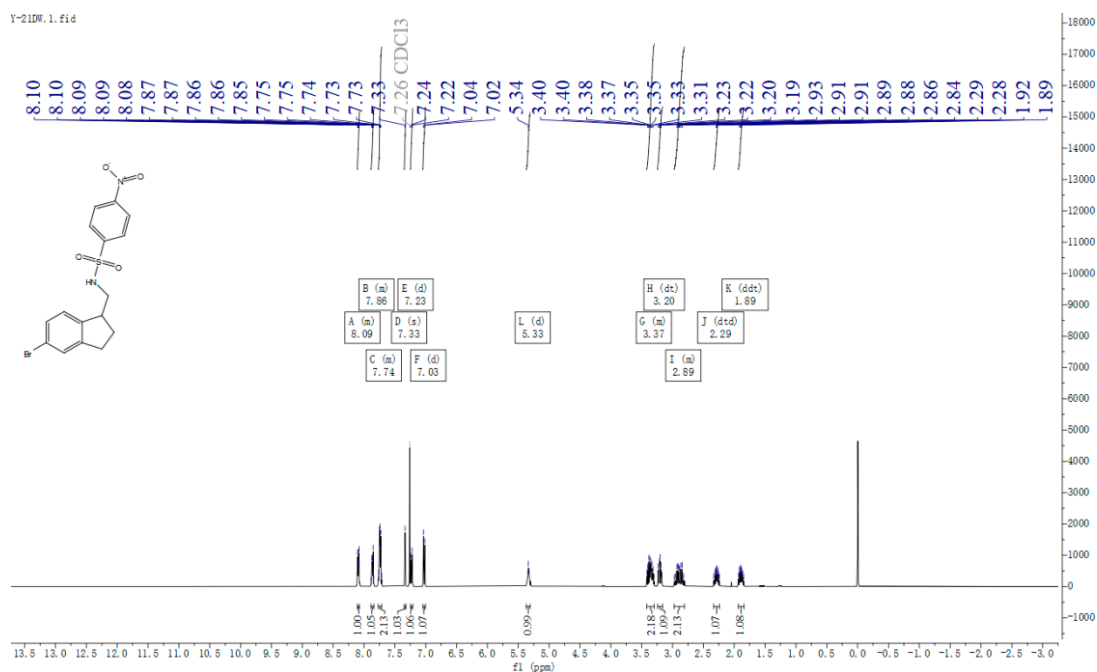

**Figure S9.** The <sup>1</sup>H spectrum (400MHz, CDCl<sub>3</sub>) of **rac-1r**.

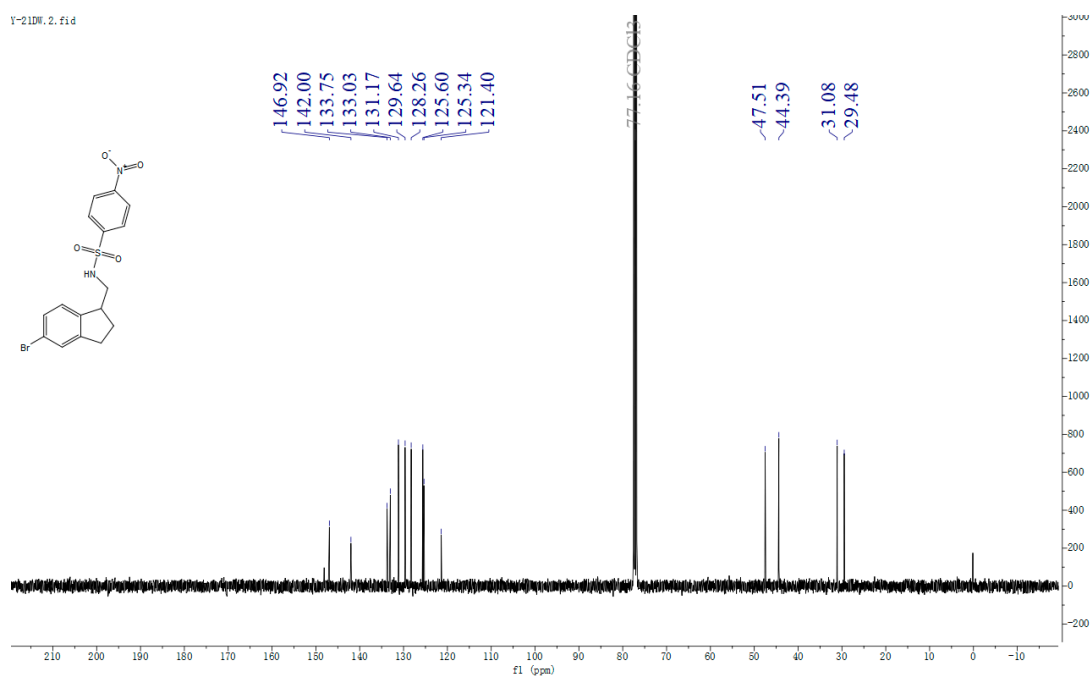

**Figure S10.** The <sup>13</sup>C spectrum (101MHz, CDCl<sub>3</sub>) of **rac-1r**.

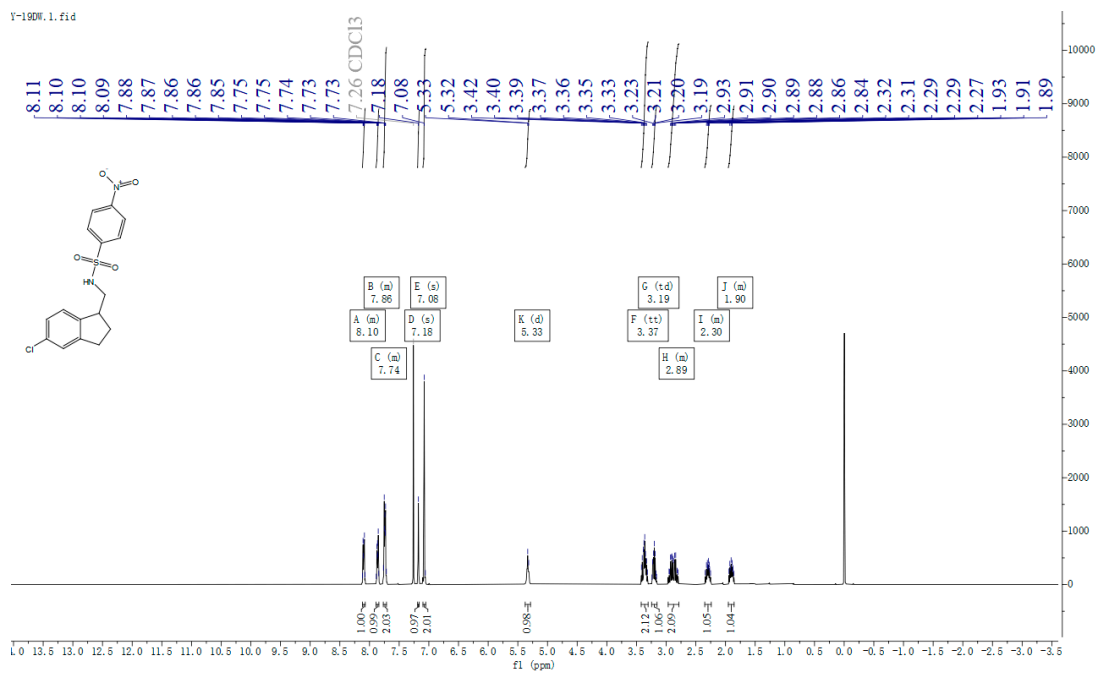

**Figure S11.** The  $^1\text{H}$  spectrum (400MHz,  $\text{CDCl}_3$ ) of **rac-1s**.

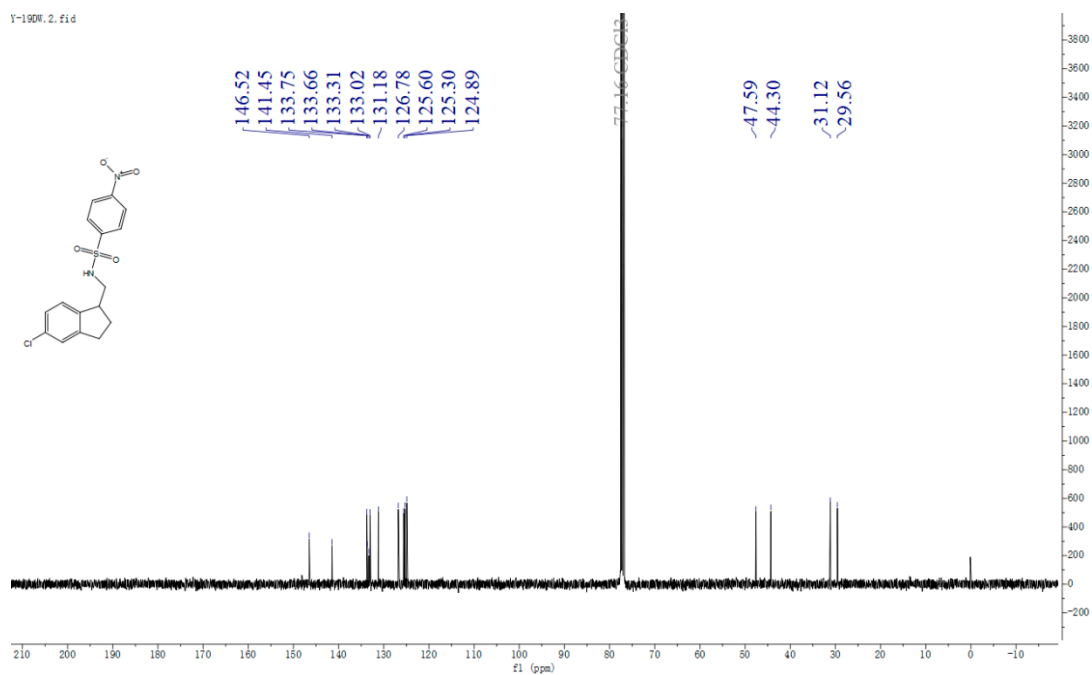

**Figure S12.** The  $^{13}\text{C}$  spectrum (101MHz,  $\text{CDCl}_3$ ) of **rac-1s**.

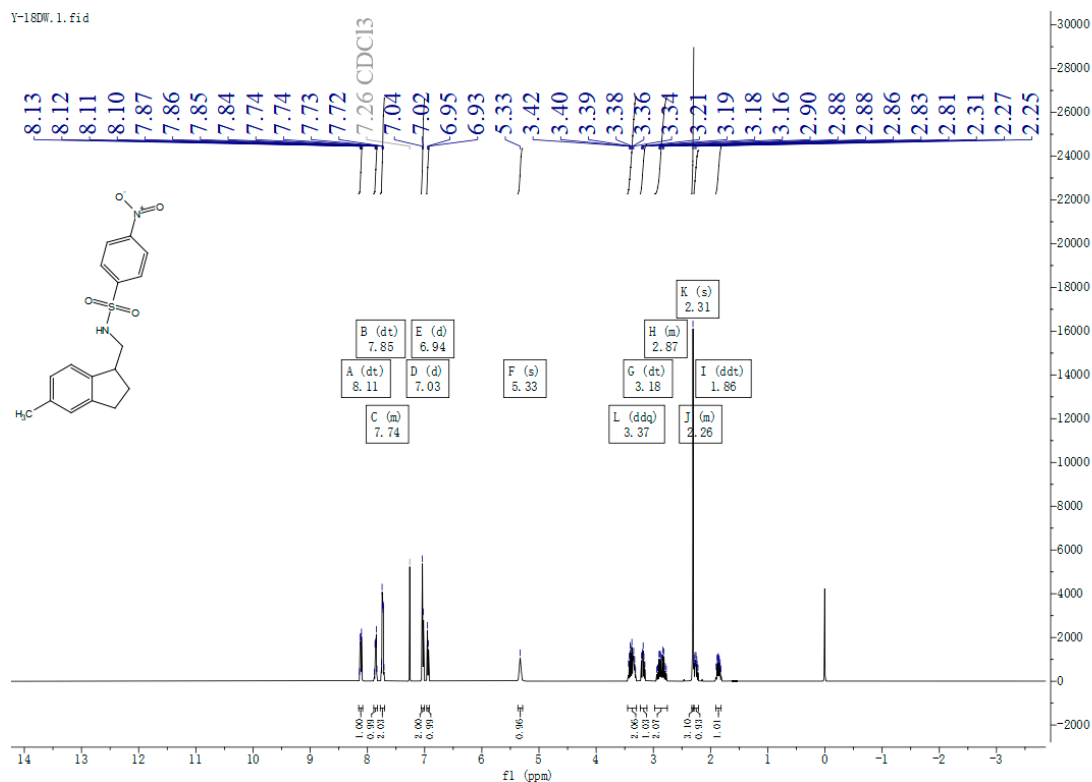

**Figure S13.** The <sup>1</sup>H spectrum (400MHz, CDCl<sub>3</sub>) of *rac-1t*.

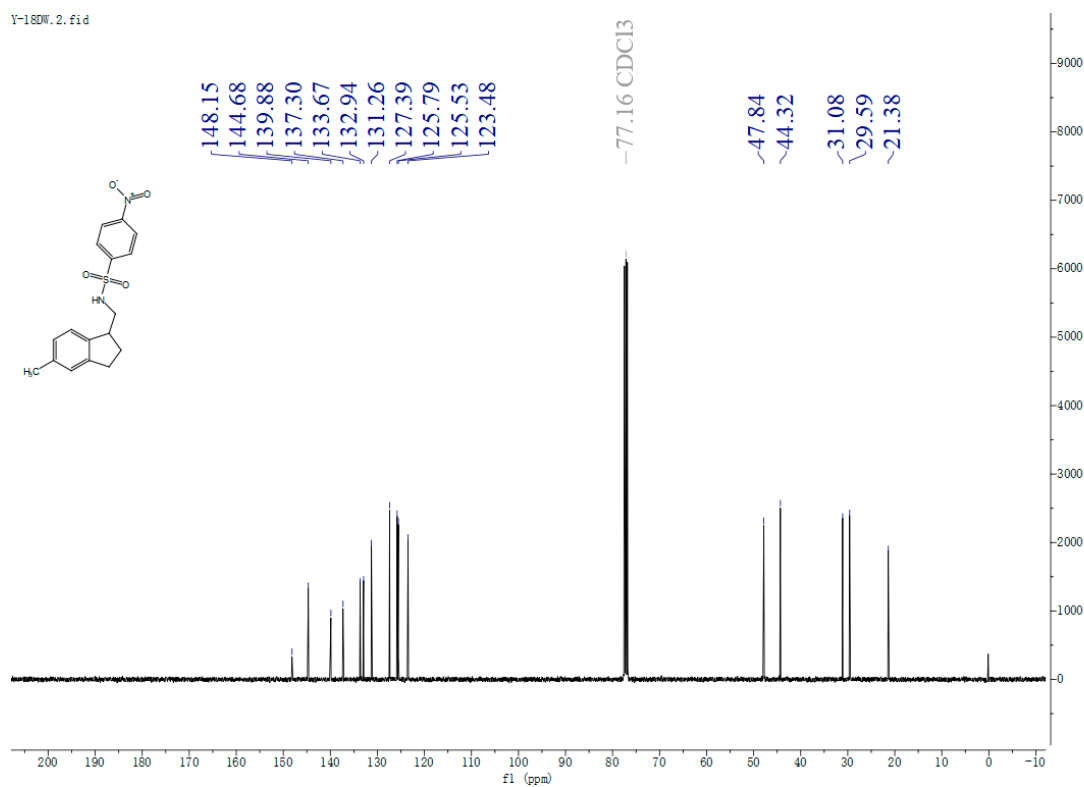

**Figure S14.** The <sup>13</sup>C spectrum (101MHz, CDCl<sub>3</sub>) of *rac-1t*.

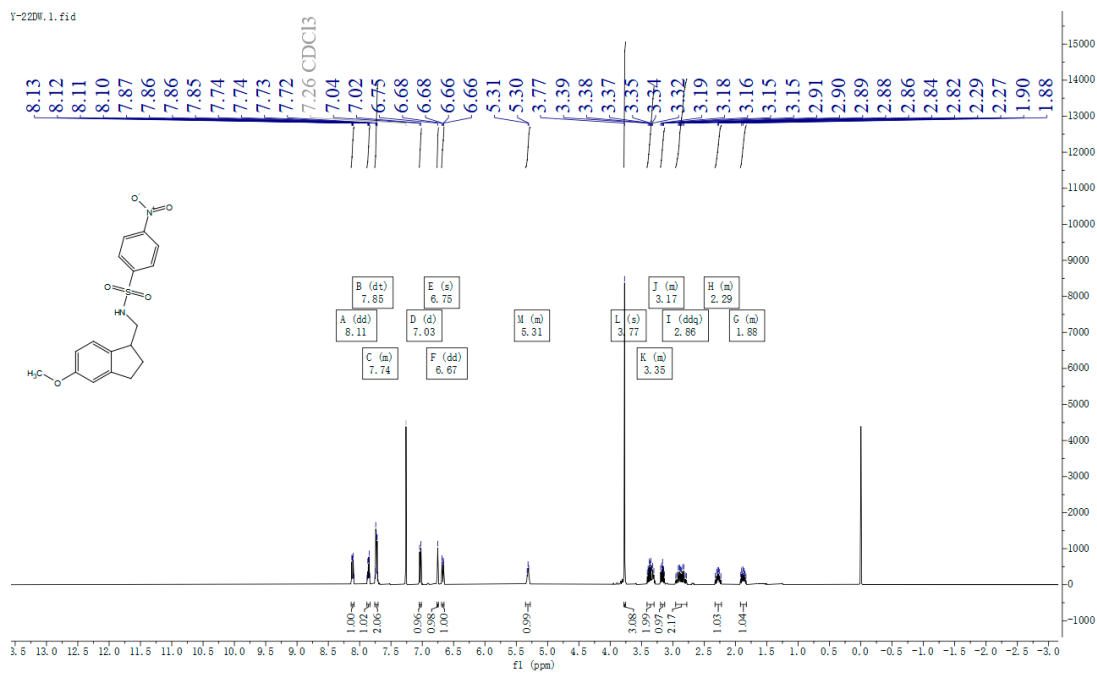

**Figure S15.** The <sup>1</sup>H spectrum (400MHz, CDCl<sub>3</sub>) of **rac-1u**.

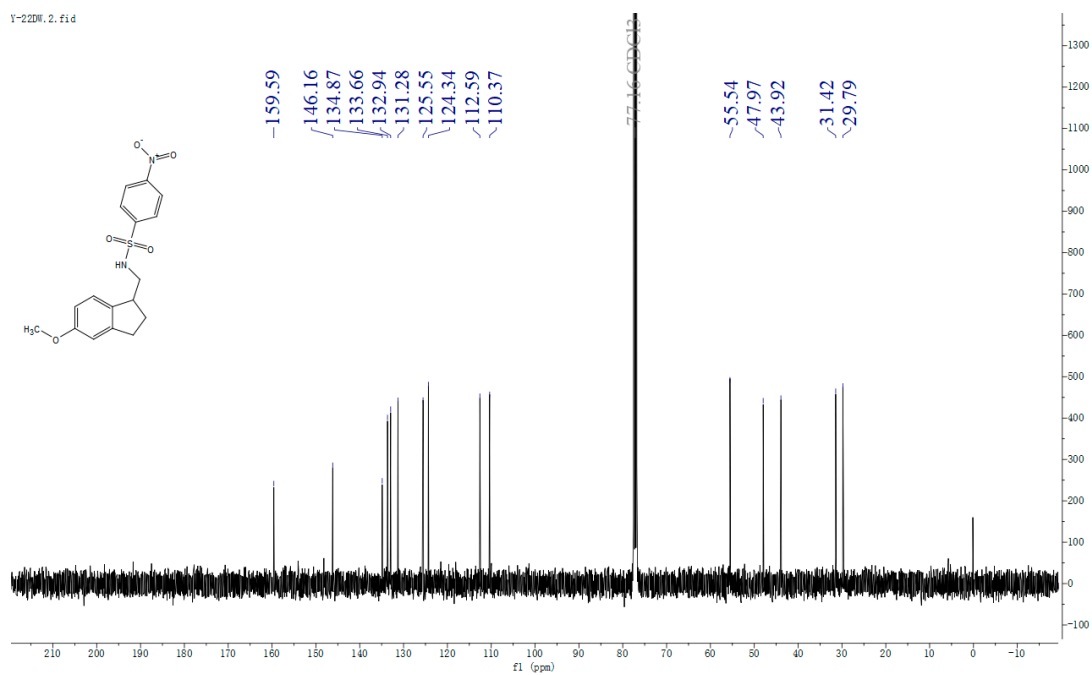

**Figure S16.** The <sup>13</sup>C spectrum (101MHz, CDCl<sub>3</sub>) of **rac-1u**.

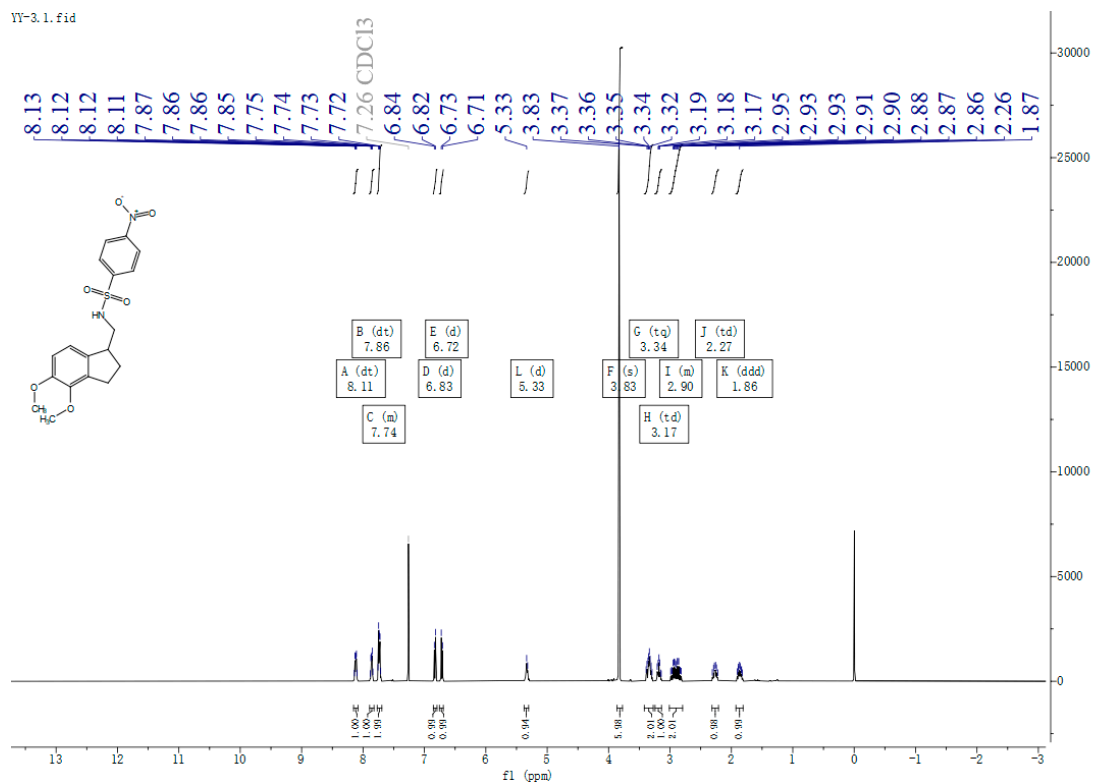

**Figure S17.** The <sup>1</sup>H spectrum (400MHz, CDCl<sub>3</sub>) of *rac-1v*.

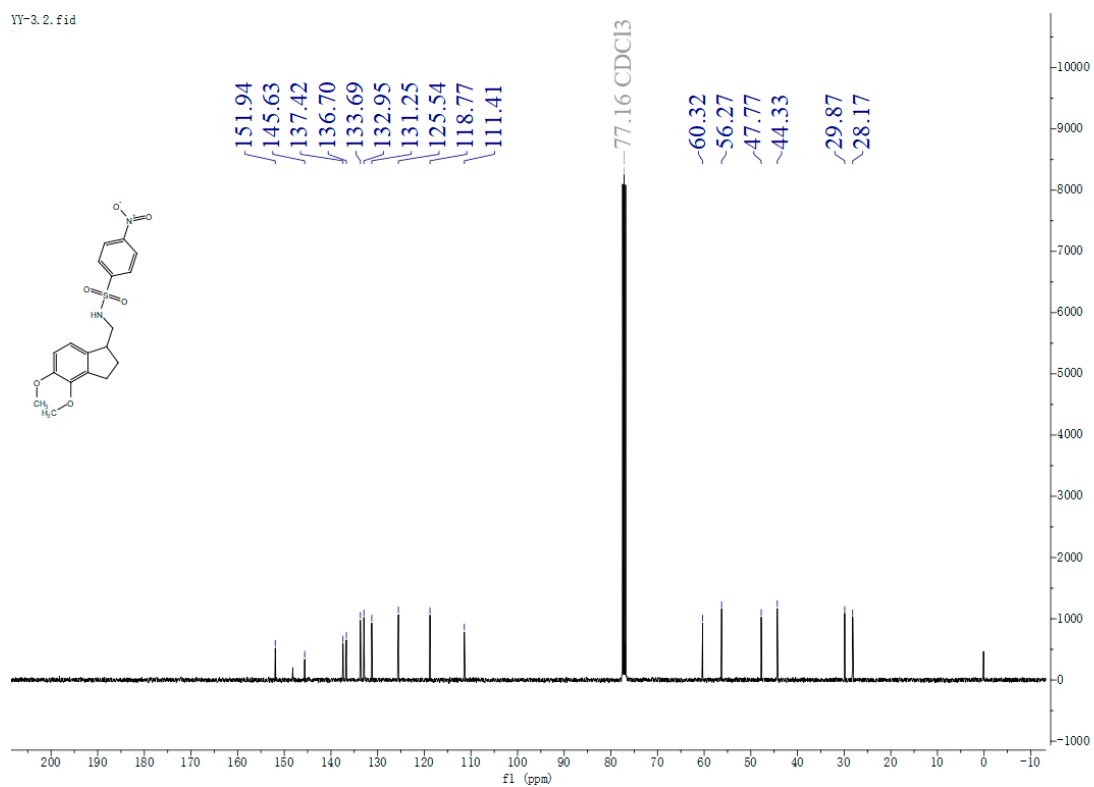

**Figure S18.** The <sup>13</sup>C spectrum (101MHz, CDCl<sub>3</sub>) of *rac-1v*.

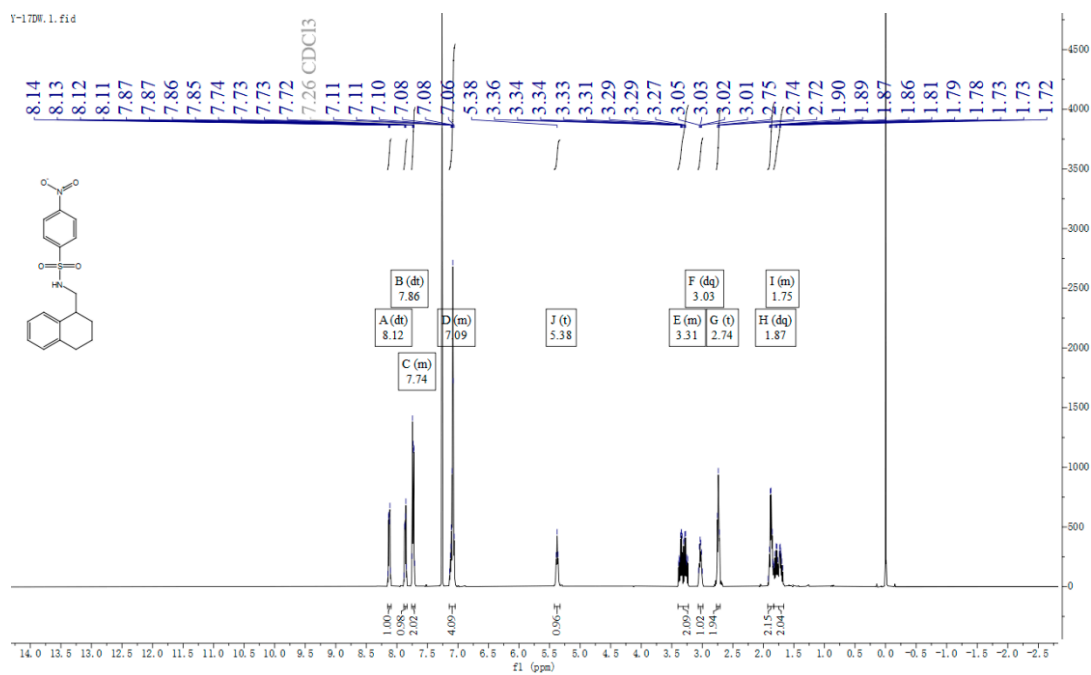

**Figure S19.** The <sup>1</sup>H spectrum (400MHz, CDCl<sub>3</sub>) of **rac-1w**.

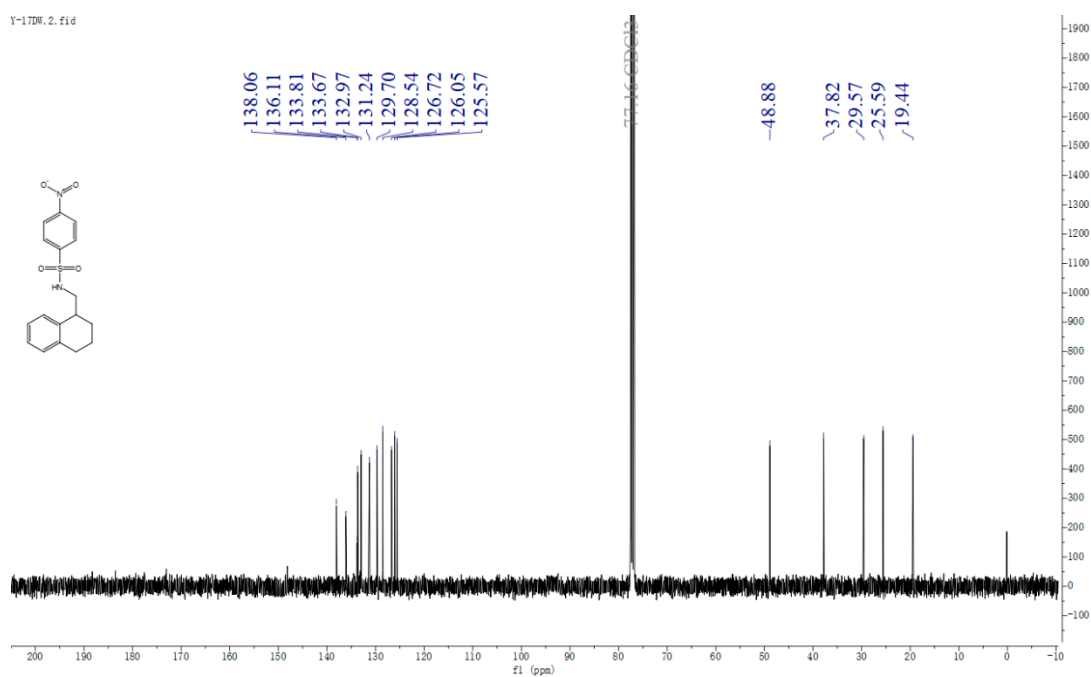

**Figure S20.** The <sup>13</sup>C spectrum (101MHz, CDCl<sub>3</sub>) of **rac-1w**.

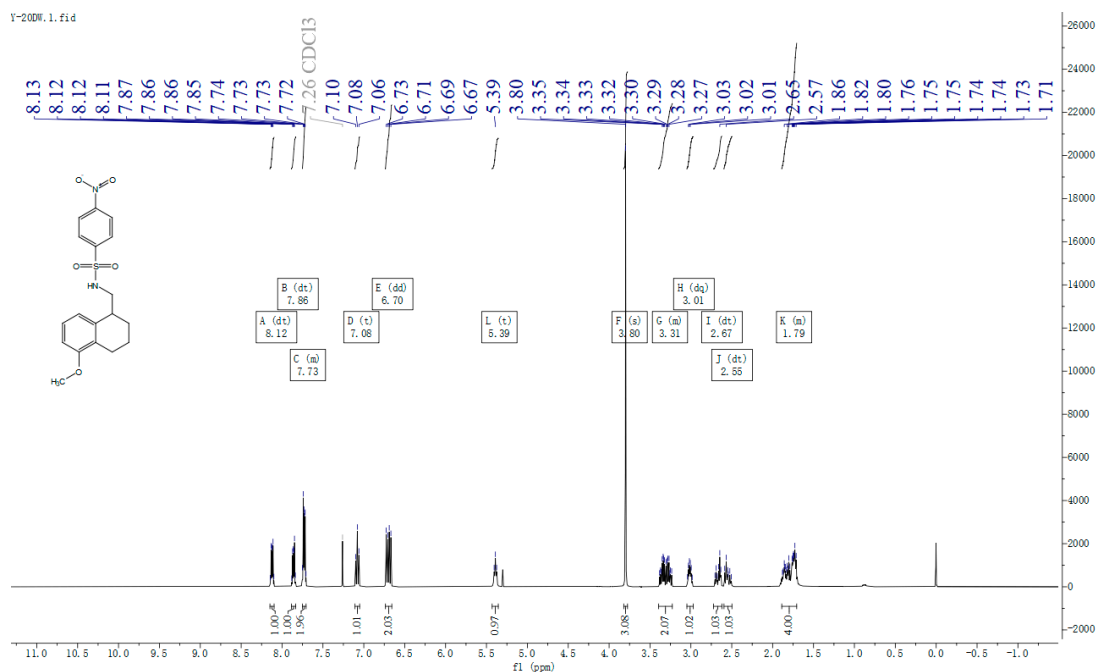

**Figure S21.** The <sup>1</sup>H spectrum (400MHz, CDCl<sub>3</sub>) of **rac-1x**.

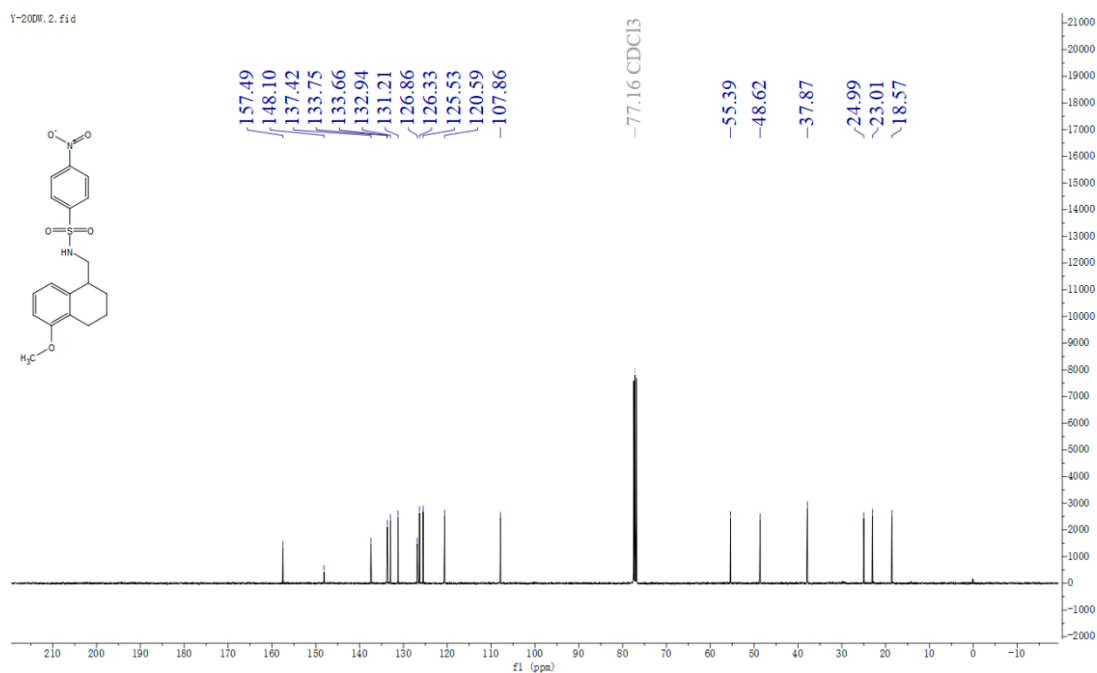

**Figure S22.** The <sup>13</sup>C spectrum (101MHz, CDCl<sub>3</sub>) of **rac-1x**.



2 The  $^1\text{H}$  spectrum and  $^{13}\text{C}$  spectrum of **2a-x** and **3**.

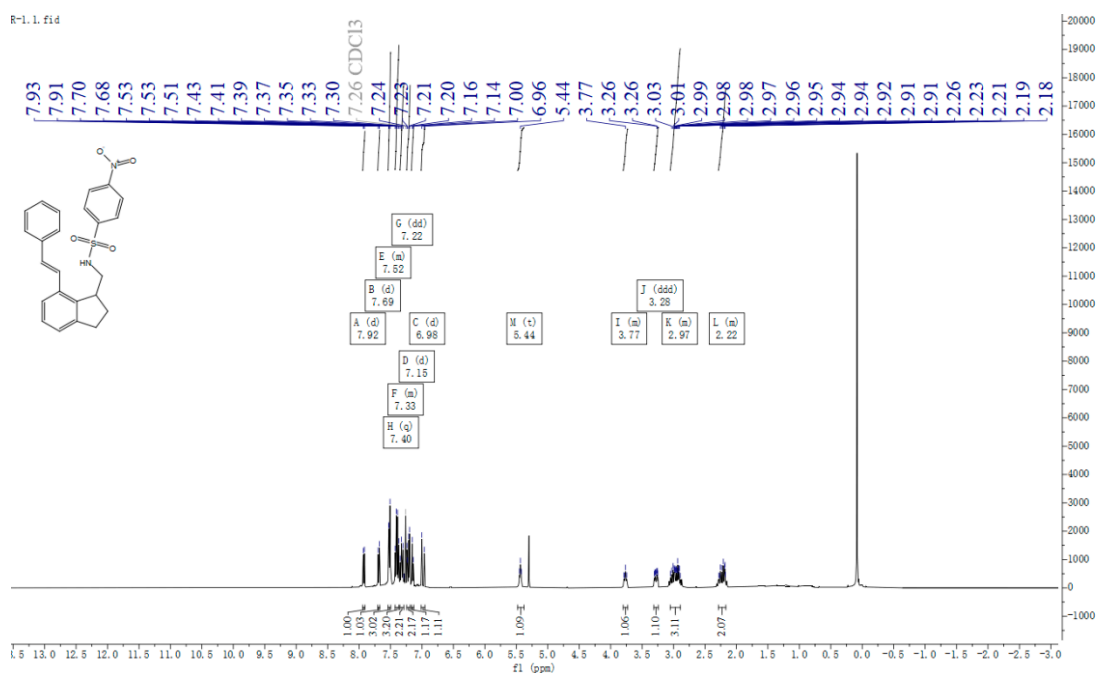

**Figure S23.** The  $^1\text{H}$  spectrum (400MHz,  $\text{CDCl}_3$ ) of **2a**.

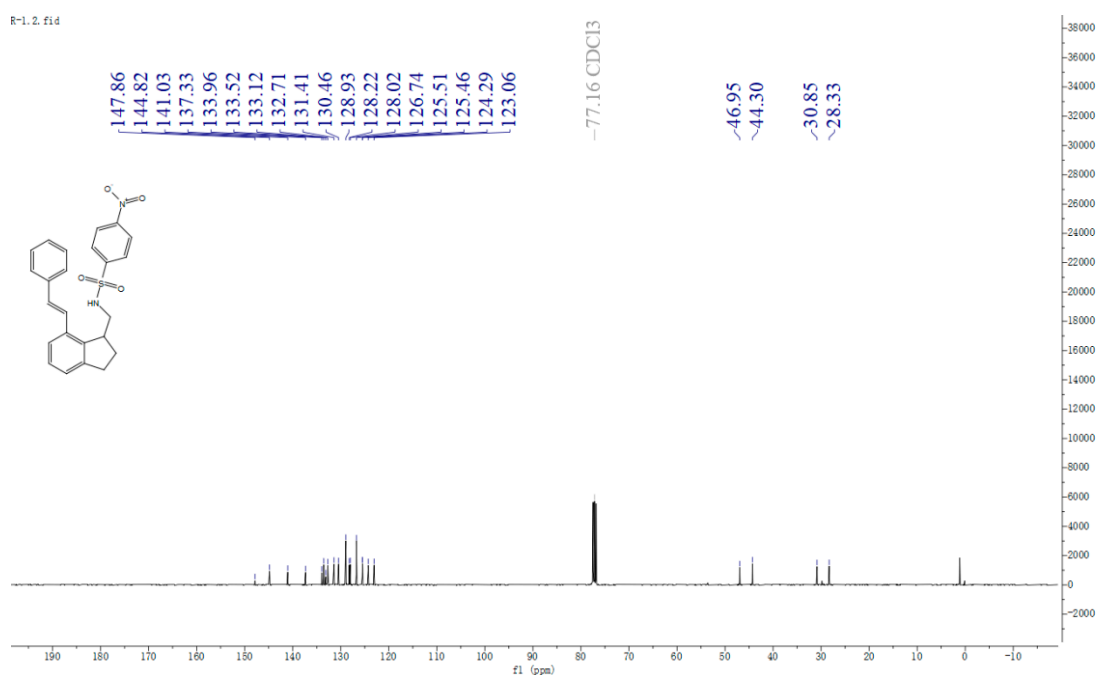

**Figure S24.** The  $^{13}\text{C}$  spectrum (101MHz,  $\text{CDCl}_3$ ) of **2a**.

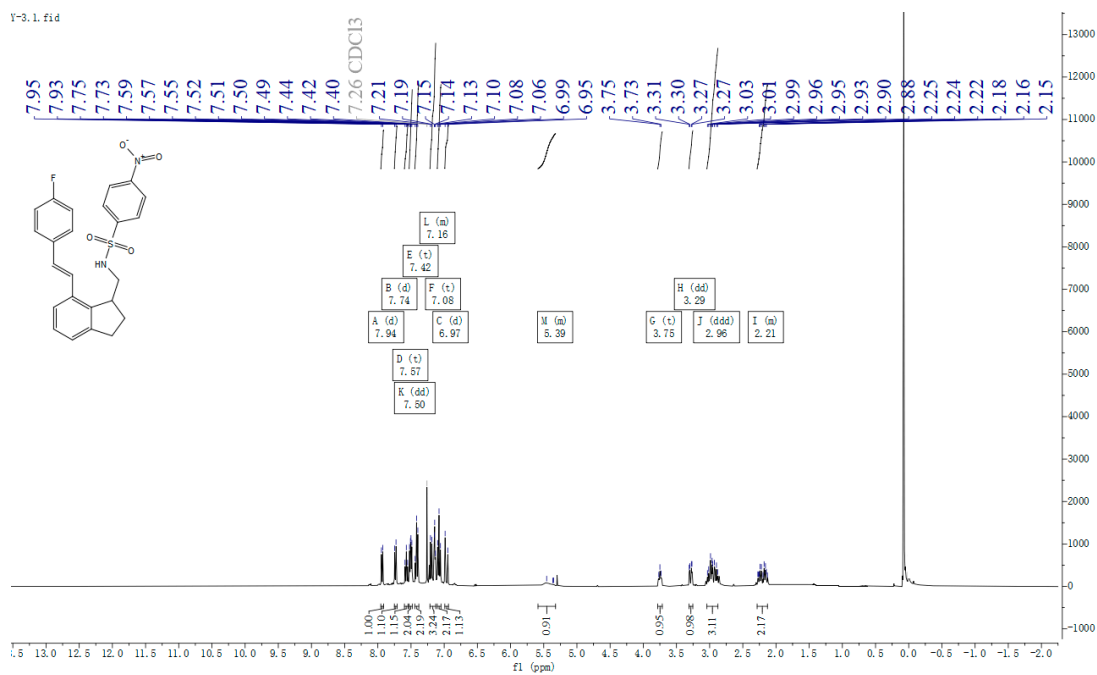

**Figure S25.** The <sup>1</sup>H spectrum (400MHz, CDCl<sub>3</sub>) of **2b**.

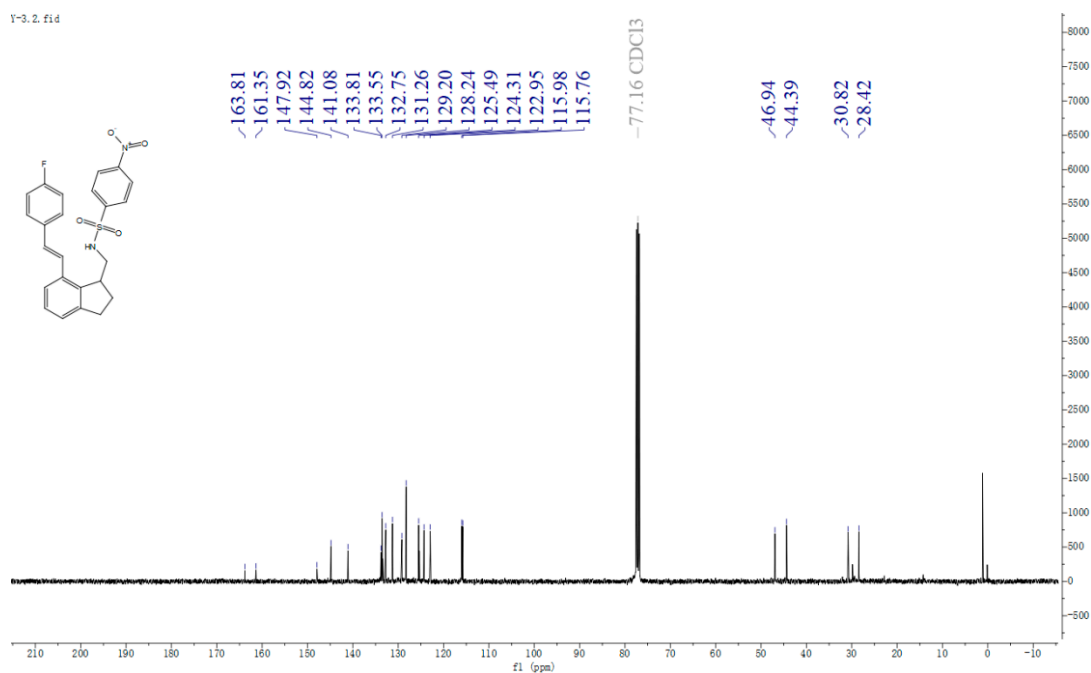

**Figure S26.** The <sup>13</sup>C spectrum (101MHz, CDCl<sub>3</sub>) of **2b**.

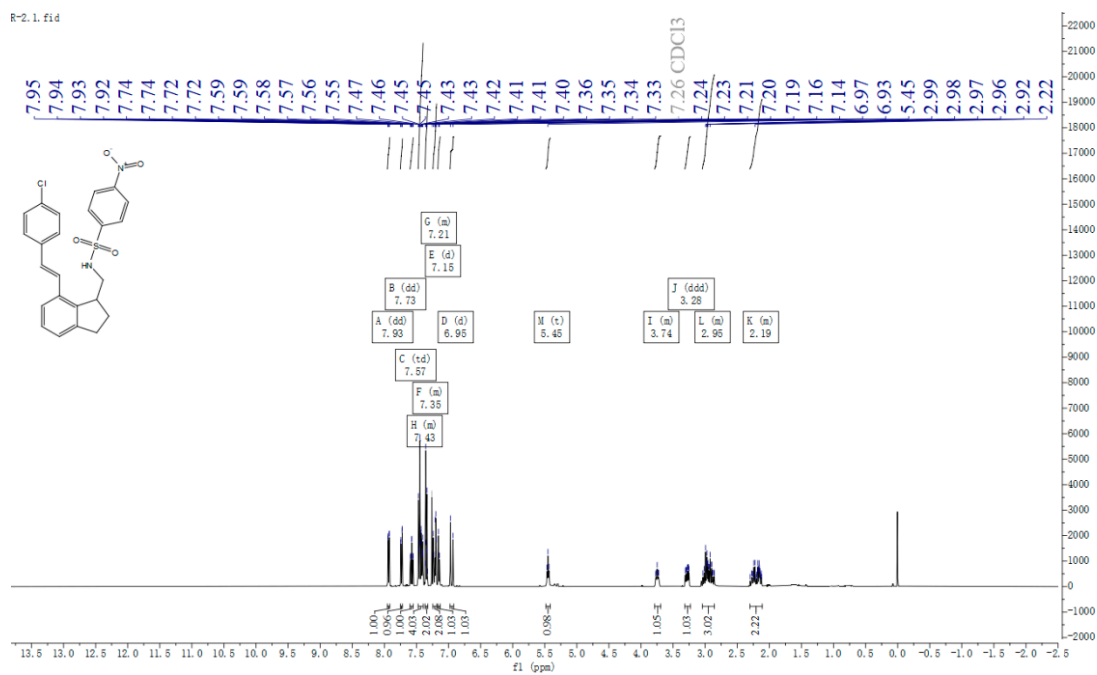

**Figure S27.** The  $^1\text{H}$  spectrum (400MHz,  $\text{CDCl}_3$ ) of **2c**.

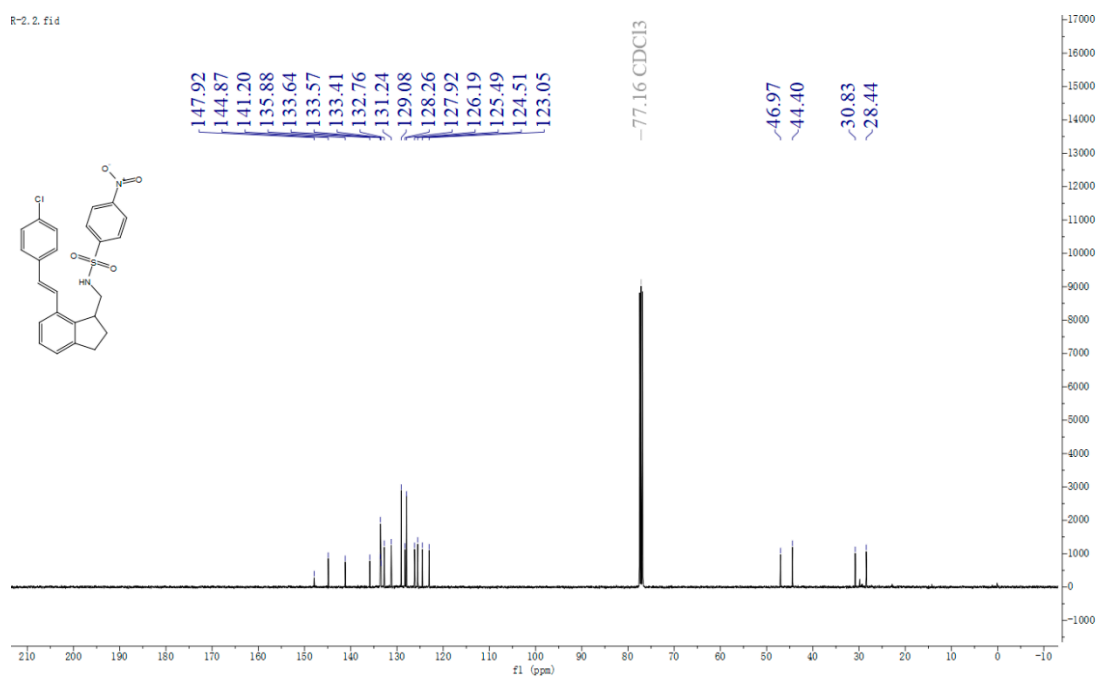

**Figure S28.** The  $^{13}\text{C}$  spectrum (101MHz,  $\text{CDCl}_3$ ) of **2c**.

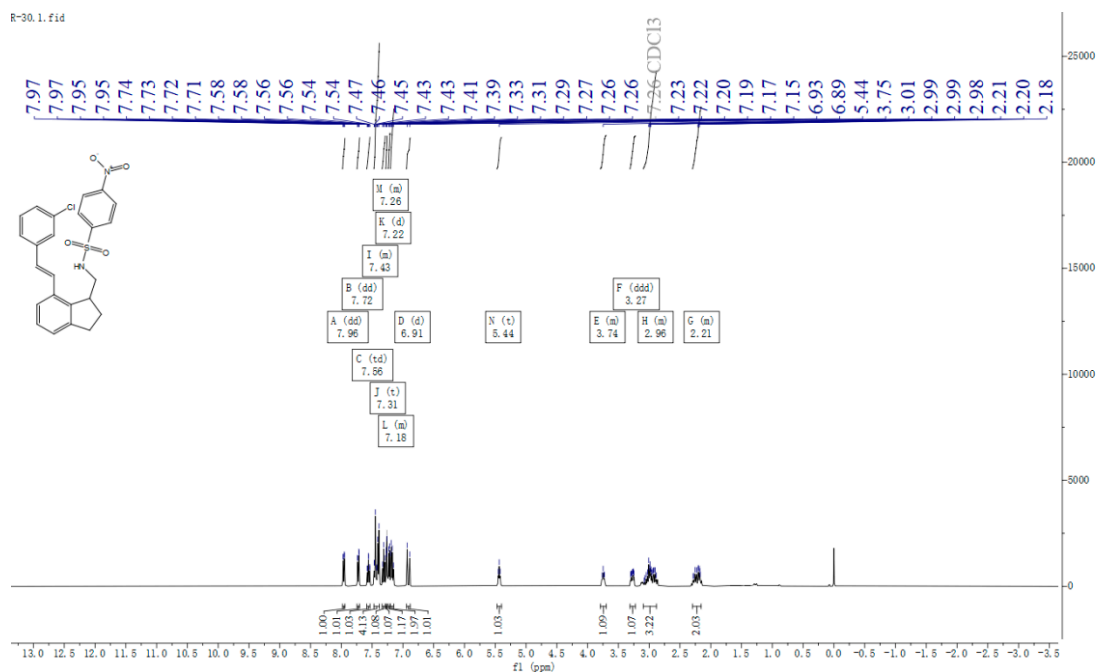

**Figure S29.** The  $^1\text{H}$  spectrum (400MHz,  $\text{CDCl}_3$ ) of **2d**.

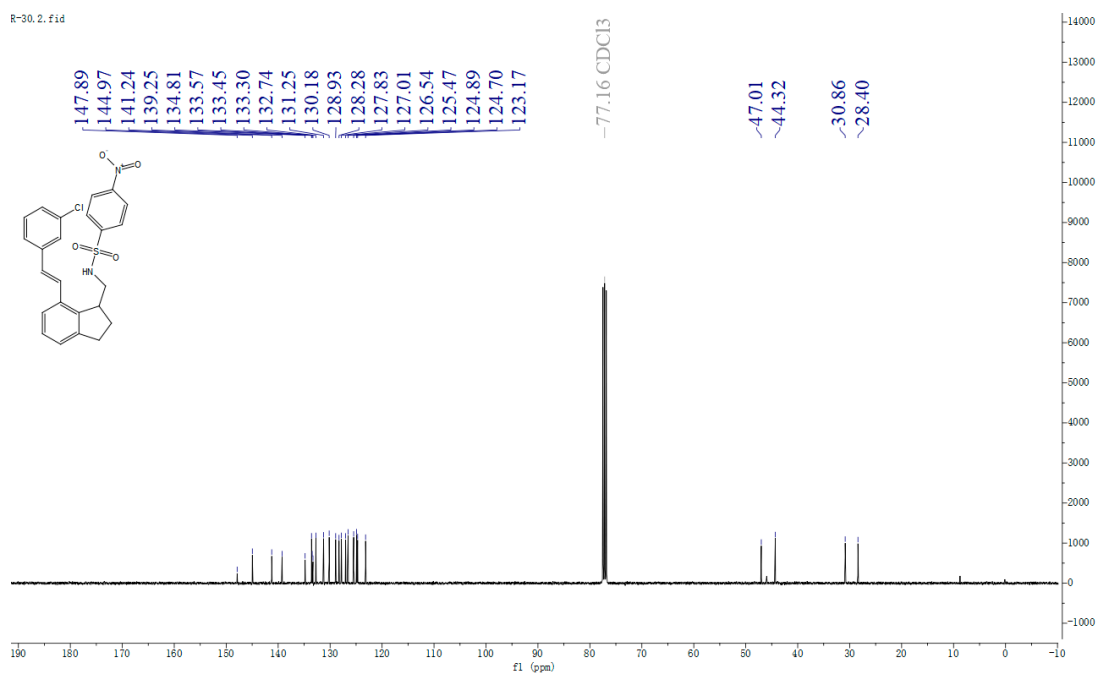

**Figure S30.** The  $^{13}\text{C}$  spectrum (101MHz,  $\text{CDCl}_3$ ) of **2d**.

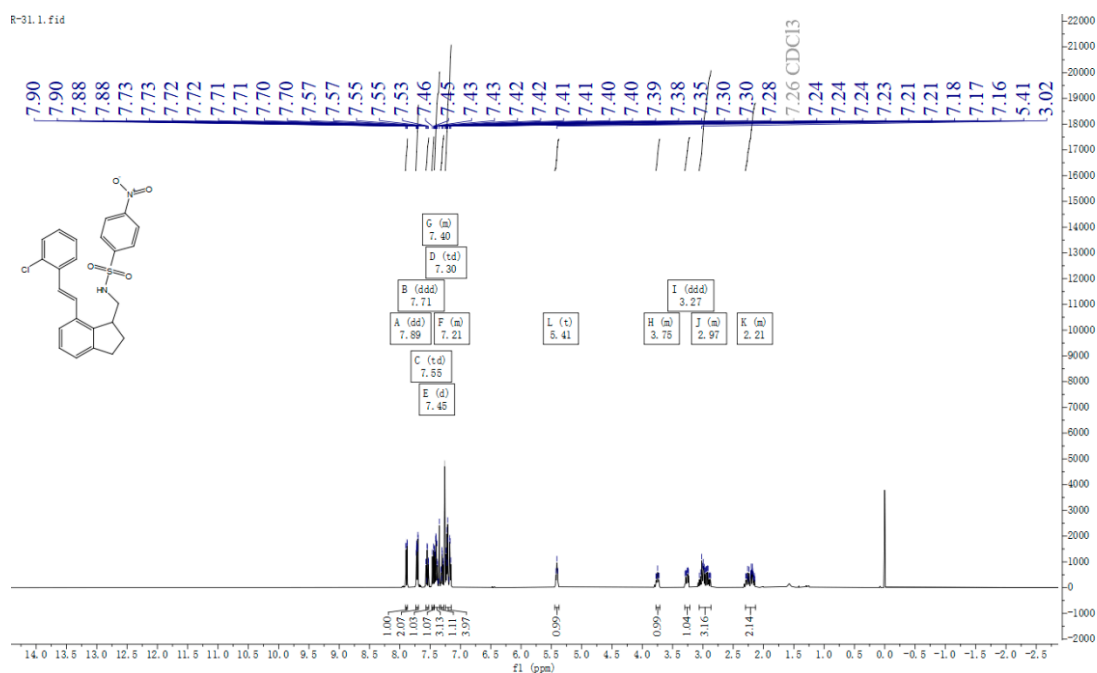

**Figure S31.** The <sup>1</sup>H spectrum (400MHz, CDCl<sub>3</sub>) of **2e**.

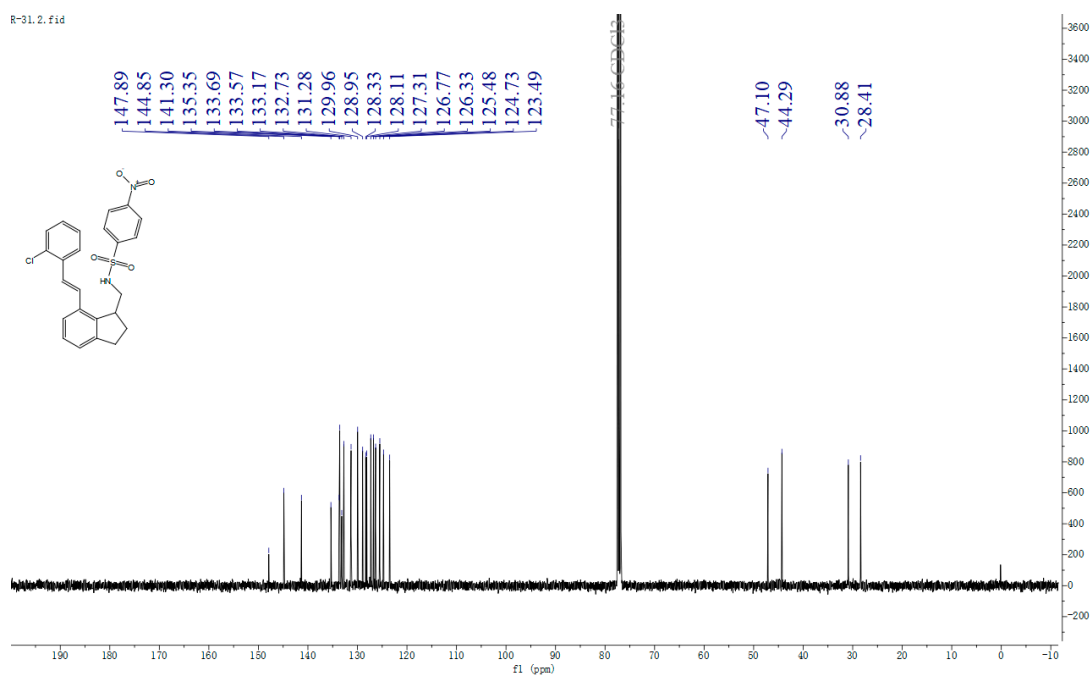

**Figure S32.** The <sup>13</sup>C spectrum (101MHz, CDCl<sub>3</sub>) of **2e**.

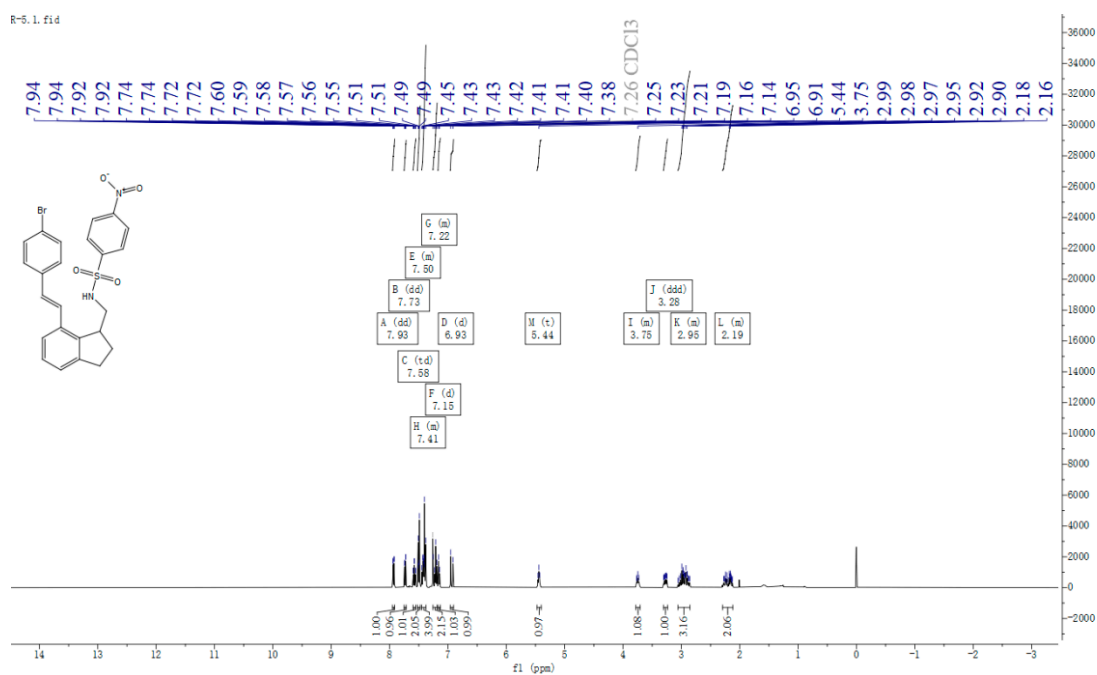

**Figure S33.** The <sup>1</sup>H spectrum (400MHz, CDCl<sub>3</sub>) of **2f**.

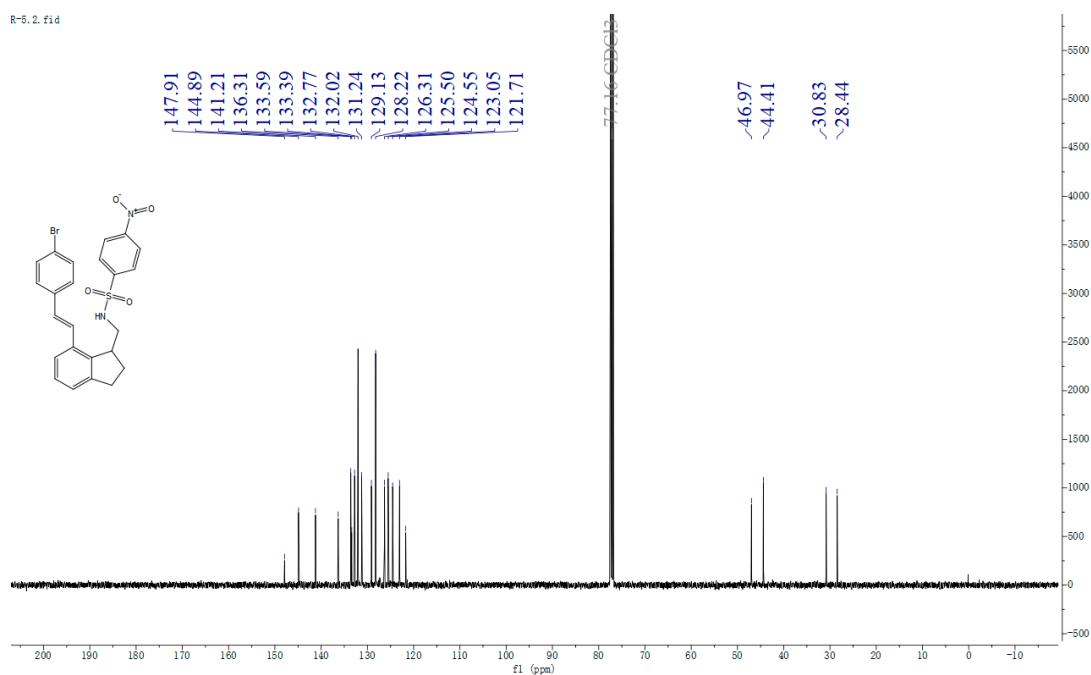

**Figure S34.** The <sup>13</sup>C spectrum (101MHz, CDCl<sub>3</sub>) of **2f**.

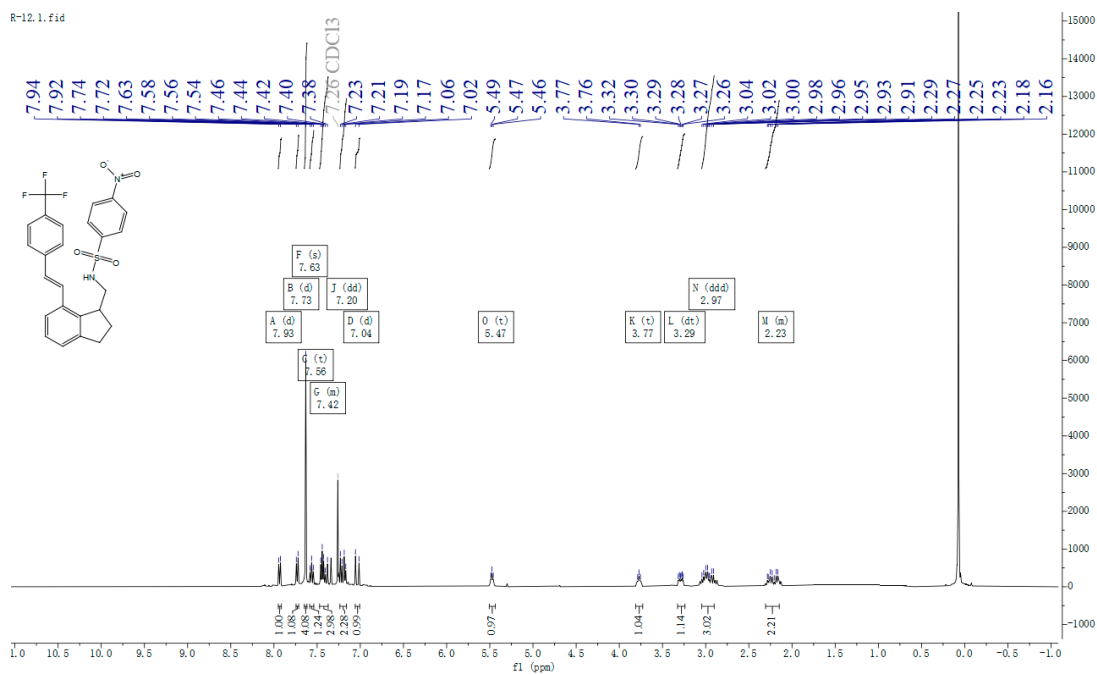

**Figure S35.** The <sup>1</sup>H spectrum (400MHz, CDCl<sub>3</sub>) of **2g**.

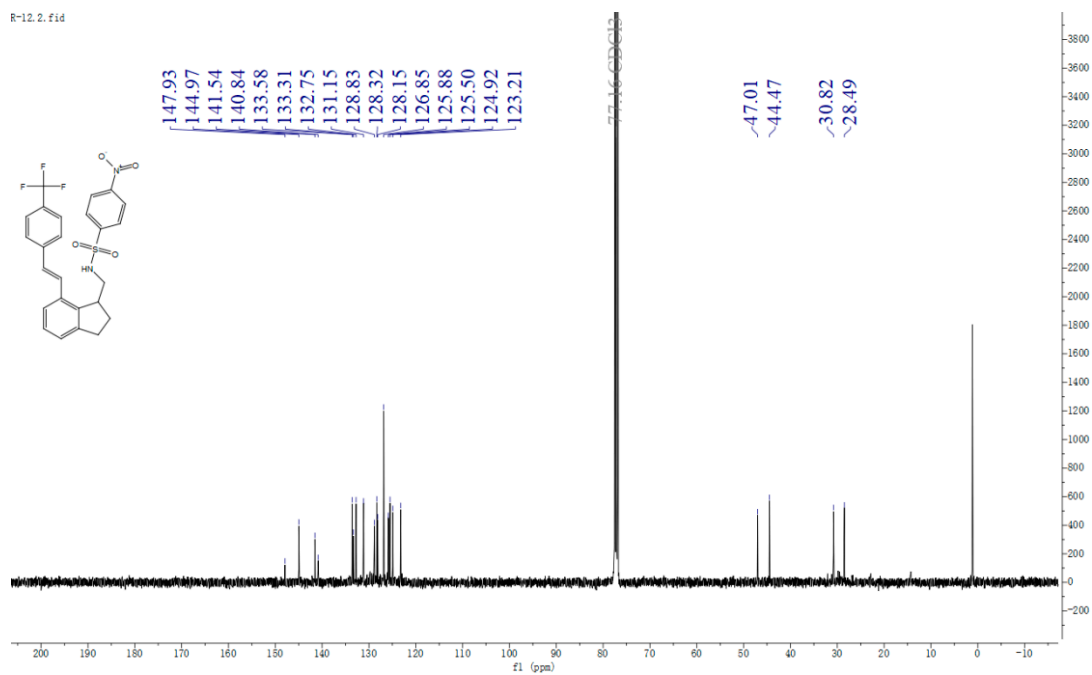

**Figure S36.** The <sup>13</sup>C spectrum (101MHz, CDCl<sub>3</sub>) of **2g**.

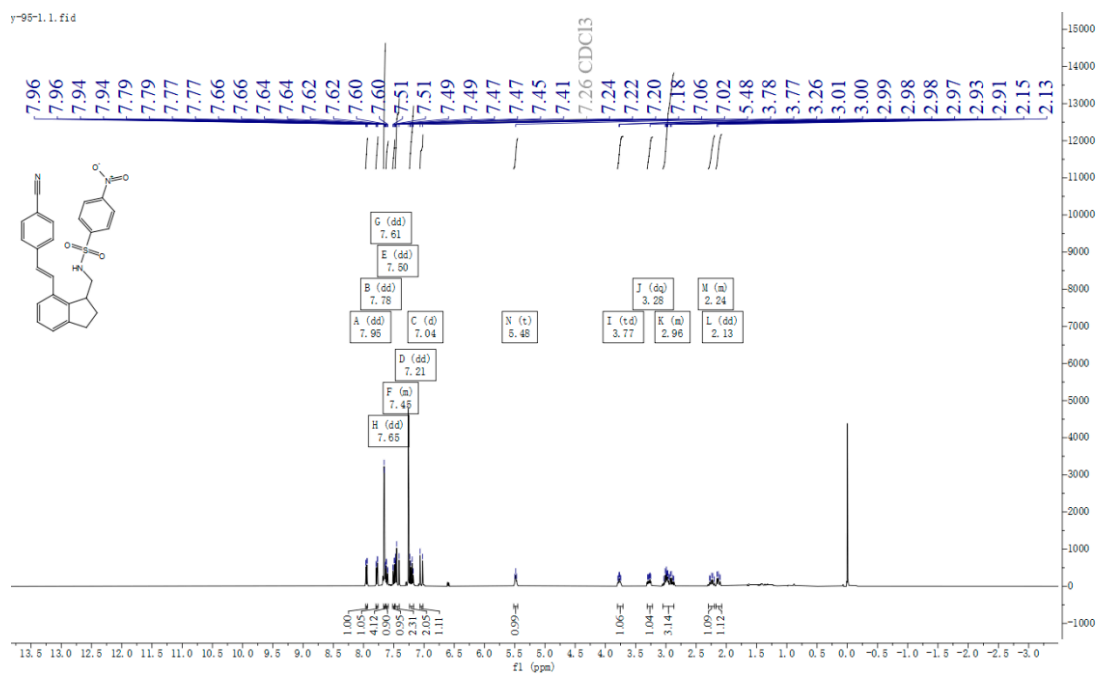

**Figure S37.** The <sup>1</sup>H spectrum (400MHz, CDCl<sub>3</sub>) of 2h.

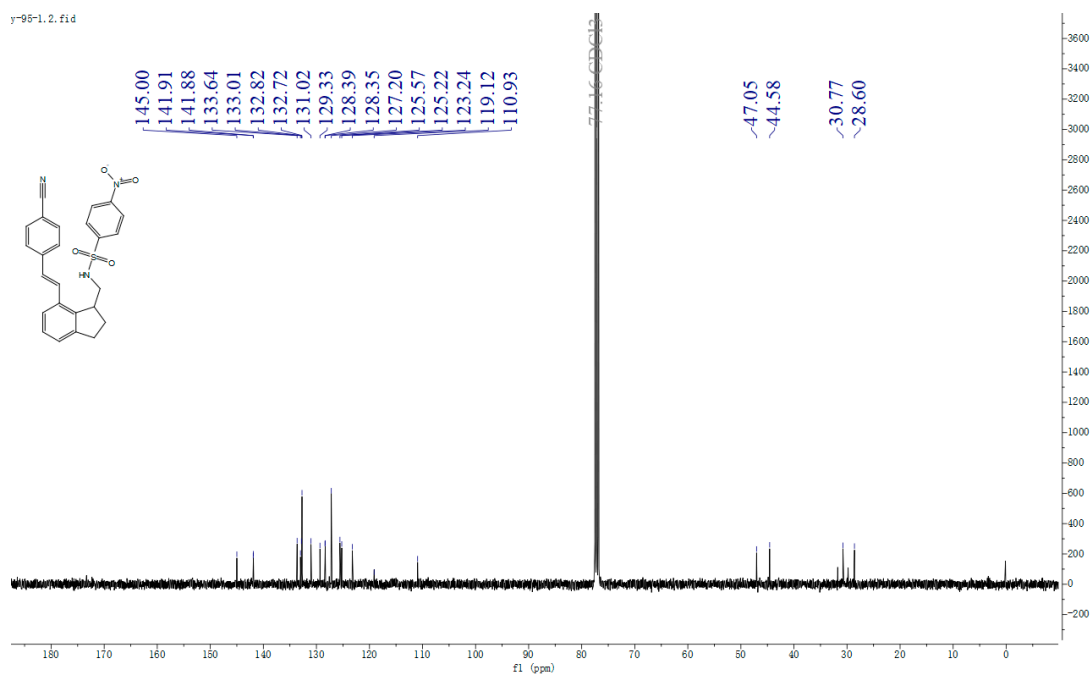

**Figure S38.** The <sup>13</sup>C spectrum (101MHz, CDCl<sub>3</sub>) of 2h.



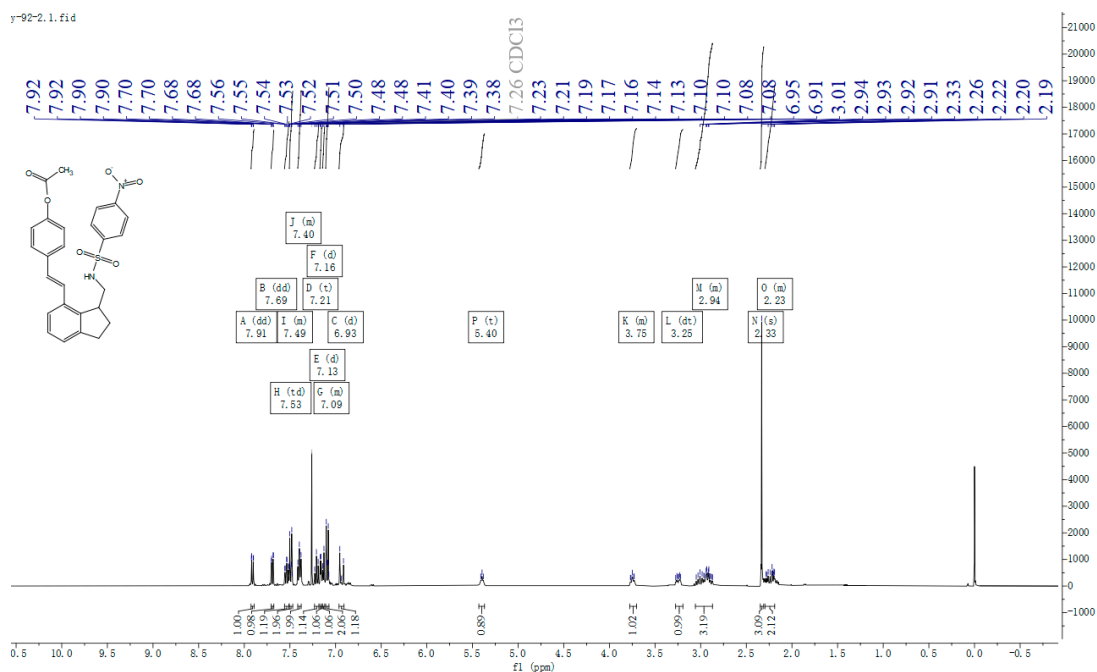

**Figure S39.** The <sup>1</sup>H spectrum (400MHz, CDCl<sub>3</sub>) of **2i**.

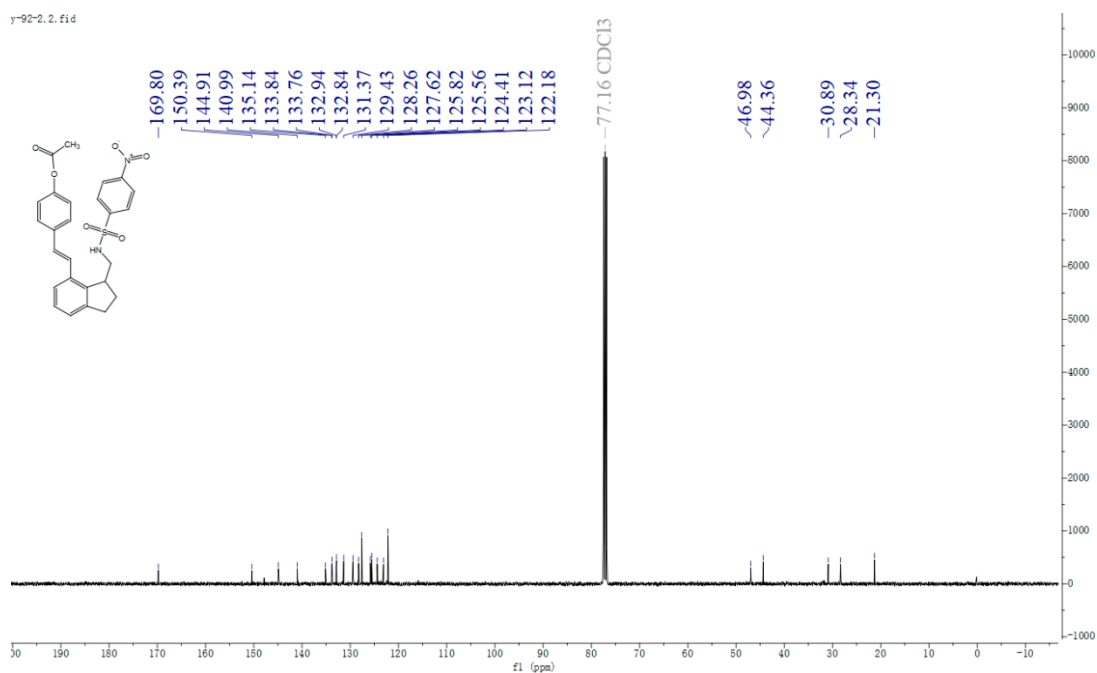

**Figure S40.** The <sup>13</sup>C spectrum (101MHz, CDCl<sub>3</sub>) of **2i**.



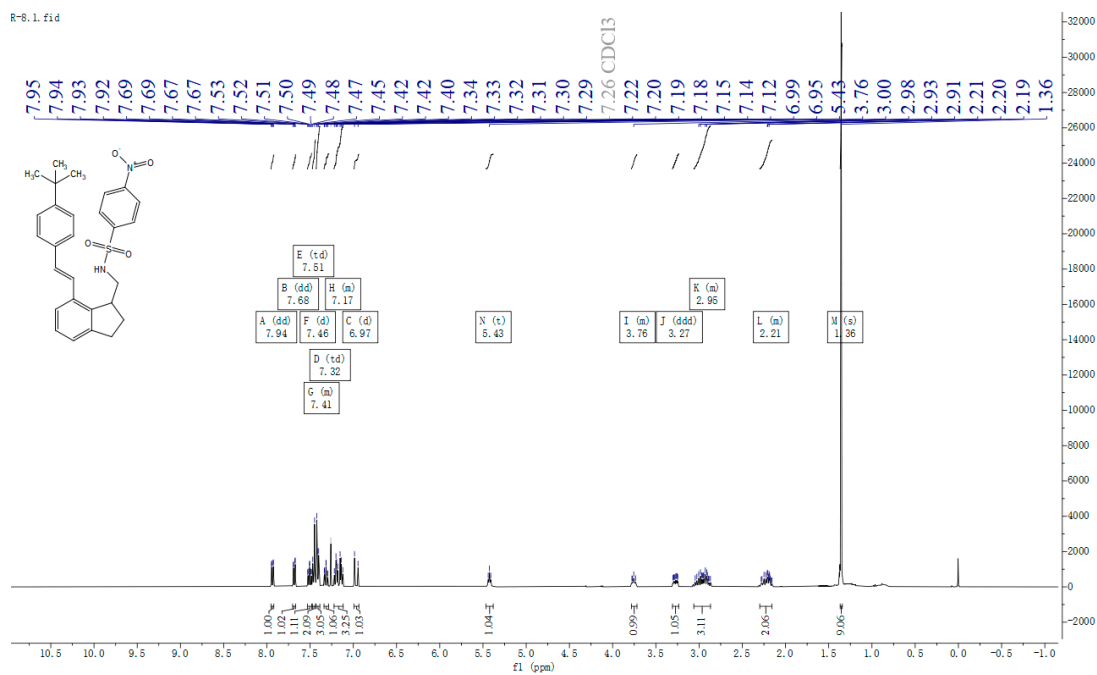

**Figure S43.** The  $^1\text{H}$  spectrum (400MHz,  $\text{CDCl}_3$ ) of **2k**.

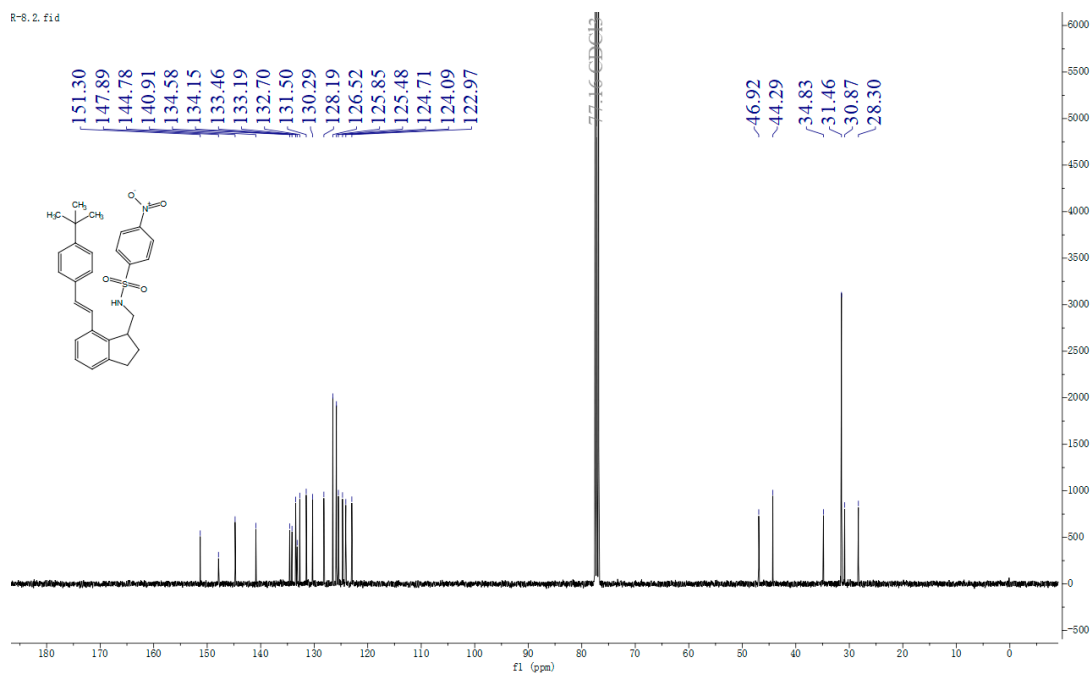

**Figure S44.** The  $^{13}\text{C}$  spectrum (101MHz,  $\text{CDCl}_3$ ) of **2k**.

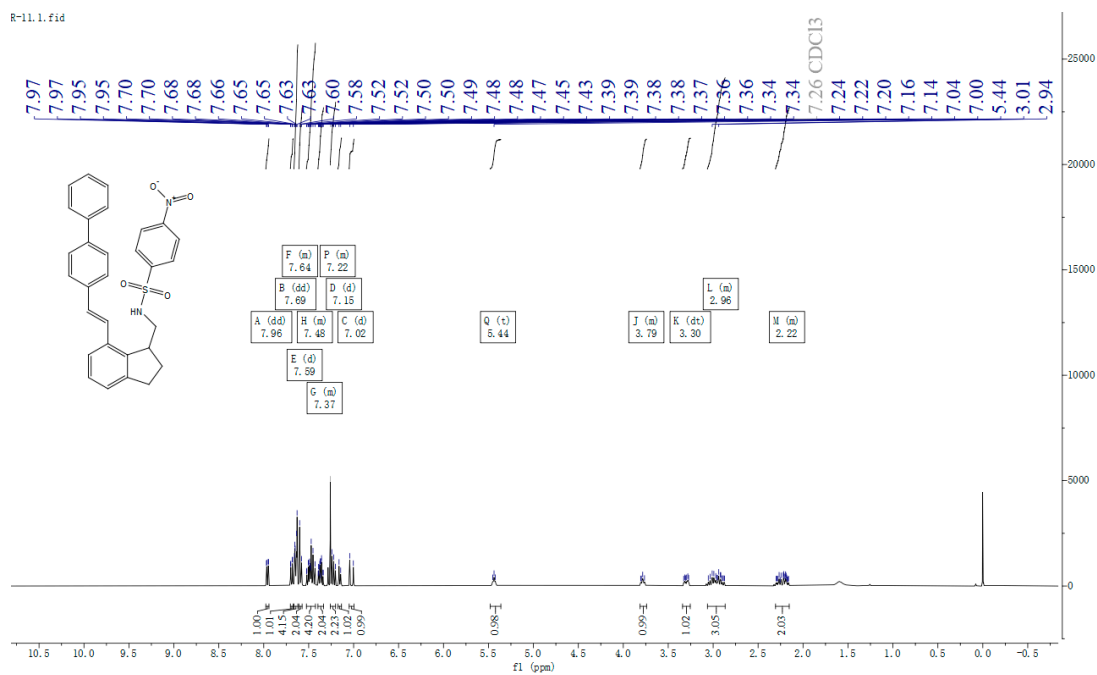

**Figure S45.** The <sup>1</sup>H spectrum (400MHz, CDCl<sub>3</sub>) of 21.

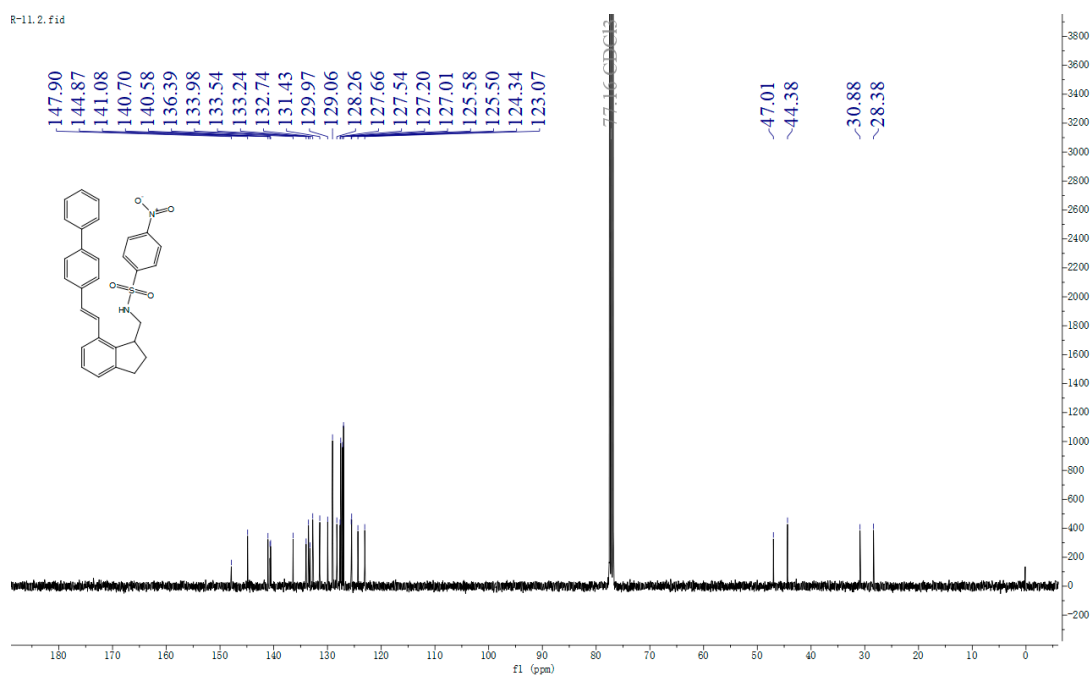

**Figure S46.** The <sup>13</sup>C spectrum (101MHz, CDCl<sub>3</sub>) of 21.

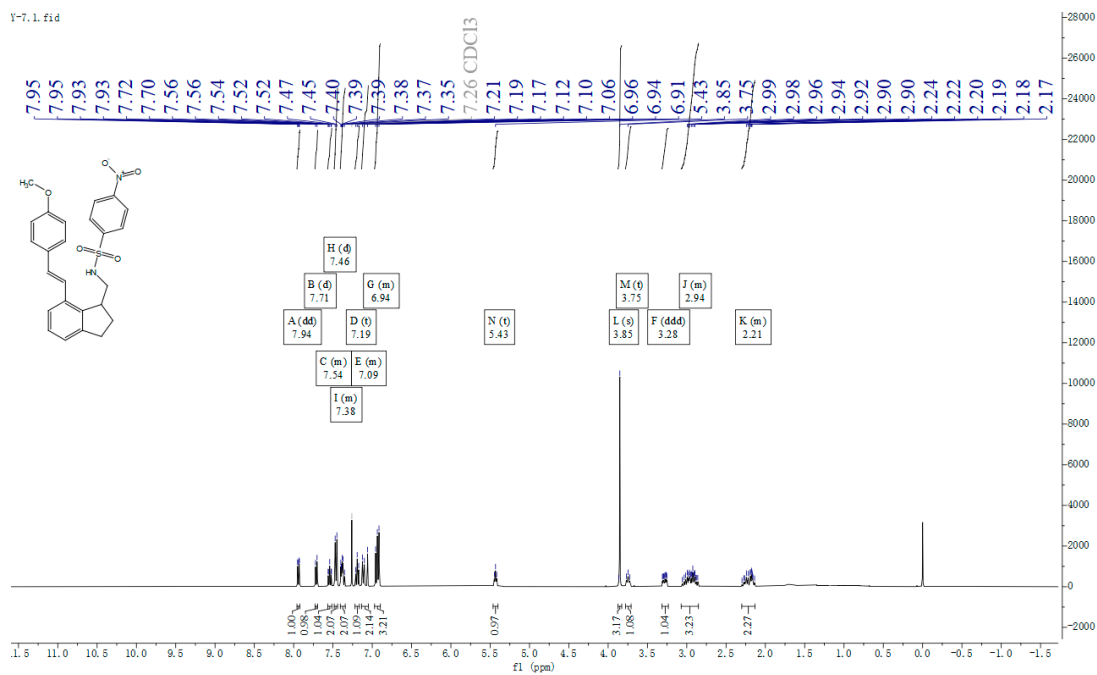

**Figure S47.** The <sup>1</sup>H spectrum (400MHz, CDCl<sub>3</sub>) of **2m**.

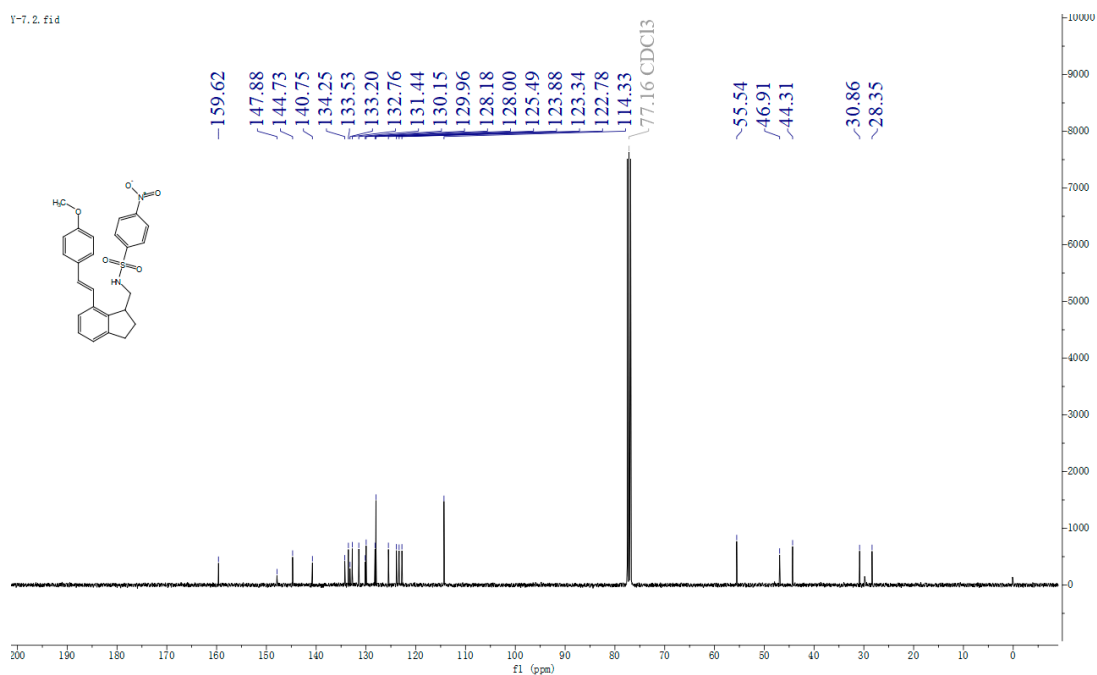

**Figure S48.** The <sup>13</sup>C spectrum (101MHz, CDCl<sub>3</sub>) of **2m**.

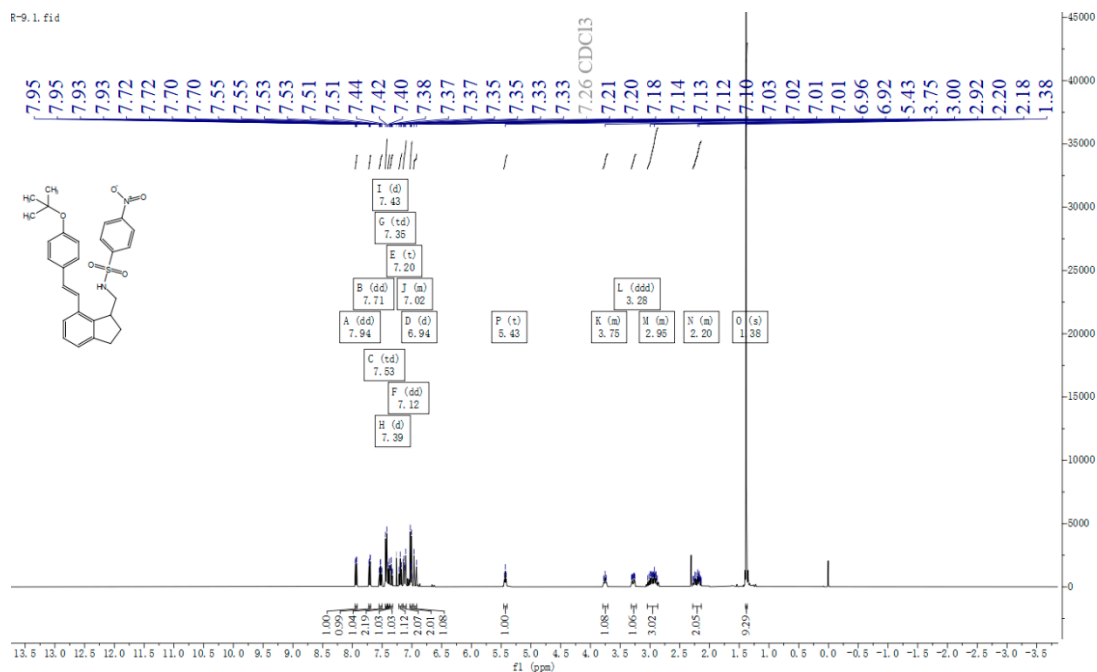

**Figure S49.** The  $^1\text{H}$  spectrum (400MHz,  $\text{CDCl}_3$ ) of 2n.

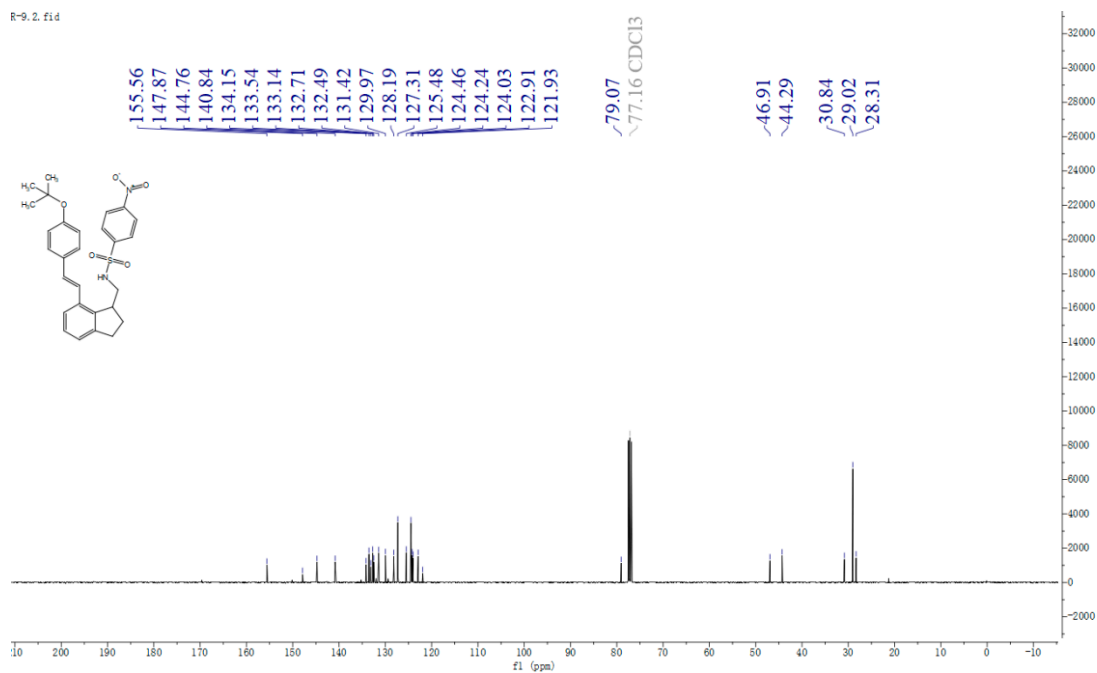

**Figure S50.** The  $^{13}\text{C}$  spectrum (101MHz,  $\text{CDCl}_3$ ) of 2n.

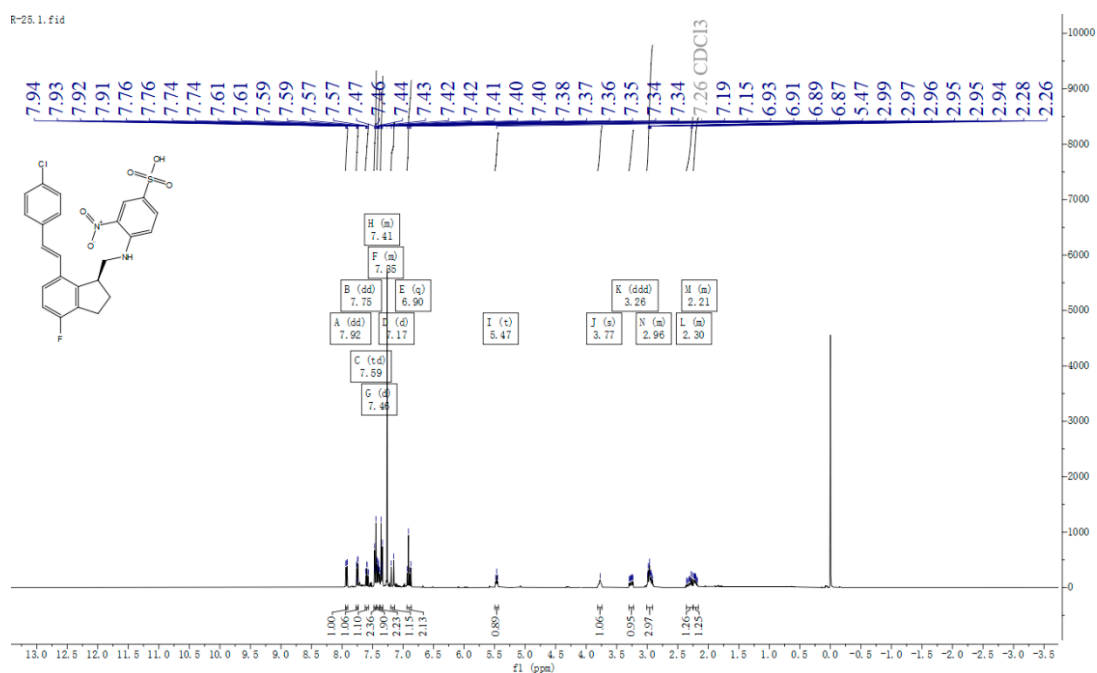

**Figure S51.** The  $^1\text{H}$  spectrum (400MHz,  $\text{CDCl}_3$ ) of **2o**.

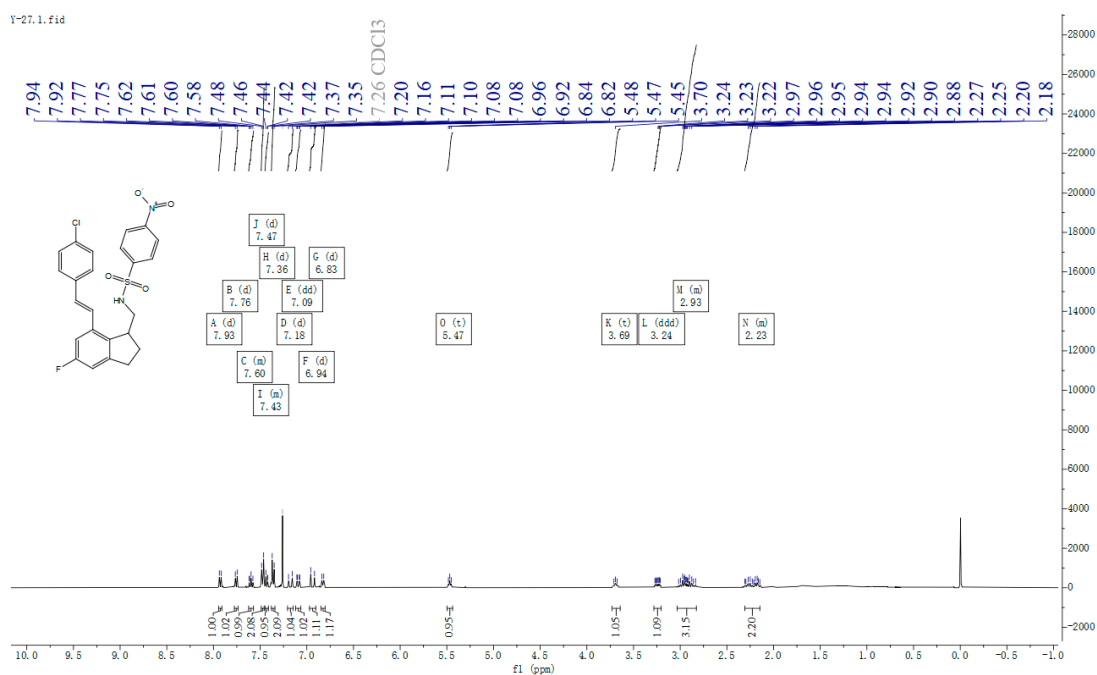

**Figure S52.** The  $^1\text{H}$  spectrum (400MHz,  $\text{CDCl}_3$ ) of **2p**.





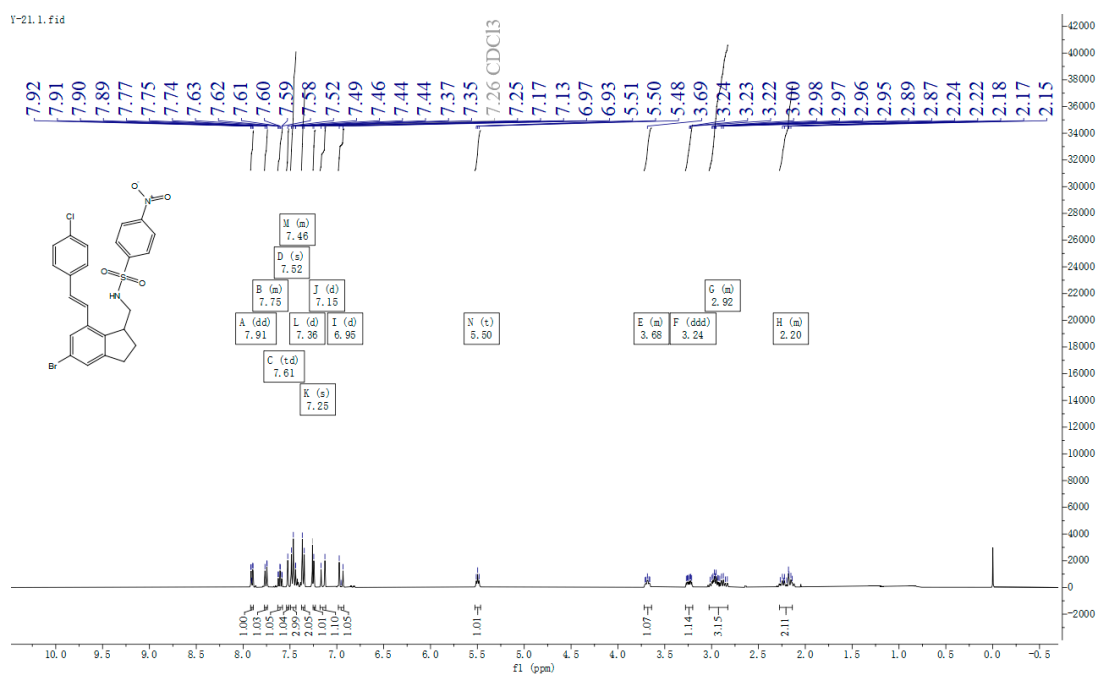

**Figure S55.** The  $^1\text{H}$  spectrum (400MHz,  $\text{CDCl}_3$ ) of **2r**.

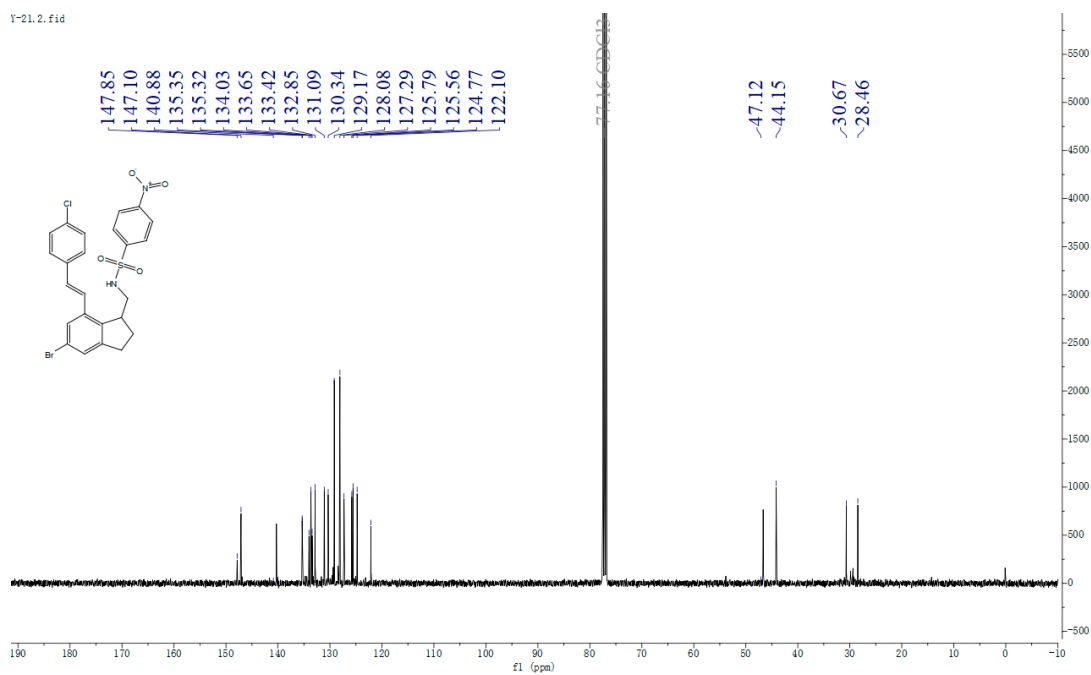

**Figure S56.** The  $^{13}\text{C}$  spectrum (101MHz,  $\text{CDCl}_3$ ) of **2r**.

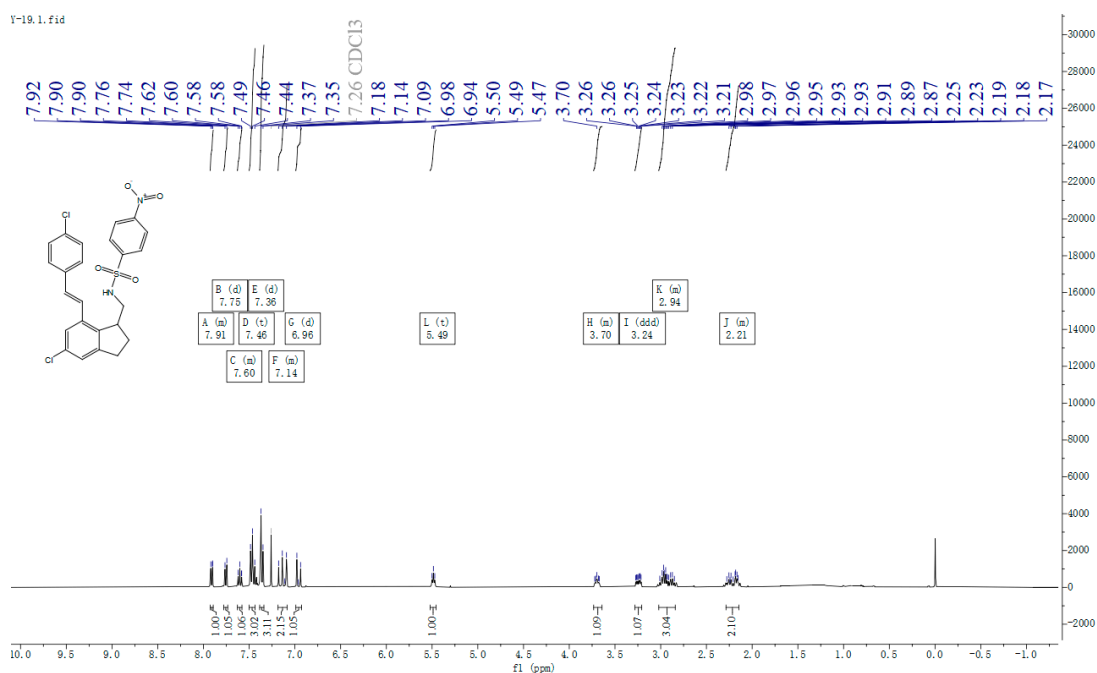

**Figure S57.** The  $^1\text{H}$  spectrum (400MHz,  $\text{CDCl}_3$ ) of **2s**.

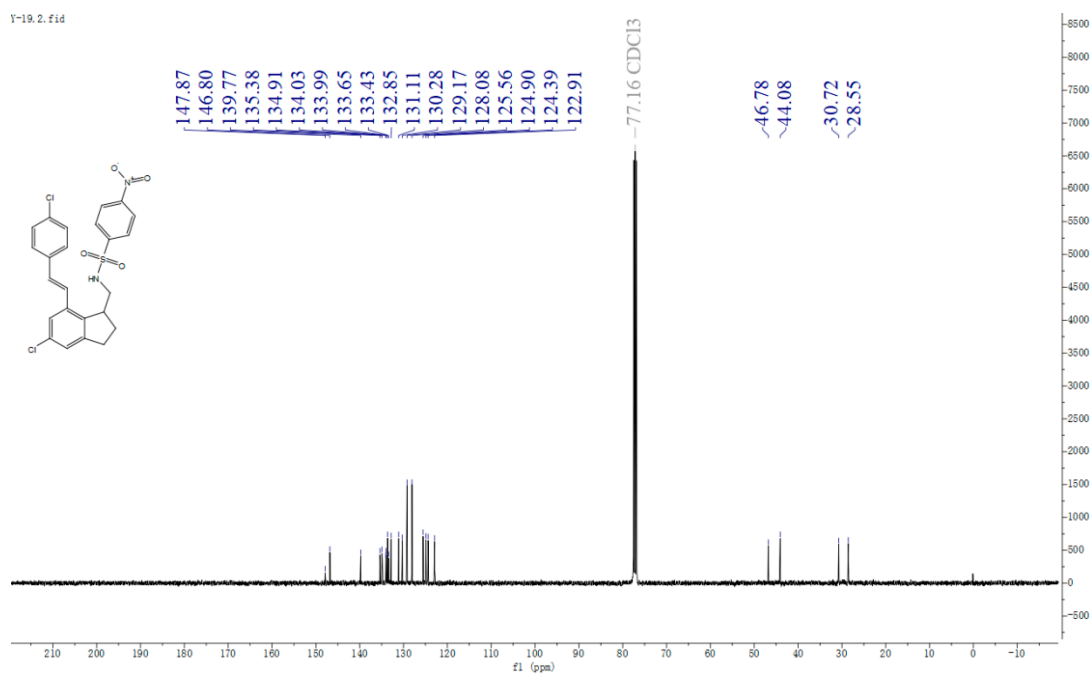

**Figure S58.** The  $^{13}\text{C}$  spectrum (101MHz,  $\text{CDCl}_3$ ) of **2s**.

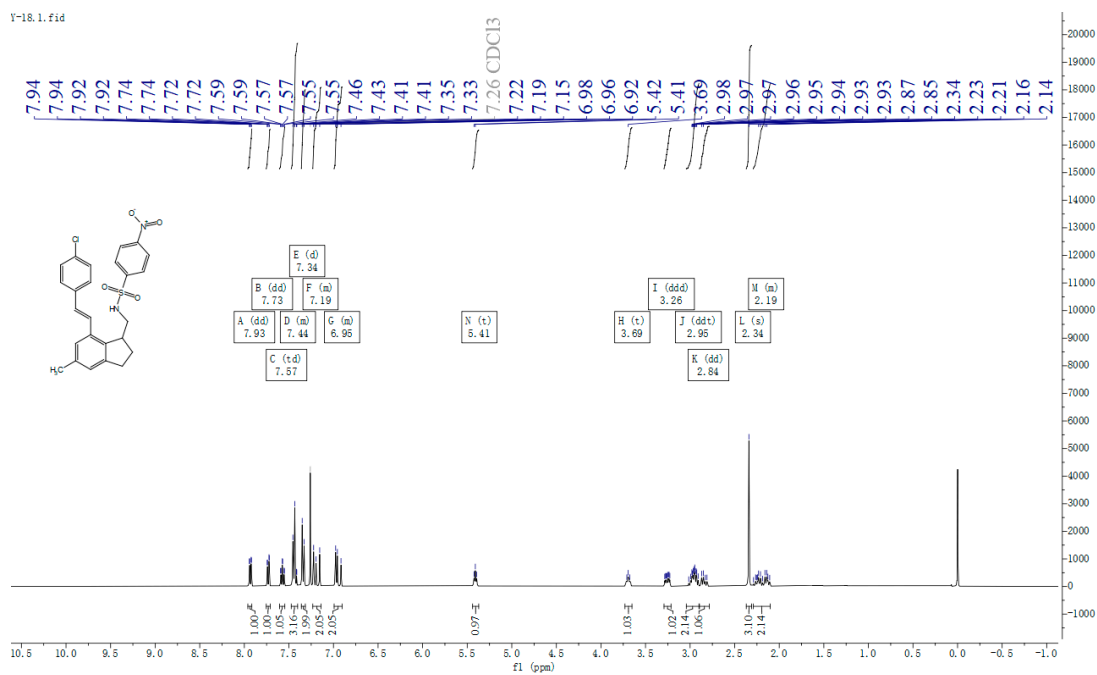

**Figure S59.** The <sup>1</sup>H spectrum (400MHz, CDCl<sub>3</sub>) of 2t.

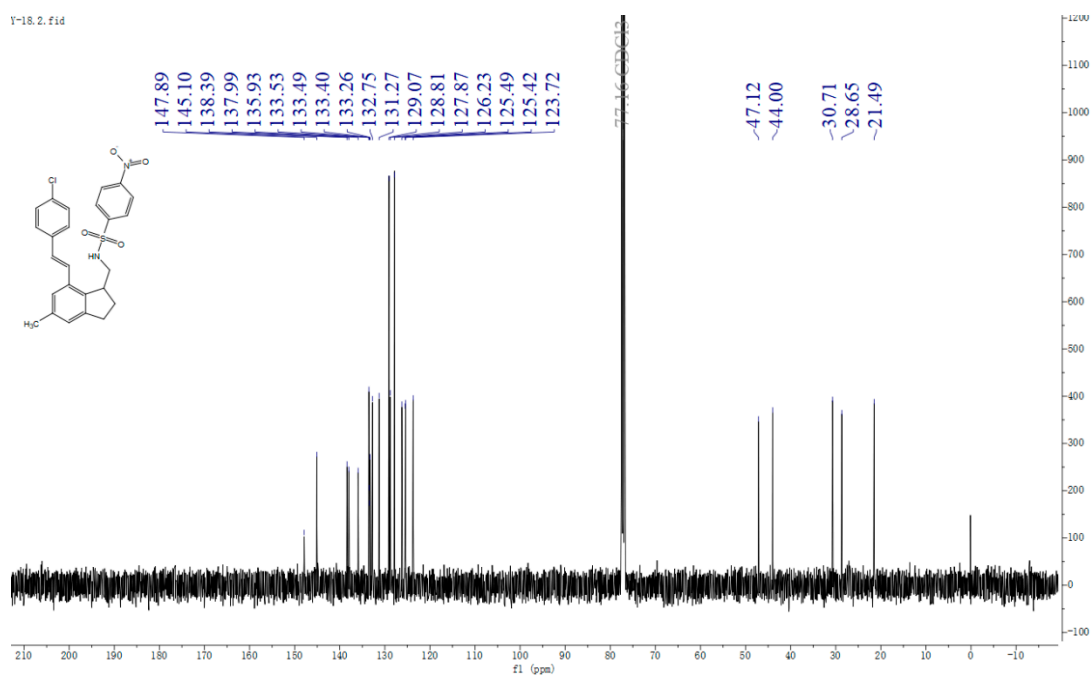

**Figure S60.** The <sup>13</sup>C spectrum (101MHz, CDCl<sub>3</sub>) of 2t.

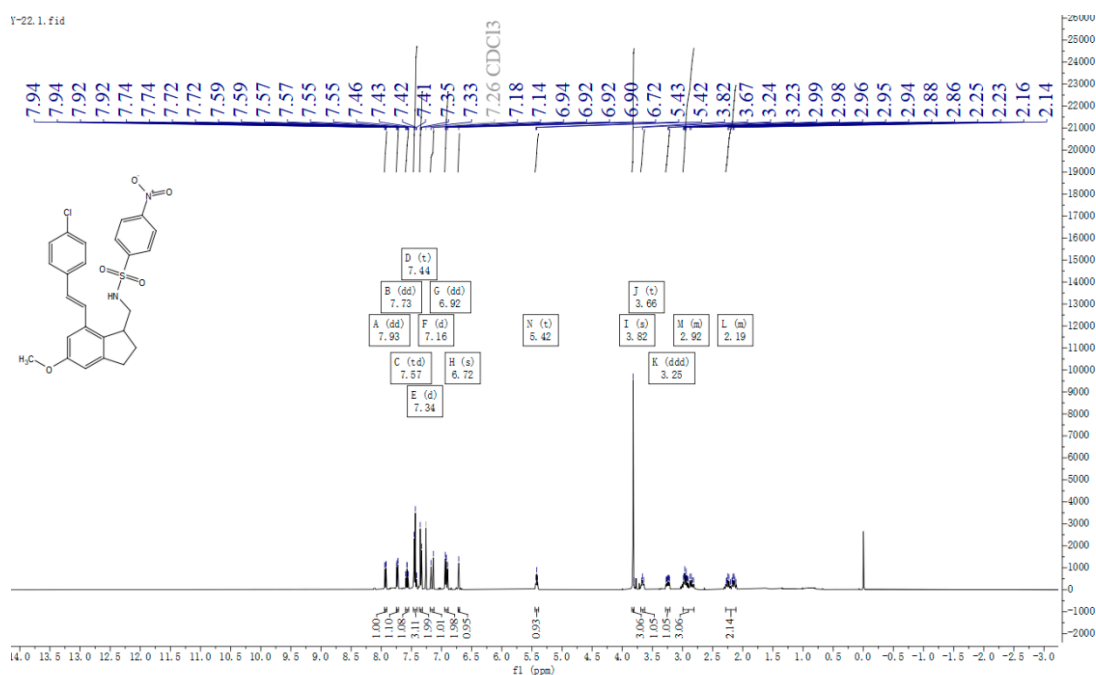

**Figure S61.** The  $^1\text{H}$  spectrum (400MHz,  $\text{CDCl}_3$ ) of **2u**.

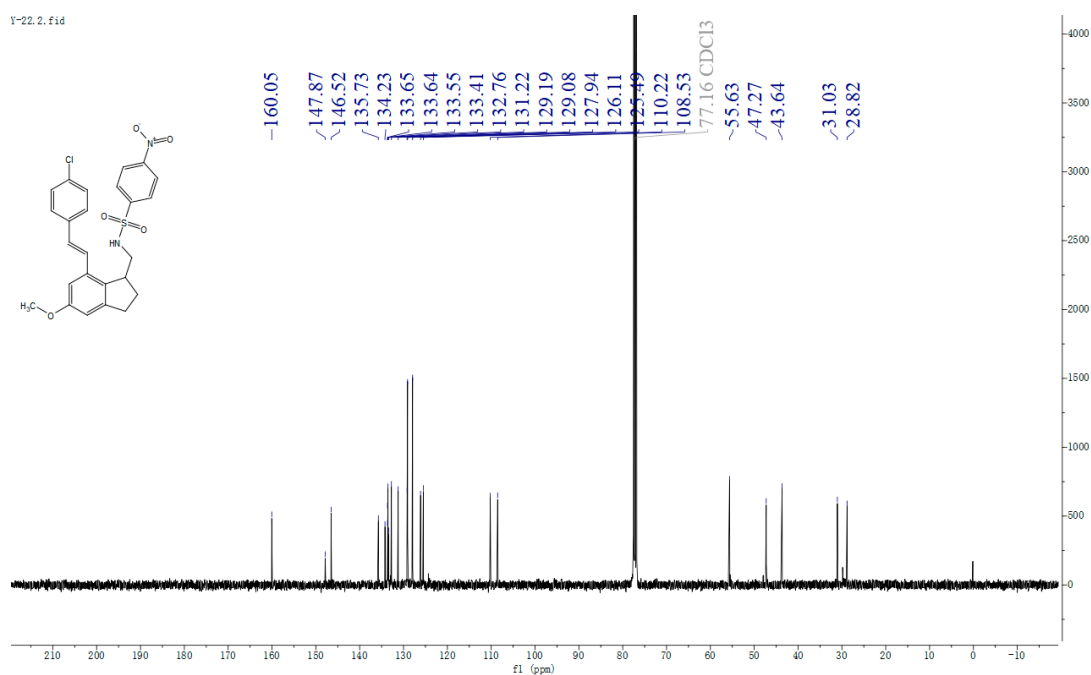

**Figure S62.** The  $^{13}\text{C}$  spectrum (101MHz,  $\text{CDCl}_3$ ) of **2u**.

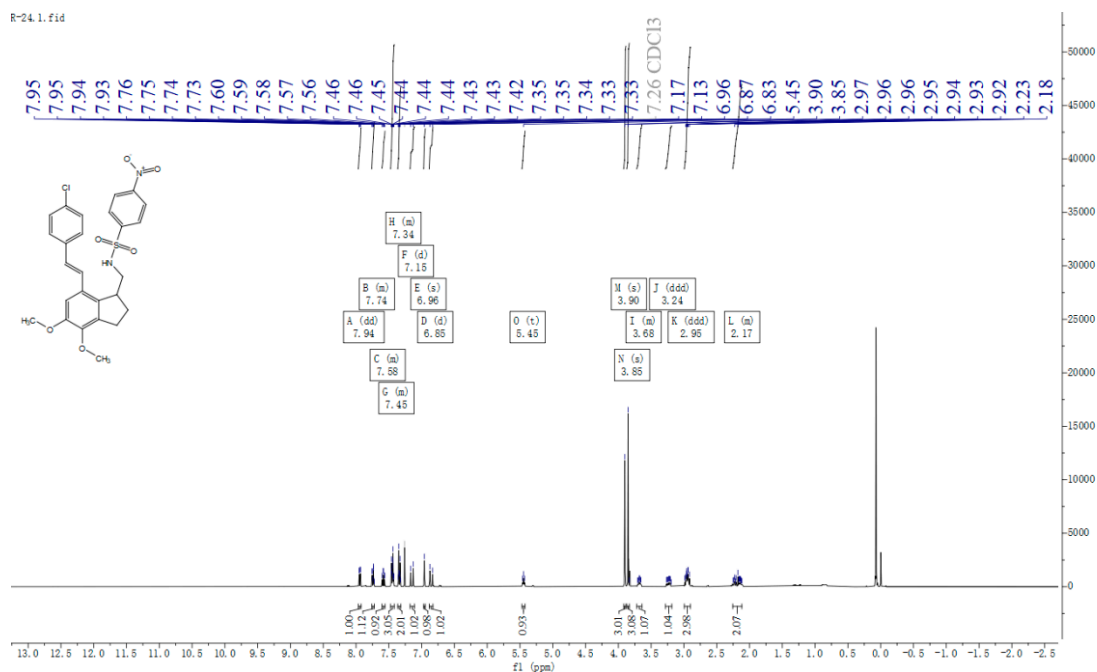

**Figure S63.** The <sup>1</sup>H spectrum (400MHz, CDCl<sub>3</sub>) of 2v.

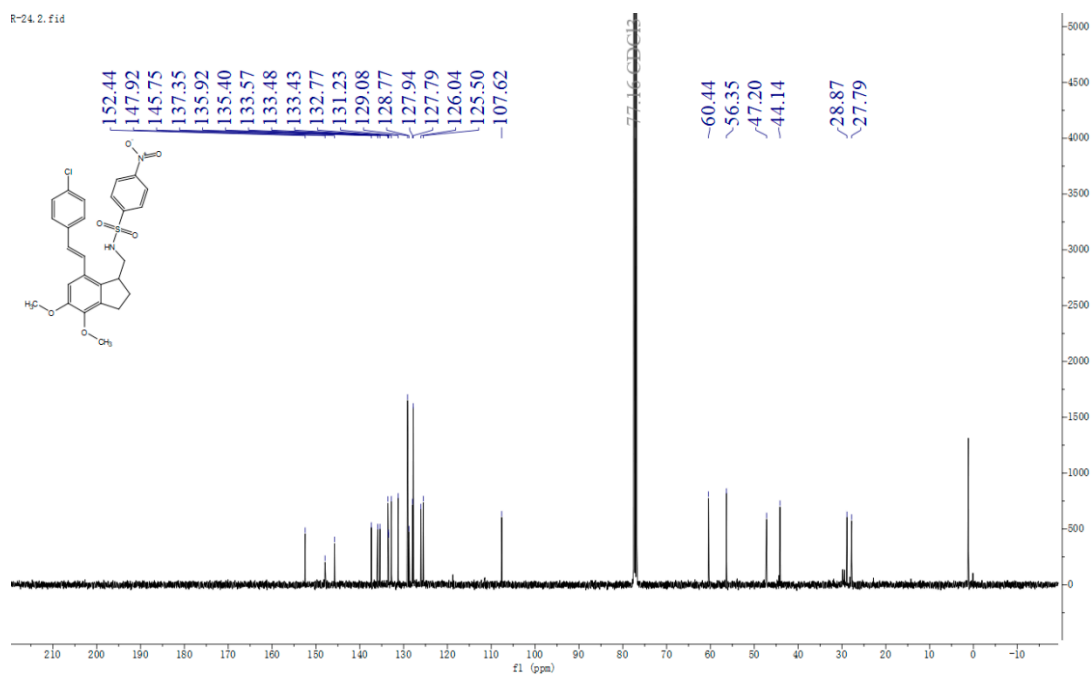

**Figure S64.** The <sup>13</sup>C spectrum (101MHz, CDCl<sub>3</sub>) of 2v.



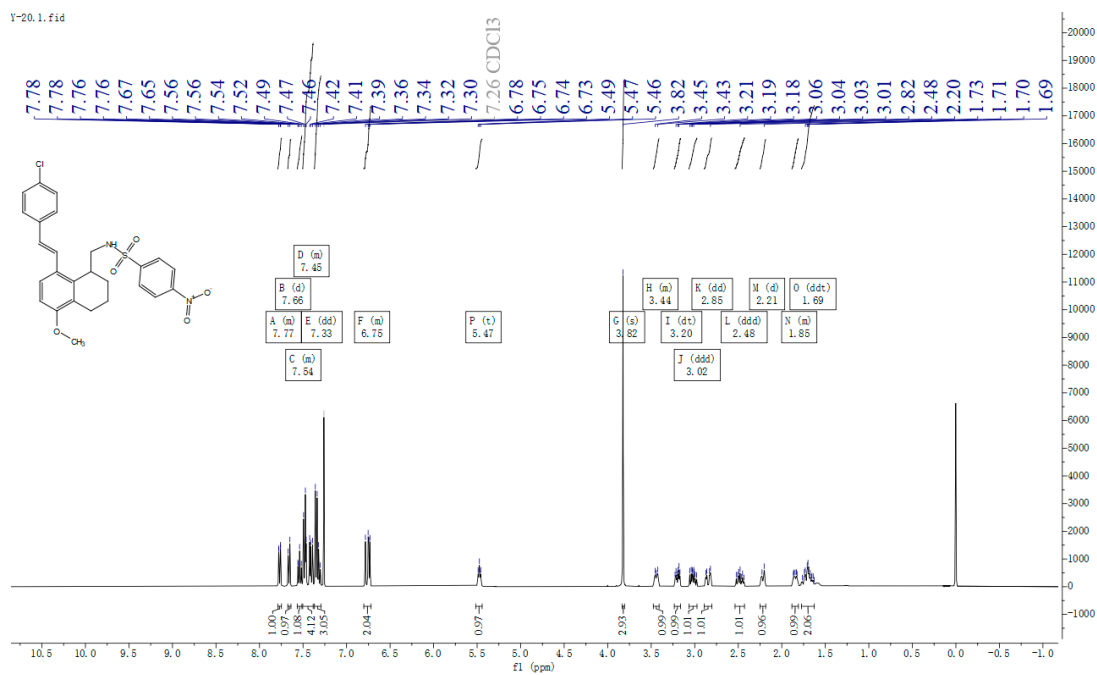

**Figure S67.** The <sup>1</sup>H spectrum (400MHz, CDCl<sub>3</sub>) of **2x**.

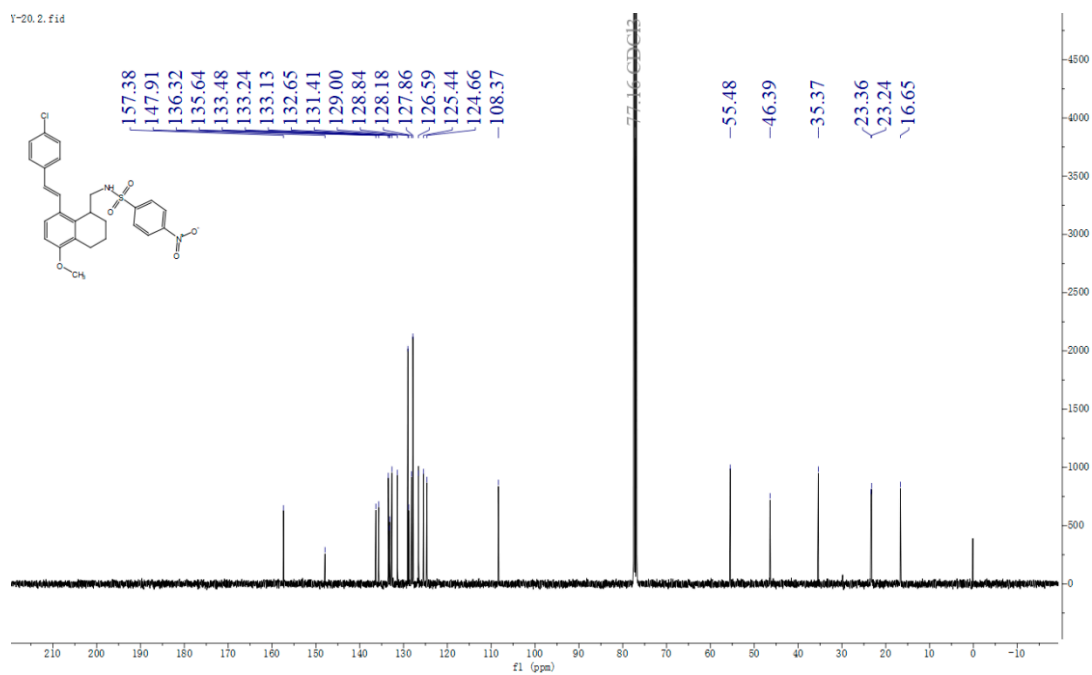

**Figure S68.** The <sup>13</sup>C spectrum (101MHz, CDCl<sub>3</sub>) of **2x**.

3 The  $^1\text{H}$  spectrum and  $^{13}\text{C}$  spectrum of 3, 5, 6 and 7.

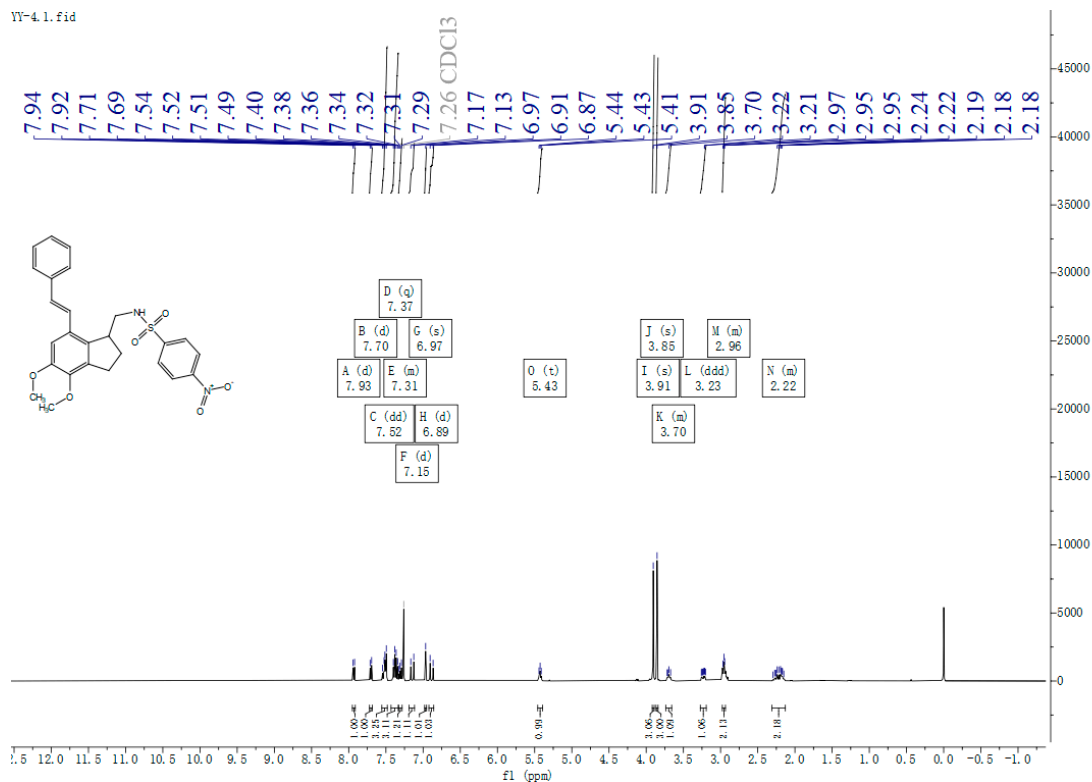

**Figure S69.** The  $^1\text{H}$  spectrum (400MHz,  $\text{CDCl}_3$ ) of 3.

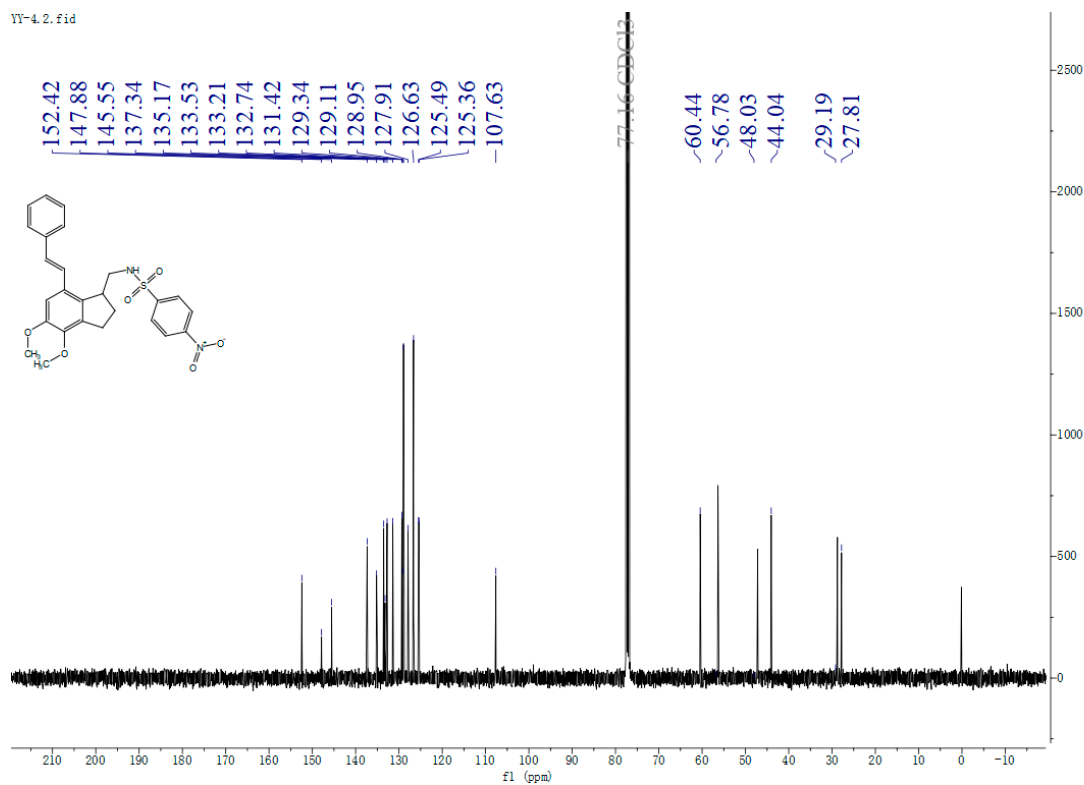

**Figure S70.** The  $^{13}\text{C}$  spectrum (101MHz,  $\text{CDCl}_3$ ) of 3.



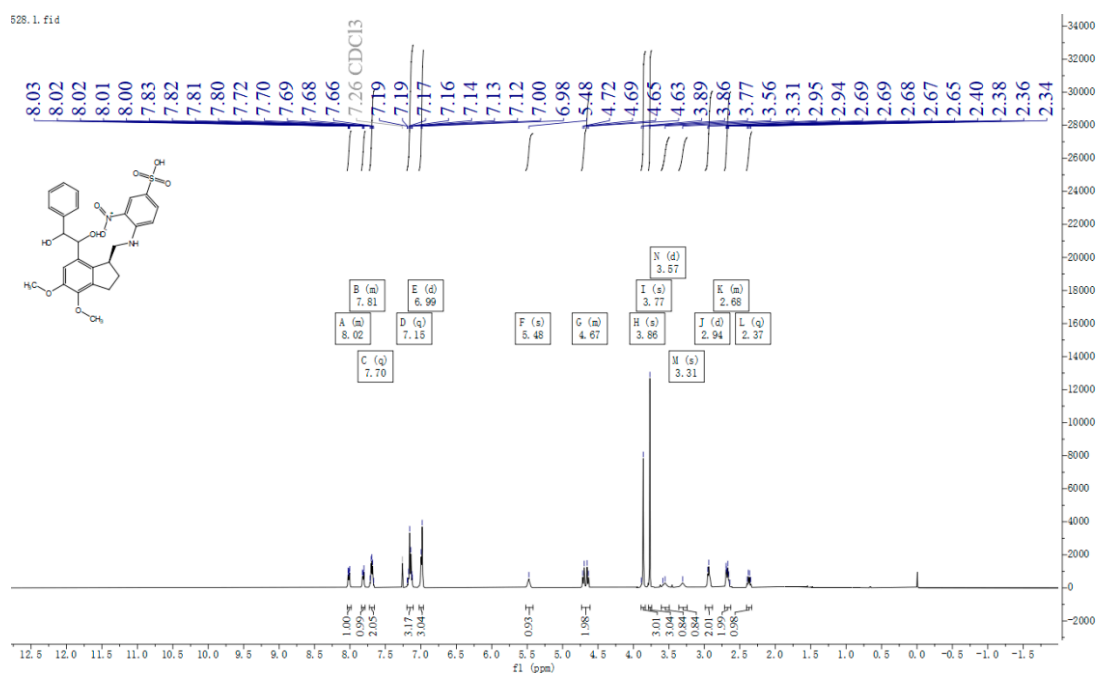

**Figure S71.** The  $^1\text{H}$  spectrum (400MHz,  $\text{CDCl}_3$ ) of **5**.

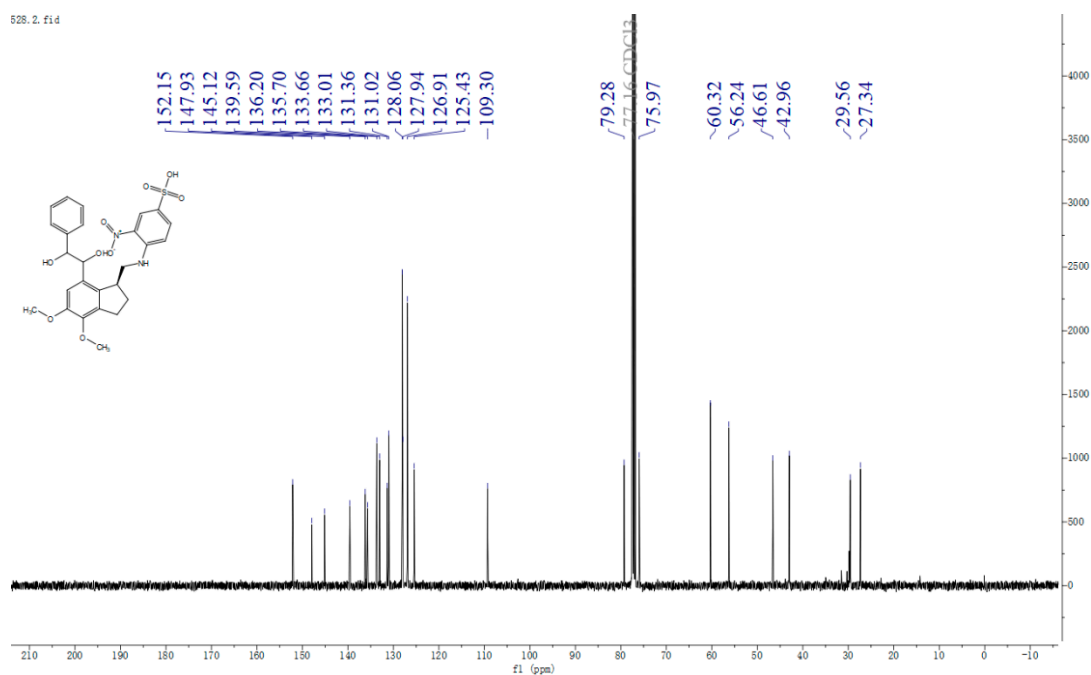

**Figure S72.** The  $^{13}\text{C}$  spectrum (101MHz,  $\text{CDCl}_3$ ) of **5**.

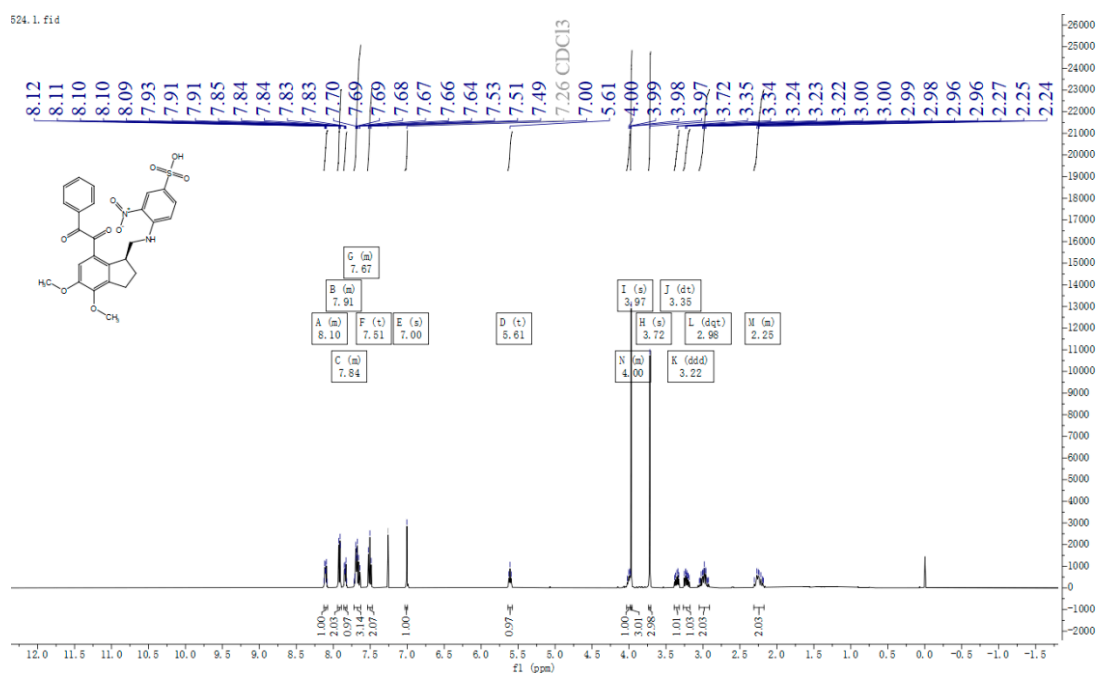

**Figure S73.** The  $^1\text{H}$  spectrum (400MHz,  $\text{CDCl}_3$ ) of **6**.

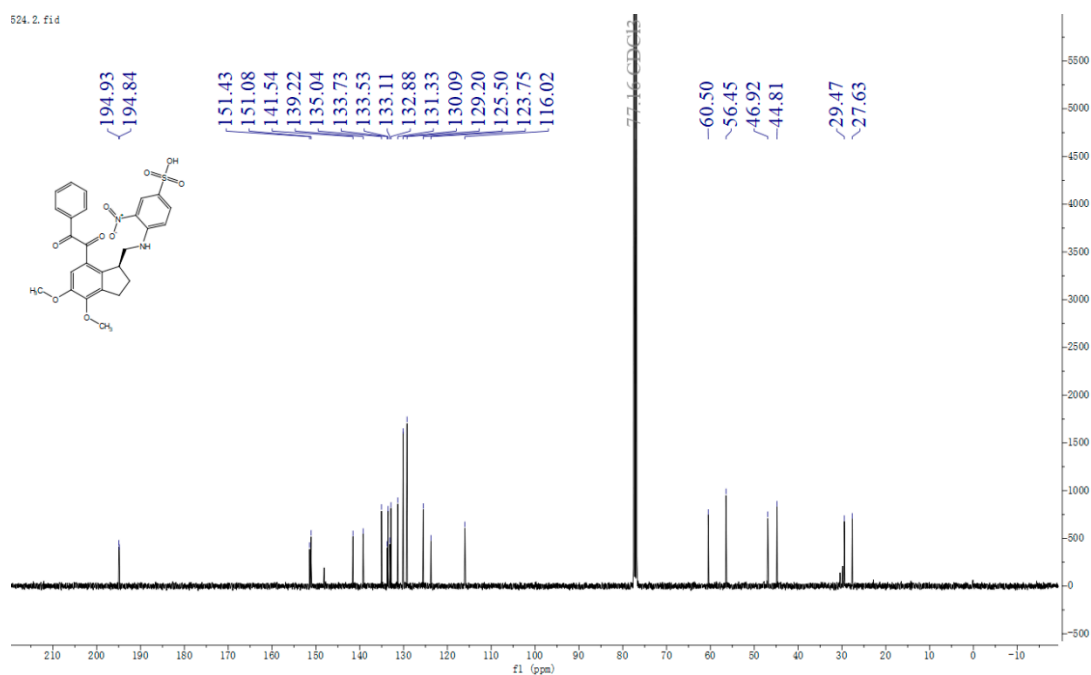

**Figure S74.** The  $^{13}\text{C}$  spectrum (101MHz,  $\text{CDCl}_3$ ) of **6**.

321-1.1.fid

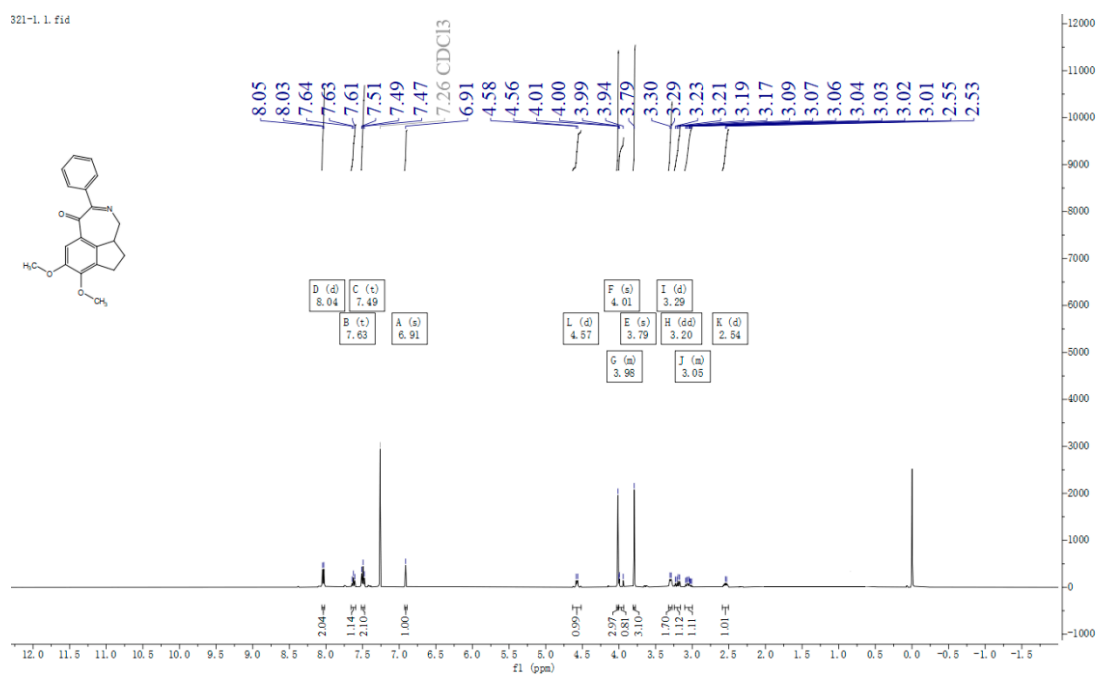

**Figure S75.** The <sup>1</sup>H spectrum (400MHz, CDCl<sub>3</sub>) of 7.

4. The HPLC data of **1a** and **2a** in Table 1.

a

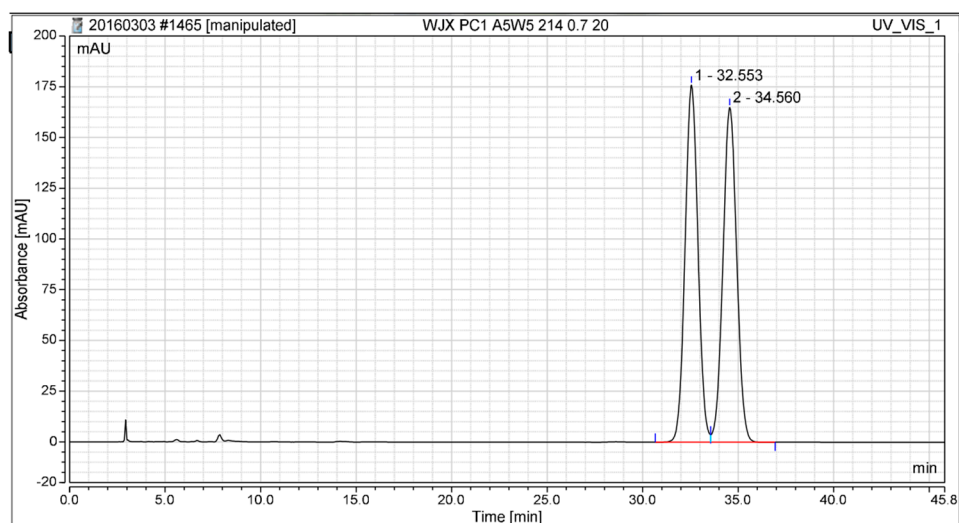

| Integration Results |                       |                 |               |                    |
|---------------------|-----------------------|-----------------|---------------|--------------------|
| No.                 | Retention Time<br>min | Area<br>mAU*min | Height<br>mAU | Relative Area<br>% |
| 1                   | 32.553                | 137.655         | 175.951       | 50.00              |
| 2                   | 34.560                | 137.635         | 165.000       | 50.00              |
| Total:              |                       | 275.290         | 340.951       | 100.00             |

b

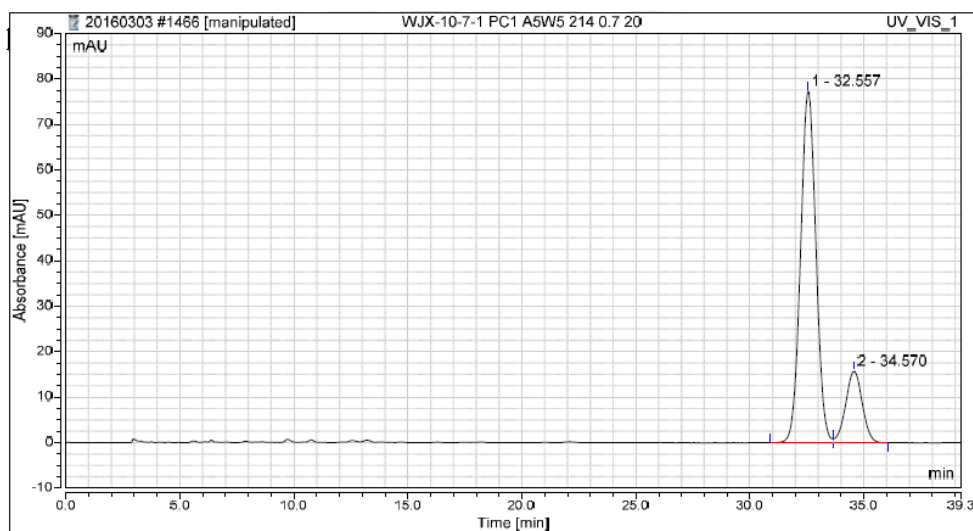

| Integration Results |                       |                 |               |                    |
|---------------------|-----------------------|-----------------|---------------|--------------------|
| No.                 | Retention Time<br>min | Area<br>mAU*min | Height<br>mAU | Relative Area<br>% |
| 1                   | 32.557                | 60.389          | 77.338        | 81.94              |
| 2                   | 34.570                | 13.309          | 15.781        | 18.06              |
| Total:              |                       | 73.699          | 93.119        | 100.00             |

Figure S76. The HPLC data of **1a** of entry 6 in Table 1.

a

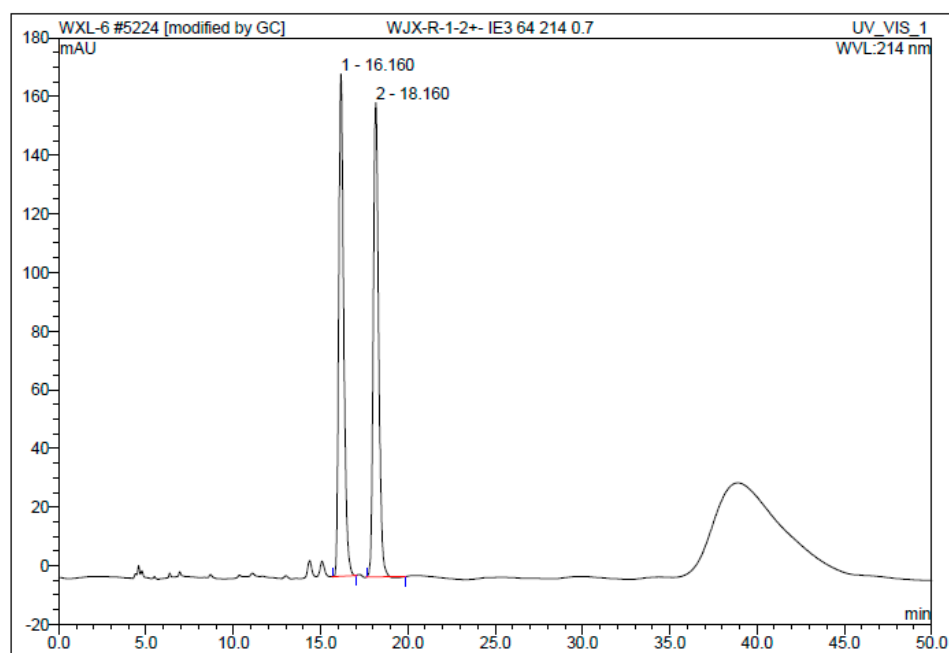

| No.           | Ret.Time<br>min | Peak Name | Height<br>mAU | Area<br>mAU*min | Rel.Area<br>% | Amount | Type |
|---------------|-----------------|-----------|---------------|-----------------|---------------|--------|------|
| 1             | 16.16           | n.a.      | 171.396       | 57.015          | 50.05         | n.a.   | BMB* |
| 2             | 18.16           | n.a.      | 161.771       | 56.898          | 49.95         | n.a.   | BMB* |
| <b>Total:</b> |                 |           | 333.167       | 113.913         | 100.00        | 0.000  |      |

b

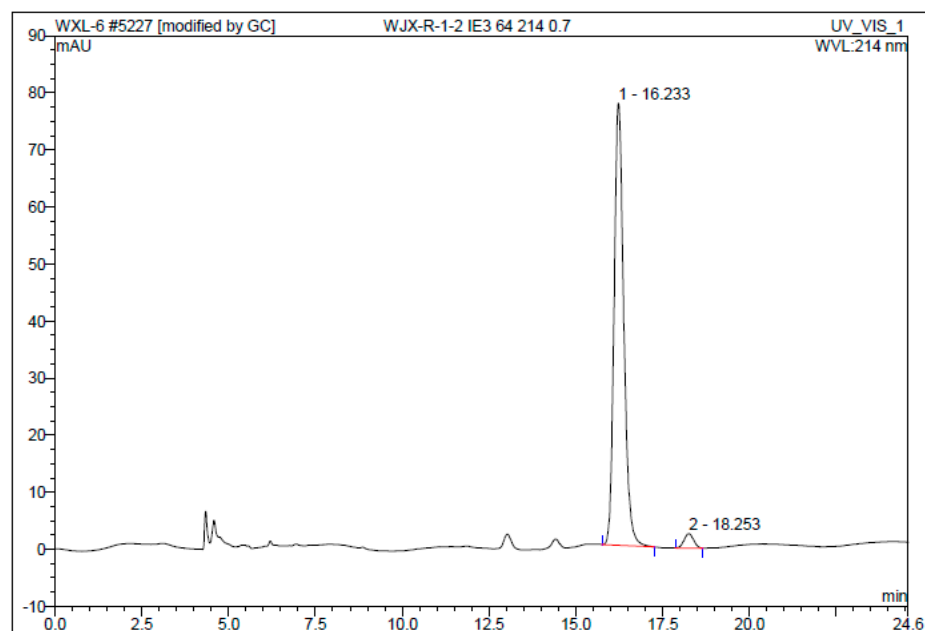

| No.           | Ret.Time<br>min | Peak Name | Height<br>mAU | Area<br>mAU*min | Rel.Area<br>% | Amount | Type |
|---------------|-----------------|-----------|---------------|-----------------|---------------|--------|------|
| 1             | 16.23           | n.a.      | 77.488        | 25.036          | 96.90         | n.a.   | BMB  |
| 2             | 18.25           | n.a.      | 2.522         | 0.801           | 3.10          | n.a.   | BMB  |
| <b>Total:</b> |                 |           | 80.010        | 25.837          | 100.00        | 0.000  |      |

Figure S77. The HPLC data of **2a** of entry 6 in Table 1.

5 The HPLC Data of **1ab-an** and **2b-n** in Scheme 1.

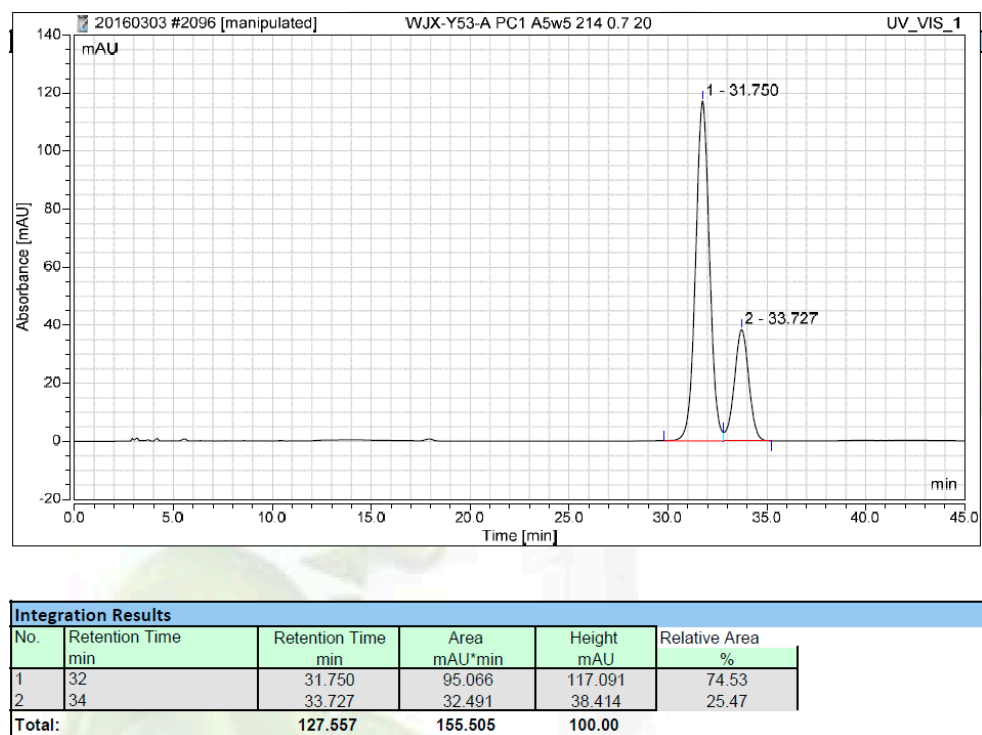

Figure S78. The HPLC data of **1ab** in Scheme 1.

a

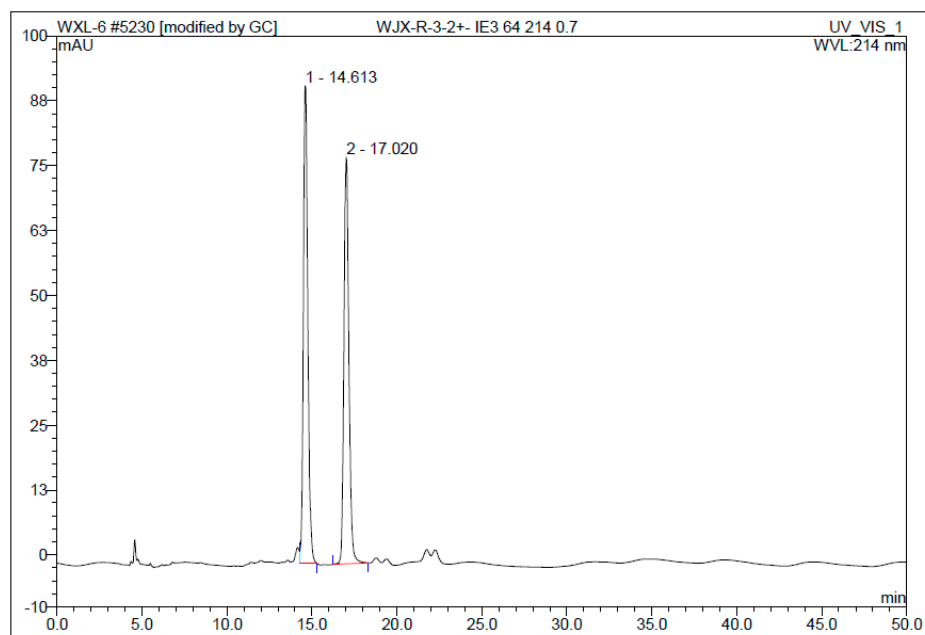

| No.    | Ret.Time<br>min | Peak Name | Height<br>mAU | Area<br>mAU*min | Rel.Area<br>% | Amount | Type |
|--------|-----------------|-----------|---------------|-----------------|---------------|--------|------|
| 1      | 14.61           | n.a.      | 92.089        | 27.747          | 51.16         | n.a.   | MB*  |
| 2      | 17.02           | n.a.      | 78.352        | 26.487          | 48.84         | n.a.   | BMB  |
| Total: |                 |           | 170.441       | 54.233          | 100.00        | 0.000  |      |

b

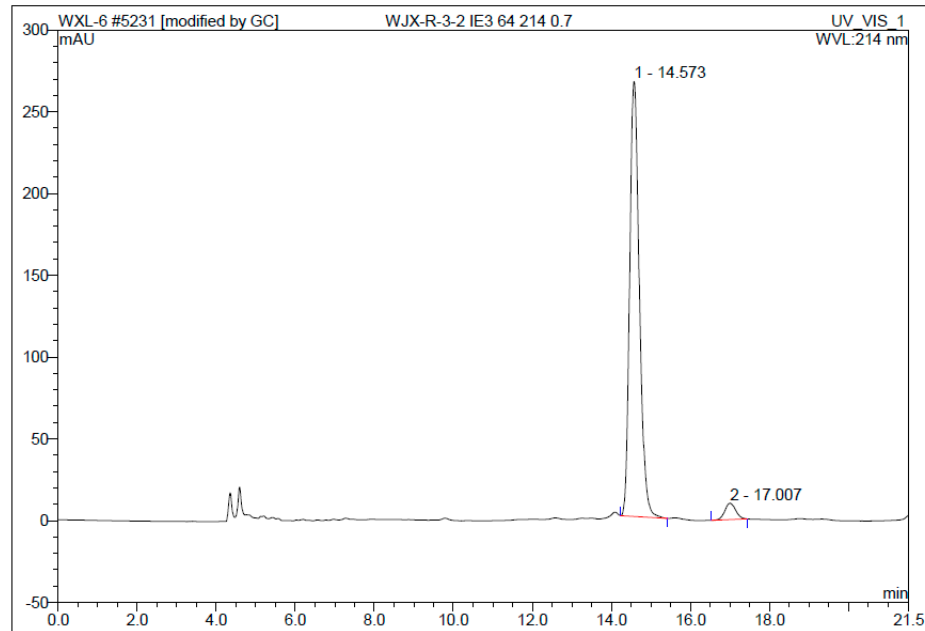

| No.    | Ret.Time<br>min | Peak Name | Height<br>mAU | Area<br>mAU*min | Rel.Area<br>% | Amount | Type |
|--------|-----------------|-----------|---------------|-----------------|---------------|--------|------|
| 1      | 14.57           | n.a.      | 266.005       | 75.194          | 95.96         | n.a.   | BMB* |
| 2      | 17.01           | n.a.      | 9.935         | 3.166           | 4.04          | n.a.   | BMB* |
| Total: |                 |           | 275.940       | 78.360          | 100.00        | 0.000  |      |

Figure S79. The HPLC data of **2b** in Scheme 1.

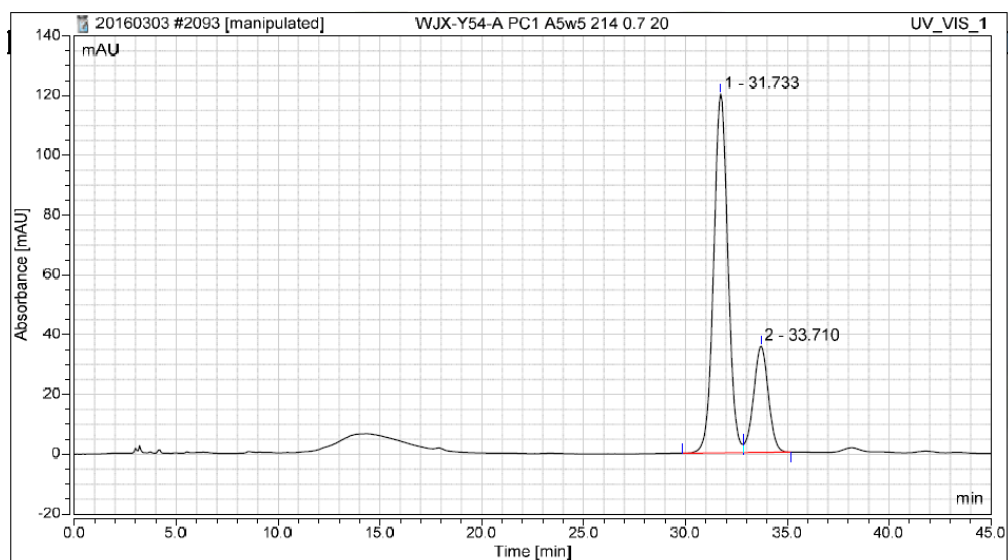

| Integration Results |                       |                       |                 |               |                    |
|---------------------|-----------------------|-----------------------|-----------------|---------------|--------------------|
| No.                 | Retention Time<br>min | Retention Time<br>min | Area<br>mAU*min | Height<br>mAU | Relative Area<br>% |
| 1                   | 32                    | 31.733                | 97.154          | 120.188       | 76.42              |
| 2                   | 34                    | 33.710                | 29.971          | 35.659        | 23.58              |
| Total:              |                       | 127.125               | 155.848         | 100.00        |                    |

Figure S80. The HPLC data of **1ac** in Scheme 1.



a

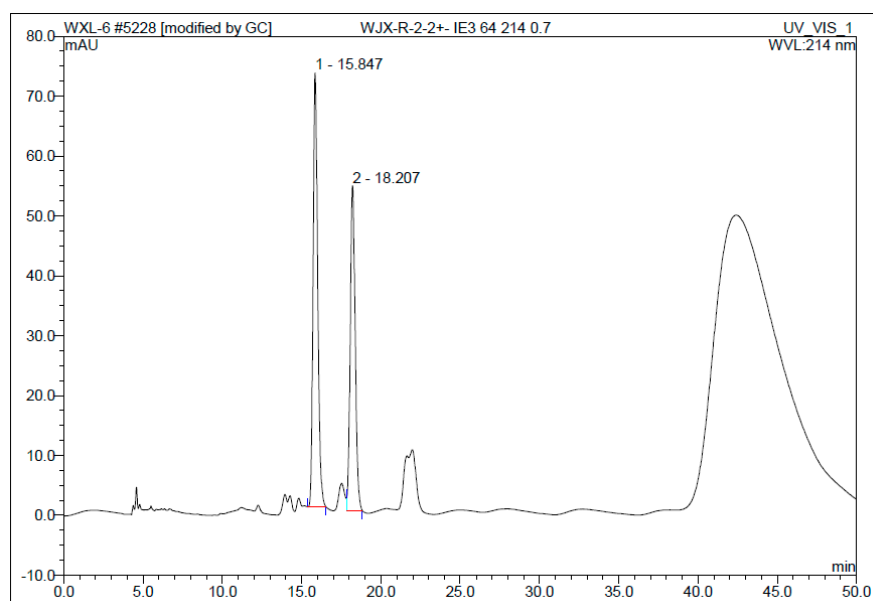

| No.           | Ret.Time<br>min | Peak Name | Height<br>mAU | Area<br>mAU*min | Rel.Area<br>% | Amount | Type |
|---------------|-----------------|-----------|---------------|-----------------|---------------|--------|------|
| 1             | 15.85           | n.a.      | 72.510        | 24.421          | 55.23         | n.a.   | BMB* |
| 2             | 18.21           | n.a.      | 54.260        | 19.799          | 44.77         | n.a.   | MB*  |
| <b>Total:</b> |                 |           | 126.770       | 44.219          | 100.00        | 0.000  |      |

b

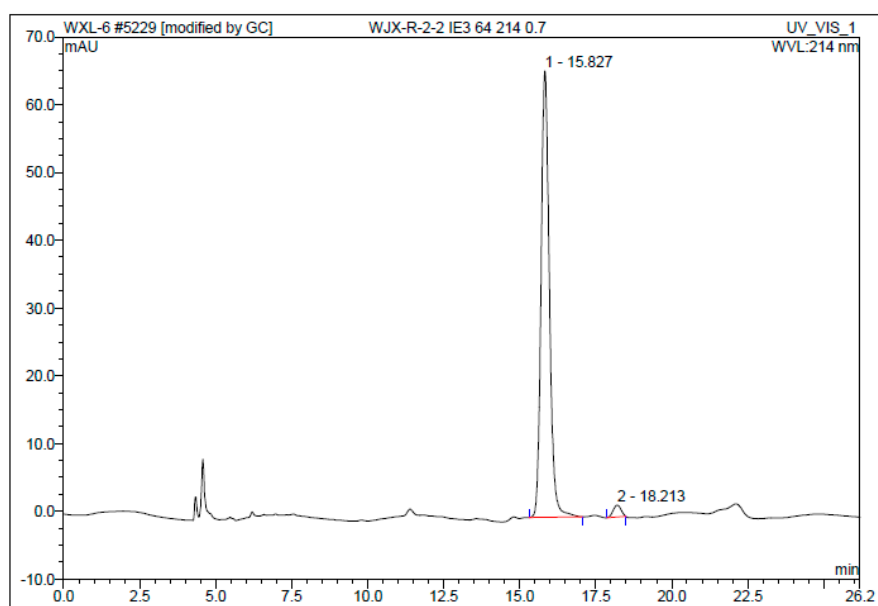

| No.           | Ret.Time<br>min | Peak Name | Height<br>mAU | Area<br>mAU*min | Rel.Area<br>% | Amount | Type |
|---------------|-----------------|-----------|---------------|-----------------|---------------|--------|------|
| 1             | 15.83           | n.a.      | 65.875        | 20.908          | 97.55         | n.a.   | BMB  |
| 2             | 18.21           | n.a.      | 1.753         | 0.526           | 2.45          | n.a.   | BMB* |
| <b>Total:</b> |                 |           | 67.628        | 21.434          | 100.00        | 0.000  |      |

**Figure S81.** The HPLC data of **2c** in Scheme 1.

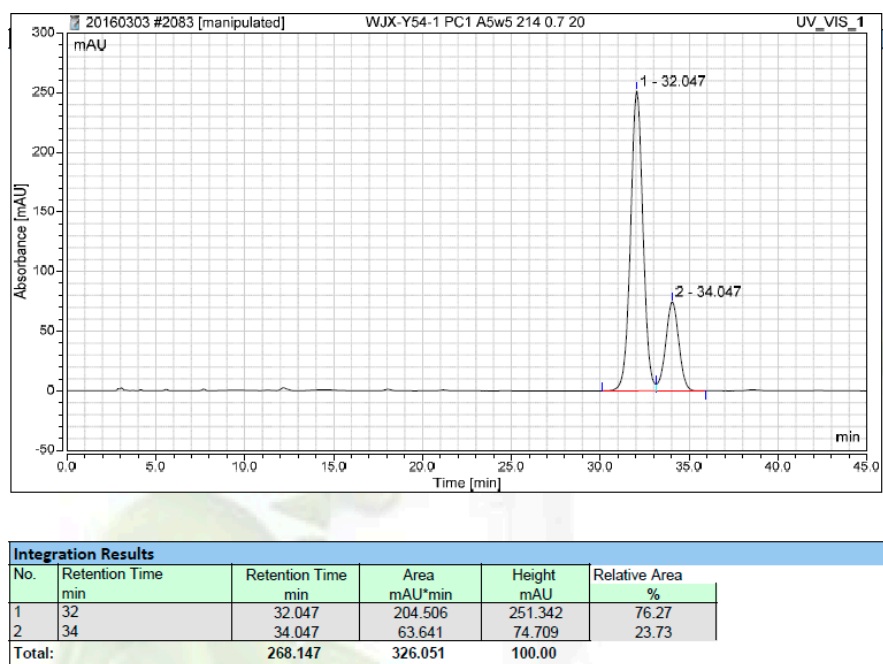

**Figure S82.** The HPLC data of **1ad** in Scheme 1.

a

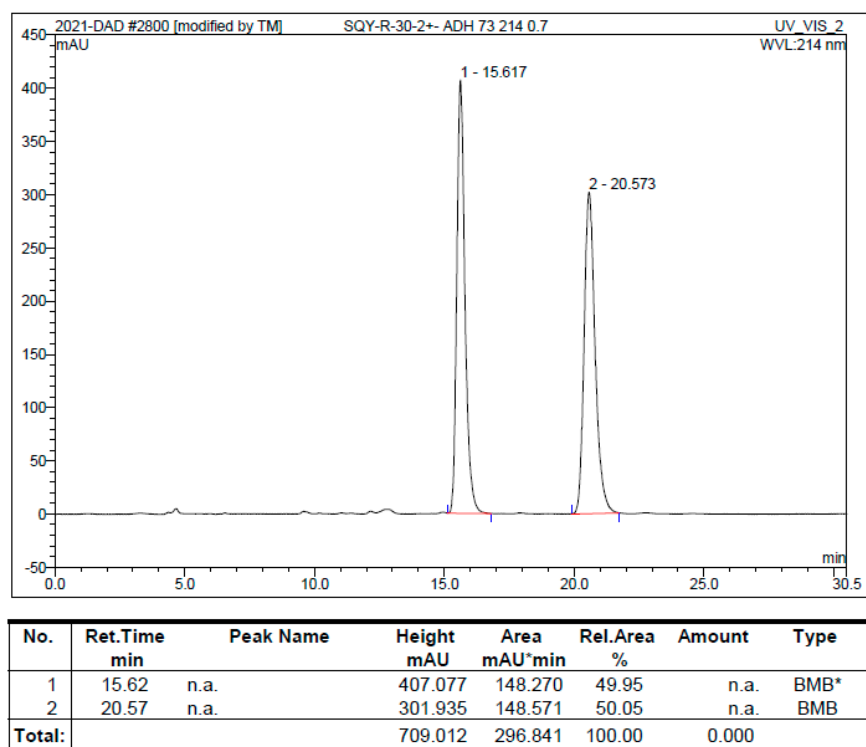

b

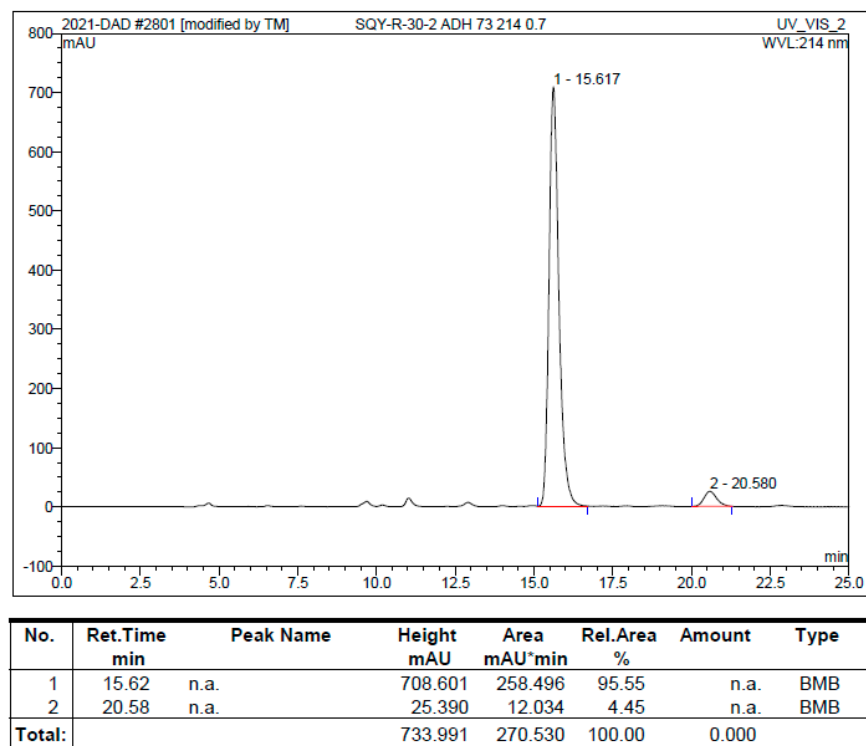

Figure S83. The HPLC data of **2d** in Scheme 1.

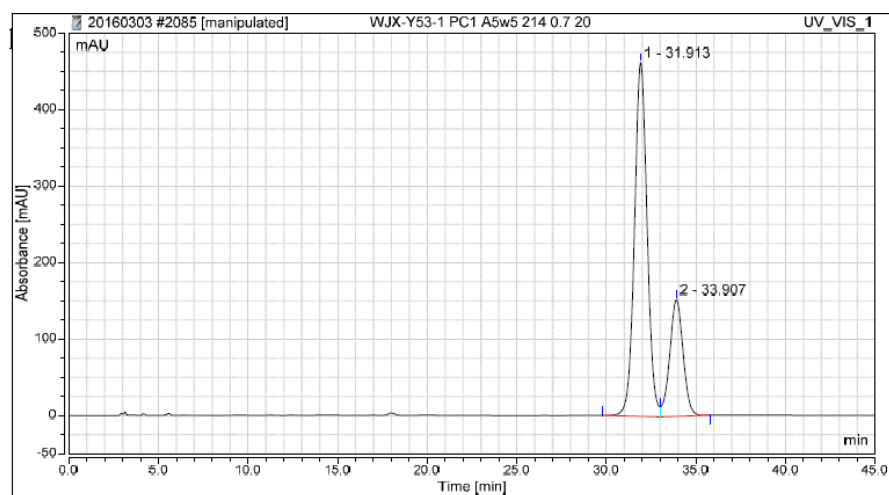

| Integration Results |                       |                       |                 |               |                    |
|---------------------|-----------------------|-----------------------|-----------------|---------------|--------------------|
| No.                 | Retention Time<br>min | Retention Time<br>min | Area<br>mAU*min | Height<br>mAU | Relative Area<br>% |
| 1                   | 32                    | 31.913                | 378.811         | 462.695       | 74.16              |
| 2                   | 34                    | 33.907                | 131.987         | 152.756       | 25.84              |
| Total:              |                       | 510.798               | 615.451         | 100.00        |                    |

**Figure S84.** The HPLC data of **1ae** in Scheme 1.

a

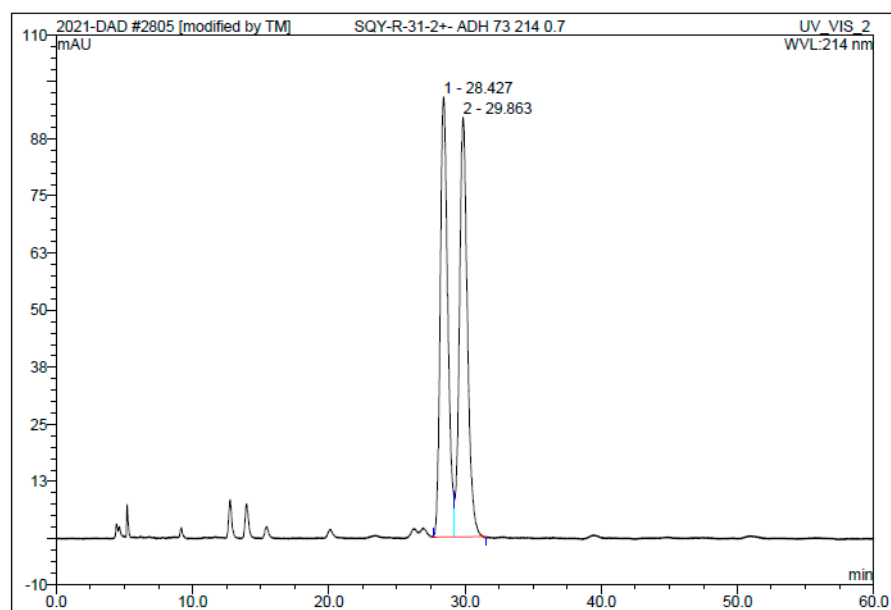

| No.    | Ret.Time<br>min | Peak Name | Height<br>mAU | Area<br>mAU*min | Rel.Area<br>% | Amount | Type |
|--------|-----------------|-----------|---------------|-----------------|---------------|--------|------|
| 1      | 28.43           | n.a.      | 96.336        | 61.657          | 49.69         | n.a.   | BM * |
| 2      | 29.86           | n.a.      | 91.844        | 62.436          | 50.31         | n.a.   | MB*  |
| Total: |                 |           | 188.179       | 124.093         | 100.00        | 0.000  |      |

b

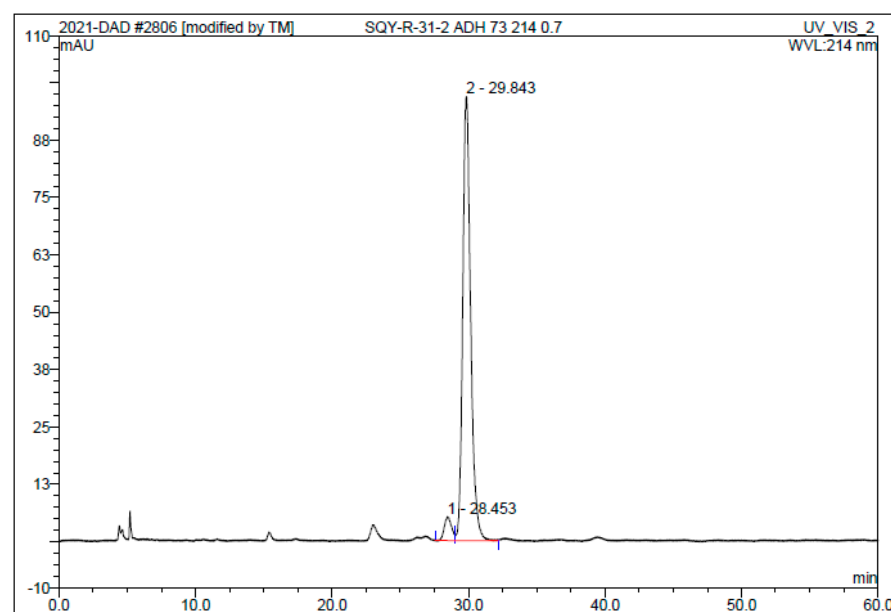

| No.    | Ret.Time<br>min | Peak Name | Height<br>mAU | Area<br>mAU*min | Rel.Area<br>% | Amount | Type |
|--------|-----------------|-----------|---------------|-----------------|---------------|--------|------|
| 1      | 28.45           | n.a.      | 5.188         | 3.150           | 4.63          | n.a.   | BM * |
| 2      | 29.84           | n.a.      | 96.727        | 64.928          | 95.37         | n.a.   | MB*  |
| Total: |                 |           | 101.915       | 68.078          | 100.00        | 0.000  |      |

Figure S85. The HPLC data of 2e in Scheme 1.

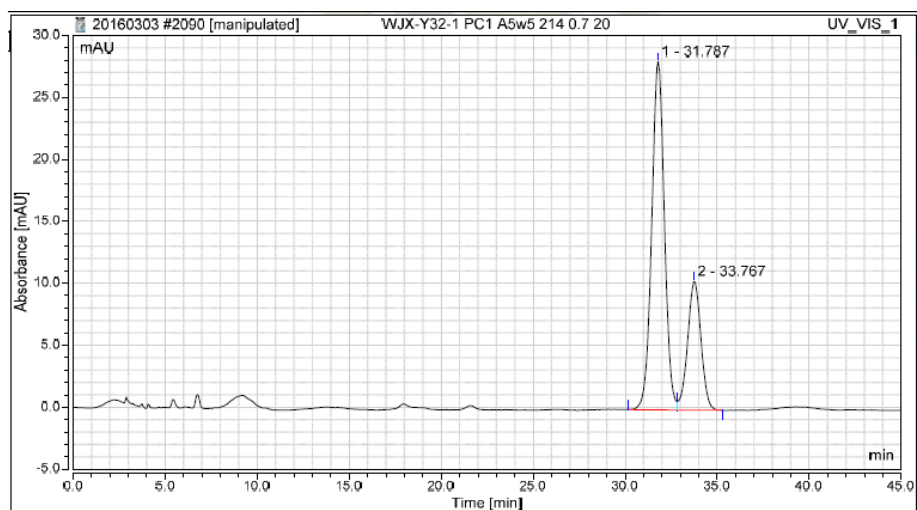

| Integration Results |                       |                       |                 |               |                    |
|---------------------|-----------------------|-----------------------|-----------------|---------------|--------------------|
| No.                 | Retention Time<br>min | Retention Time<br>min | Area<br>mAU*min | Height<br>mAU | Relative Area<br>% |
| 1                   | 32                    | 31.787                | 22.506          | 28.087        | 71.97              |
| 2                   | 34                    | 33.767                | 8.764           | 10.399        | 28.03              |
| Total:              |                       | 31.271                | 38.486          | 100.00        |                    |

**Figure S86.** The HPLC data of **1af** in Scheme 1.

a

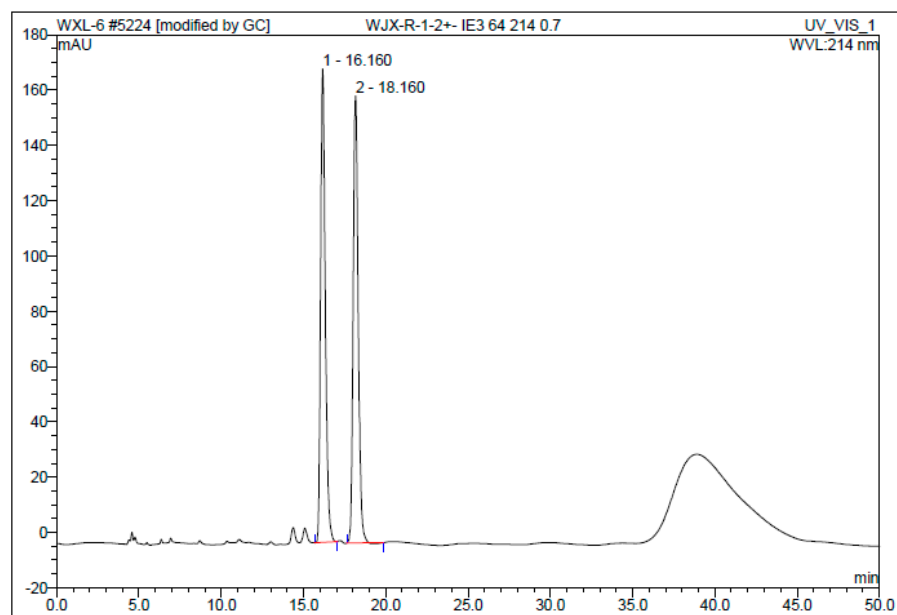

| No.           | Ret.Time<br>min | Peak Name | Height<br>mAU | Area<br>mAU*min | Rel.Area<br>% | Amount | Type |
|---------------|-----------------|-----------|---------------|-----------------|---------------|--------|------|
| 1             | 16.16           | n.a.      | 171.396       | 57.015          | 50.05         | n.a.   | BMB* |
| 2             | 18.16           | n.a.      | 161.771       | 56.898          | 49.95         | n.a.   | BMB* |
| <b>Total:</b> |                 |           | 333.167       | 113.913         | 100.00        | 0.000  |      |

b

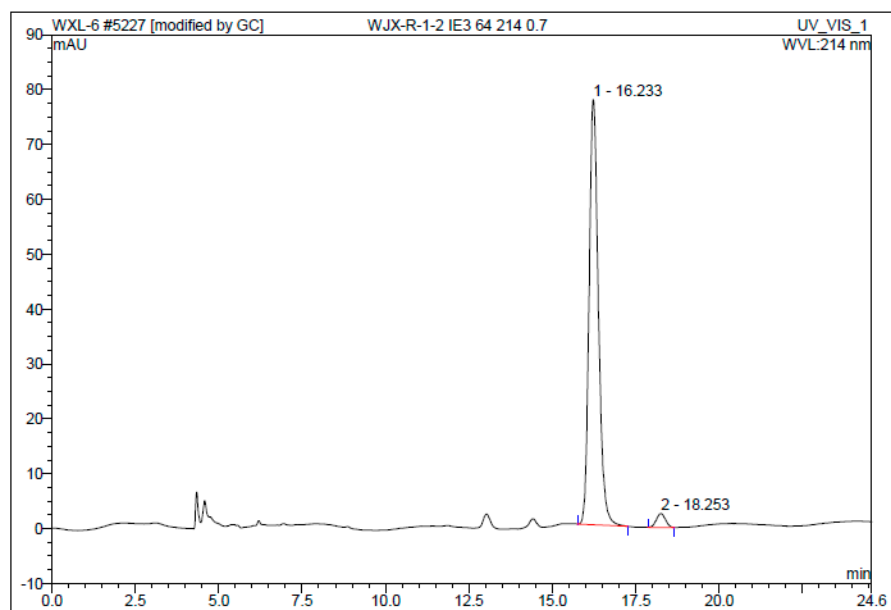

| No.           | Ret.Time<br>min | Peak Name | Height<br>mAU | Area<br>mAU*min | Rel.Area<br>% | Amount | Type |
|---------------|-----------------|-----------|---------------|-----------------|---------------|--------|------|
| 1             | 16.23           | n.a.      | 77.488        | 25.036          | 96.90         | n.a.   | BMB  |
| 2             | 18.25           | n.a.      | 2.522         | 0.801           | 3.10          | n.a.   | BMB  |
| <b>Total:</b> |                 |           | 80.010        | 25.837          | 100.00        | 0.000  |      |

Figure S87. The HPLC data of **2f** in Scheme 1.

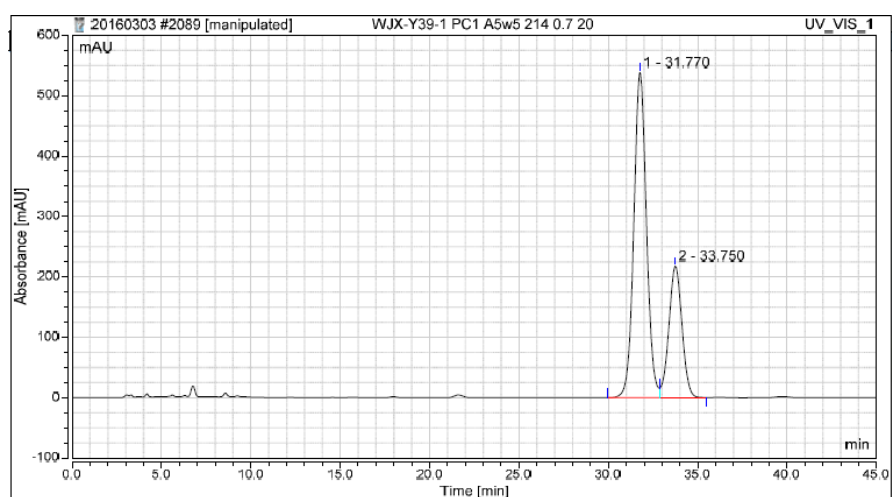

| Integration Results |                       |                       |                 |               |                    |
|---------------------|-----------------------|-----------------------|-----------------|---------------|--------------------|
| No.                 | Retention Time<br>min | Retention Time<br>min | Area<br>mAU*min | Height<br>mAU | Relative Area<br>% |
| 1                   | 32                    | 31.770                | 440.427         | 538.262       | 70.46              |
| 2                   | 34                    | 33.750                | 184.674         | 217.817       | 29.54              |
| Total:              |                       | 625.102               | 756.078         | 100.00        |                    |

**Figure S88.** The HPLC data of **1ag** in Scheme 1.



a

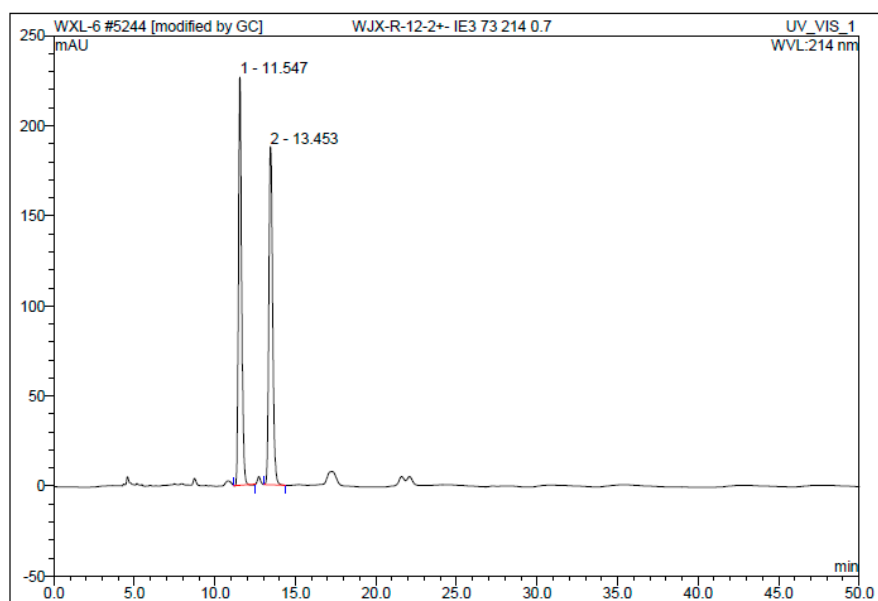

| No.           | Ret.Time<br>min | Peak Name | Height<br>mAU | Area<br>mAU*min | Rel.Area<br>% | Amount | Type |
|---------------|-----------------|-----------|---------------|-----------------|---------------|--------|------|
| 1             | 11.55           | n.a.      | 226.585       | 52.036          | 50.49         | n.a.   | BMB* |
| 2             | 13.45           | n.a.      | 187.758       | 51.029          | 49.51         | n.a.   | BMB* |
| <b>Total:</b> |                 |           | 414.343       | 103.065         | 100.00        | 0.000  |      |

b

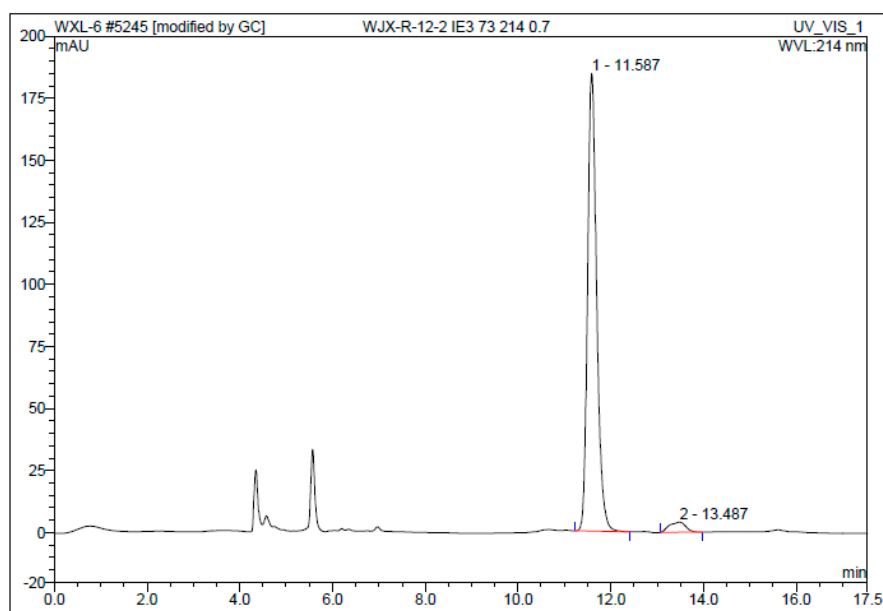

| No.           | Ret.Time<br>min | Peak Name | Height<br>mAU | Area<br>mAU*min | Rel.Area<br>% | Amount | Type |
|---------------|-----------------|-----------|---------------|-----------------|---------------|--------|------|
| 1             | 11.59           | n.a.      | 184.389       | 41.907          | 96.20         | n.a.   | BMB  |
| 2             | 13.49           | n.a.      | 4.034         | 1.657           | 3.80          | n.a.   | BMB* |
| <b>Total:</b> |                 |           | 188.423       | 43.564          | 100.00        | 0.000  |      |

Figure S89. The HPLC data of **2g** in Scheme 1.

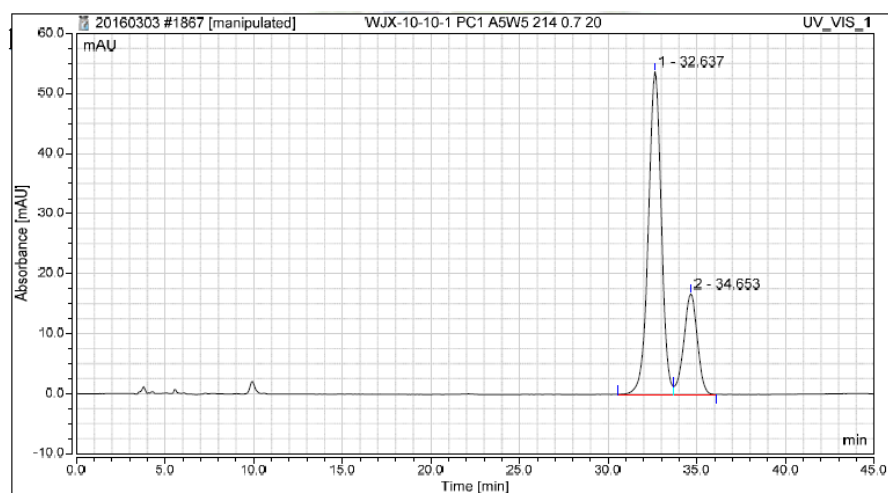

| Integration Results |                       |                       |                 |               |                    |
|---------------------|-----------------------|-----------------------|-----------------|---------------|--------------------|
| No.                 | Retention Time<br>min | Retention Time<br>min | Area<br>mAU*min | Height<br>mAU | Relative Area<br>% |
| 1                   | 33                    | 32.637                | 45.424          | 53.781        | 75.44              |
| 2                   | 35                    | 34.653                | 14.791          | 16.760        | 24.56              |
| Total:              |                       | 60.216                | 70.541          | 100.00        |                    |

**Figure S90.** The HPLC data of **1ah** in Scheme 1.

a

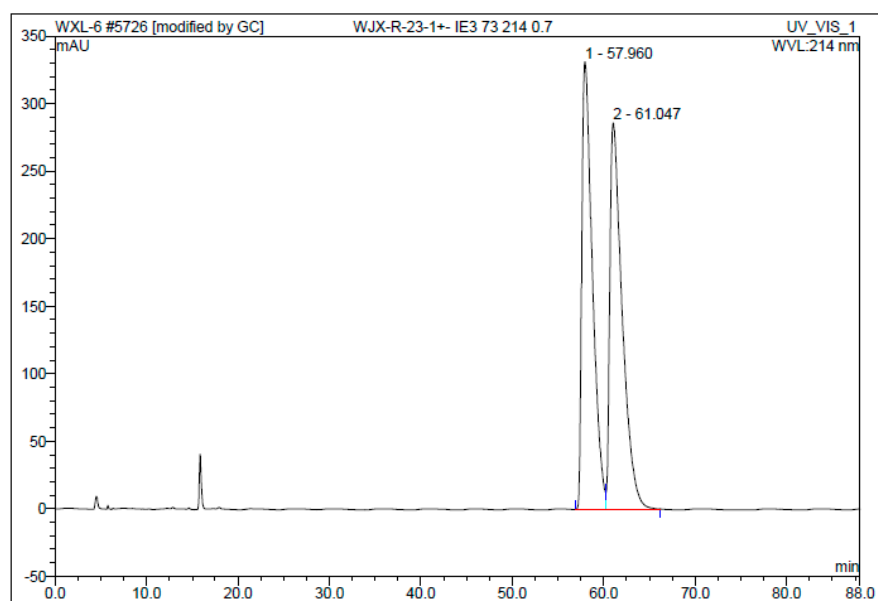

| No.    | Ret.Time<br>min | Peak Name | Height<br>mAU | Area<br>mAU*min | Rel.Area<br>% | Amount | Type |
|--------|-----------------|-----------|---------------|-----------------|---------------|--------|------|
| 1      | 57.96           | n.a.      | 331.591       | 442.612         | 49.58         | n.a.   | BM * |
| 2      | 61.05           | n.a.      | 286.148       | 450.117         | 50.42         | n.a.   | MB*  |
| Total: |                 |           | 617.739       | 892.729         | 100.00        | 0.000  |      |

b

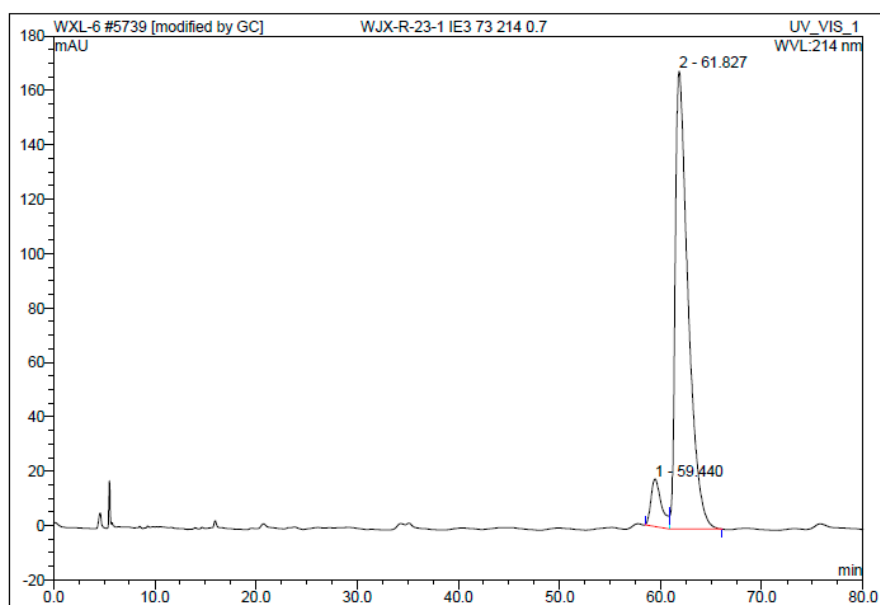

| No.    | Ret.Time<br>min | Peak Name | Height<br>mAU | Area<br>mAU*min | Rel.Area<br>% | Amount | Type |
|--------|-----------------|-----------|---------------|-----------------|---------------|--------|------|
| 1      | 59.44           | n.a.      | 17.472        | 20.980          | 7.79          | n.a.   | BM * |
| 2      | 61.83           | n.a.      | 168.376       | 248.168         | 92.21         | n.a.   | MB*  |
| Total: |                 |           | 185.848       | 269.148         | 100.00        | 0.000  |      |

**Figure S91.** The HPLC data of **2h** in Scheme 1.

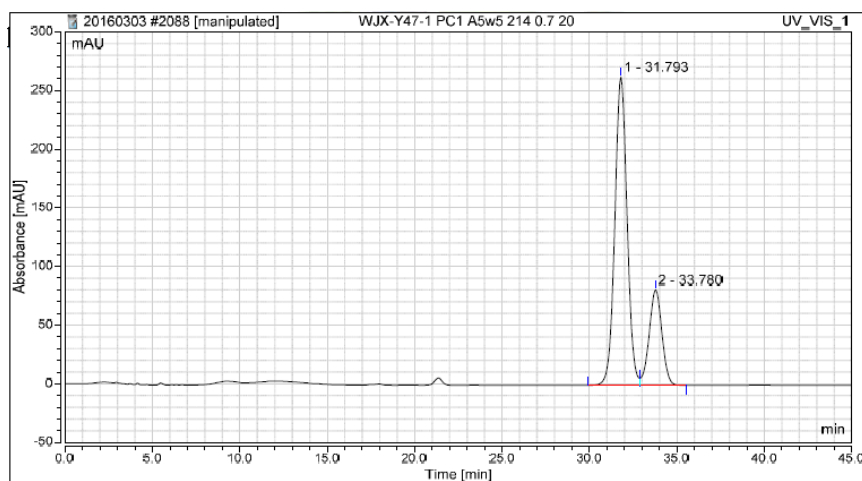

| Integration Results |                       |                       |                 |               |                    |
|---------------------|-----------------------|-----------------------|-----------------|---------------|--------------------|
| No.                 | Retention Time<br>min | Retention Time<br>min | Area<br>mAU*min | Height<br>mAU | Relative Area<br>% |
| 1                   | 32                    | 31.793                | 213.273         | 263.063       | 75.54              |
| 2                   | 34                    | 33.780                | 69.072          | 81.512        | 24.46              |
| Total:              |                       | 282.346               | 344.576         | 100.00        |                    |

**Figure S92.** The HPLC data of **1ai** in Scheme 1.

a

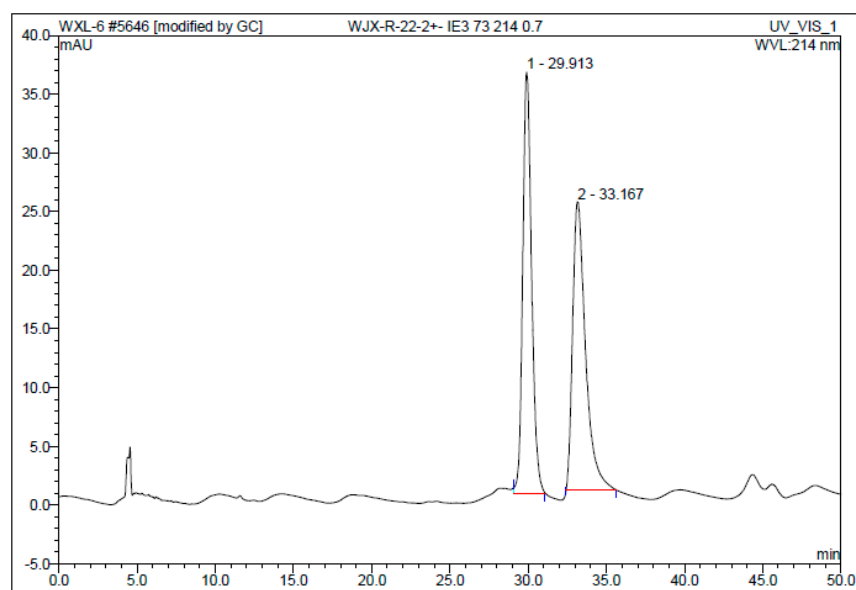

| No.    | Ret.Time<br>min | Peak Name | Height<br>mAU | Area<br>mAU*min | Rel.Area<br>% | Amount | Type |
|--------|-----------------|-----------|---------------|-----------------|---------------|--------|------|
| 1      | 29.91           | n.a.      | 35.858        | 23.484          | 50.12         | n.a.   | MB*  |
| 2      | 33.17           | n.a.      | 24.521        | 23.371          | 49.88         | n.a.   | MB*  |
| Total: |                 |           | 60.379        | 46.856          | 100.00        | 0.000  |      |

b

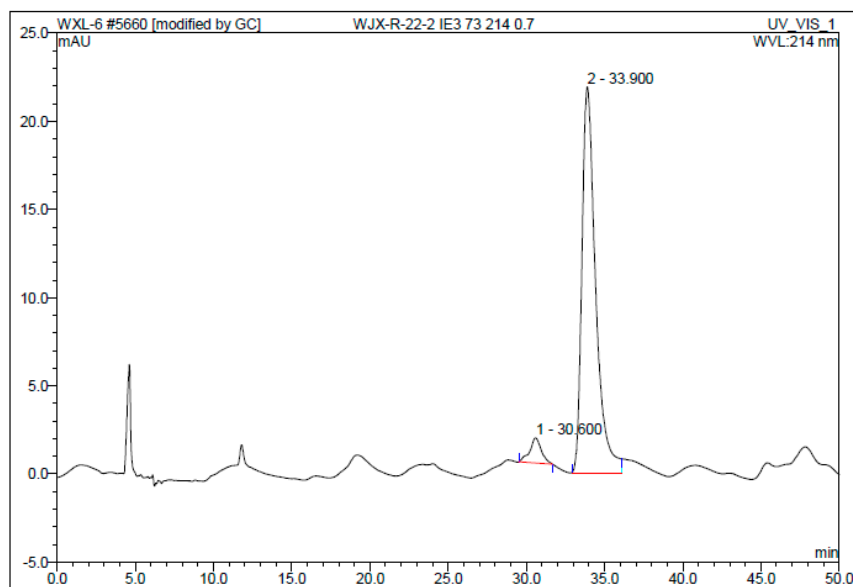

| No.    | Ret.Time<br>min | Peak Name | Height<br>mAU | Area<br>mAU*min | Rel.Area<br>% | Amount | Type |
|--------|-----------------|-----------|---------------|-----------------|---------------|--------|------|
| 1      | 30.60           | n.a.      | 1.431         | 1.235           | 5.27          | n.a.   | BMB  |
| 2      | 33.90           | n.a.      | 21.895        | 22.203          | 94.73         | n.a.   | BM * |
| Total: |                 |           | 23.326        | 23.438          | 100.00        | 0.000  |      |

Figure S93. The HPLC data of **2i** in Scheme 1.

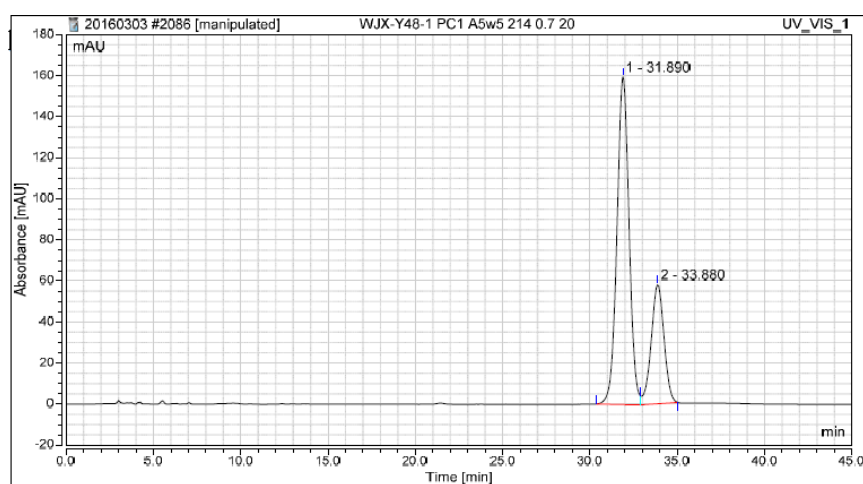

| Integration Results |                       |                       |                 |               |                    |
|---------------------|-----------------------|-----------------------|-----------------|---------------|--------------------|
| No.                 | Retention Time<br>min | Retention Time<br>min | Area<br>mAU*min | Height<br>mAU | Relative Area<br>% |
| 1                   | 32                    | 31.890                | 127.921         | 159.693       | 72.08              |
| 2                   | 34                    | 33.880                | 49.558          | 58.029        | 27.92              |
| Total:              |                       | 177.479               | 217.722         | 100.00        |                    |

**Figure S94.** The HPLC data of **1aj** in Scheme 1.

a

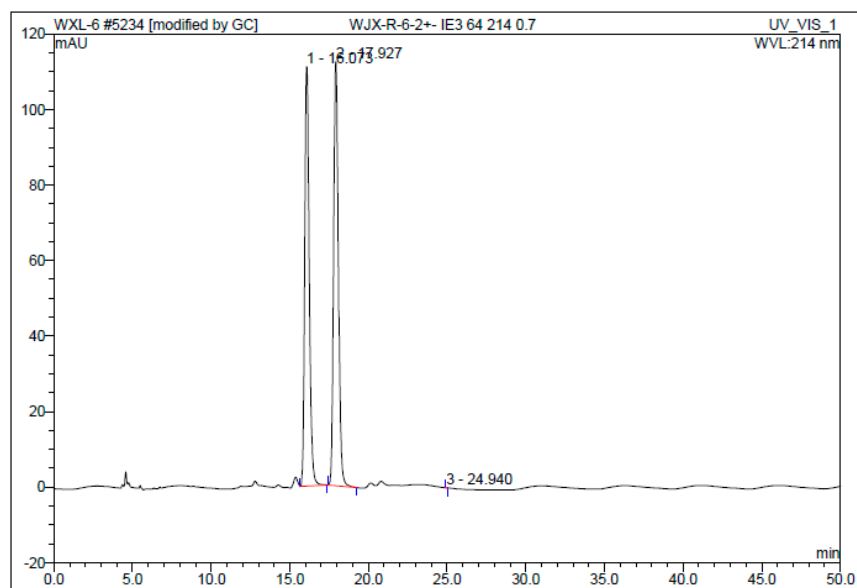

| No.    | Ret.Time<br>min | Peak Name | Height<br>mAU | Area<br>mAU*min | Rel.Area<br>% | Amount | Type |
|--------|-----------------|-----------|---------------|-----------------|---------------|--------|------|
| 1      | 16.07           | n.a.      | 111.085       | 36.946          | 48.36         | n.a.   | BMB* |
| 2      | 17.93           | n.a.      | 112.280       | 39.458          | 51.64         | n.a.   | BMB  |
| 3      | 24.94           | n.a.      | 0.006         | 0.000           | 0.00          | n.a.   | BMB* |
| Total: |                 |           | 223.371       | 76.405          | 100.00        | 0.000  |      |

b

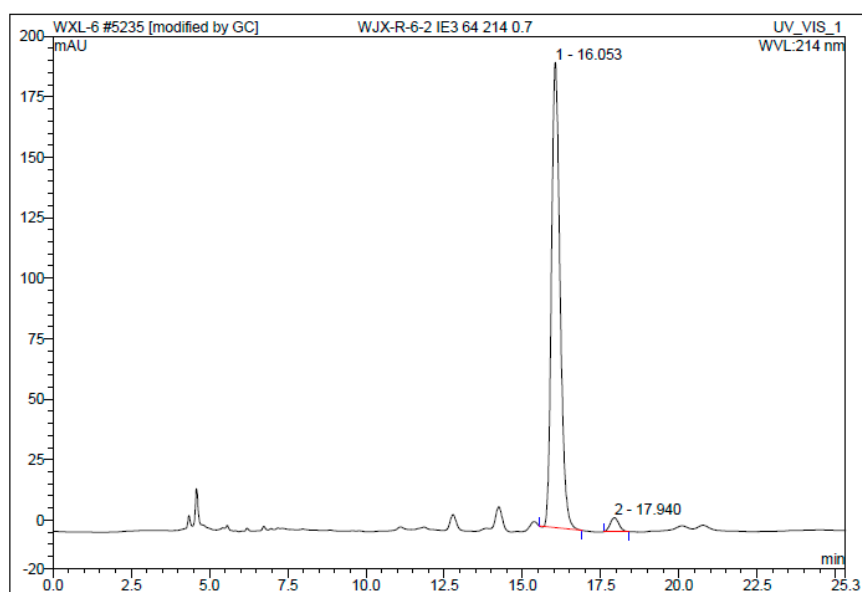

| No.    | Ret.Time<br>min | Peak Name | Height<br>mAU | Area<br>mAU*min | Rel.Area<br>% | Amount | Type |
|--------|-----------------|-----------|---------------|-----------------|---------------|--------|------|
| 1      | 16.05           | n.a.      | 192.285       | 61.001          | 97.04         | n.a.   | BMB* |
| 2      | 17.94           | n.a.      | 5.746         | 1.859           | 2.96          | n.a.   | BMB* |
| Total: |                 |           | 198.030       | 62.860          | 100.00        | 0.000  |      |

Figure S95. The HPLC data of **2j** in Scheme 1.

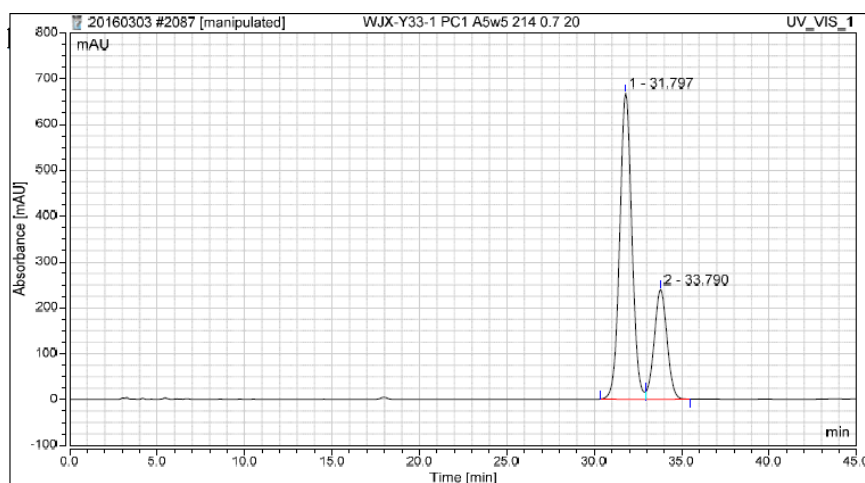

| Integration Results |                       |                       |                 |               |                    |
|---------------------|-----------------------|-----------------------|-----------------|---------------|--------------------|
| No.                 | Retention Time<br>min | Retention Time<br>min | Area<br>mAU*min | Height<br>mAU | Relative Area<br>% |
| 1                   | 32                    | 31.797                | 539.825         | 667.940       | 72.66              |
| 2                   | 34                    | 33.790                | 203.168         | 239.790       | 27.34              |
| Total:              |                       | 742.993               | 907.730         | 100.00        |                    |

**Figure S96.** The HPLC data of **1ak** in Scheme 1.



a

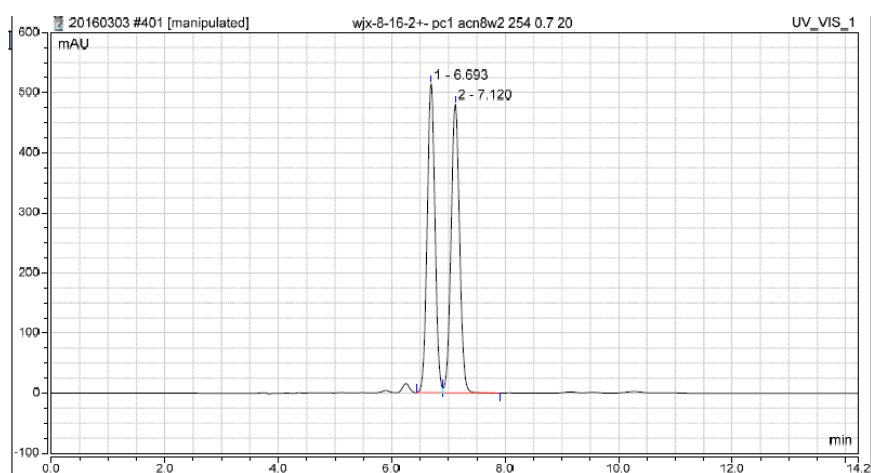

| Integration Results |                       |                 |               |                    |
|---------------------|-----------------------|-----------------|---------------|--------------------|
| No.                 | Retention Time<br>min | Area<br>mAU*min | Height<br>mAU | Relative Area<br>% |
| 1                   | 6.693                 | 82.030          | 514.254       | 49.54              |
| 2                   | 7.120                 | 83.562          | 480.307       | 50.46              |
| Total:              |                       | 165.591         | 994.561       | 100.00             |

b

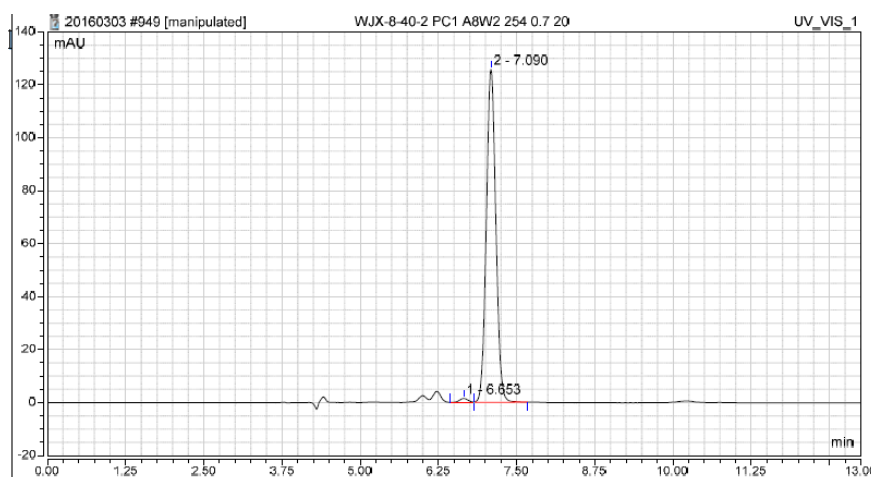

| Integration Results |                       |                 |               |                    |
|---------------------|-----------------------|-----------------|---------------|--------------------|
| No.                 | Retention Time<br>min | Area<br>mAU*min | Height<br>mAU | Relative Area<br>% |
| 1                   | 6.653                 | 0.222           | 1.435         | 0.99               |
| 2                   | 7.090                 | 22.120          | 125.734       | 99.01              |
| Total:              |                       | 22.342          | 127.169       | 100.00             |

Figure S97. The HPLC data of **2k** in Scheme 1.

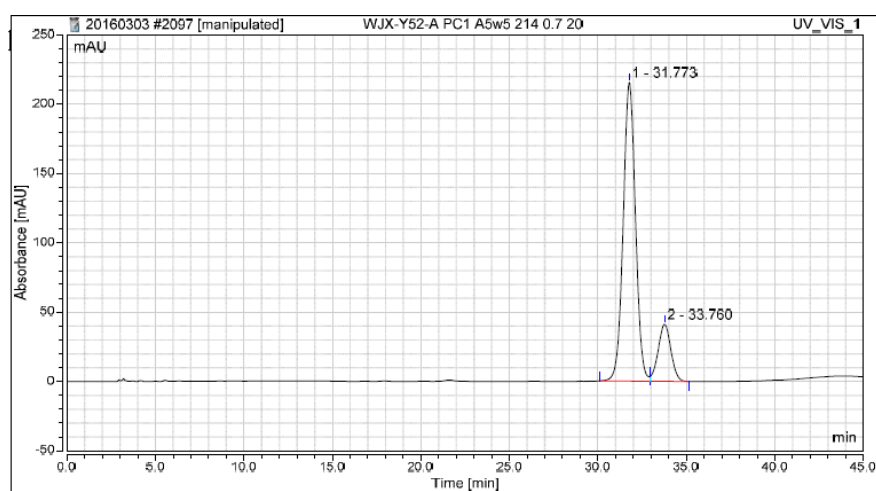

| Integration Results |                       |                       |                 |               |                    |
|---------------------|-----------------------|-----------------------|-----------------|---------------|--------------------|
| No.                 | Retention Time<br>min | Retention Time<br>min | Area<br>mAU*min | Height<br>mAU | Relative Area<br>% |
| 1                   | 32                    | 31.773                | 172.983         | 215.444       | 83.44              |
| 2                   | 34                    | 33.760                | 34.340          | 41.234        | 16.56              |
| Total:              |                       | 207.323               | 256.678         | 100.00        |                    |

**Figure S98.** The HPLC data of **1aI** in Scheme 1.

a

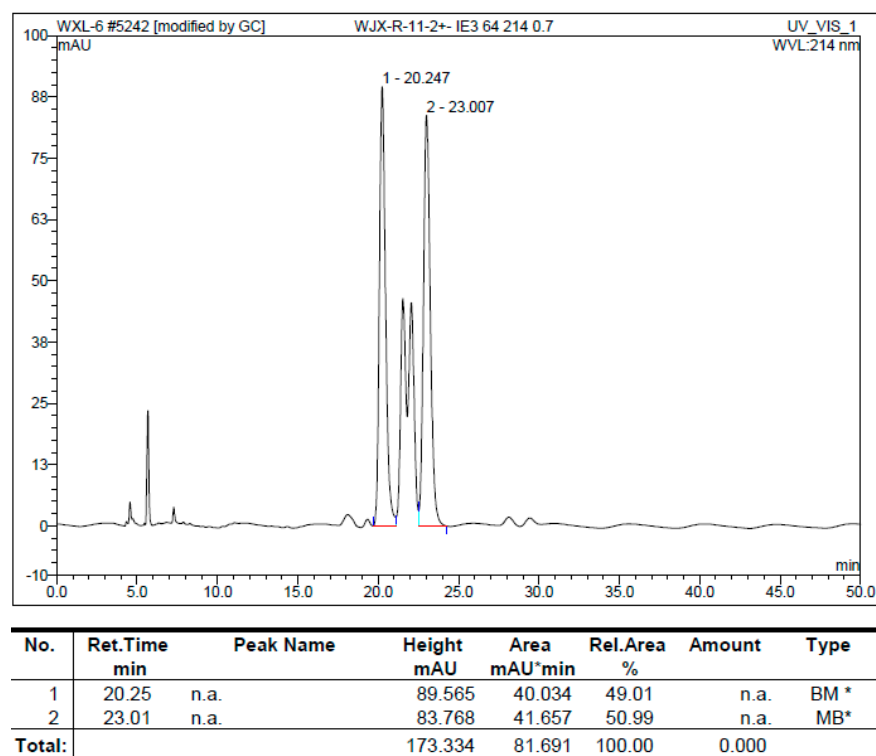

b

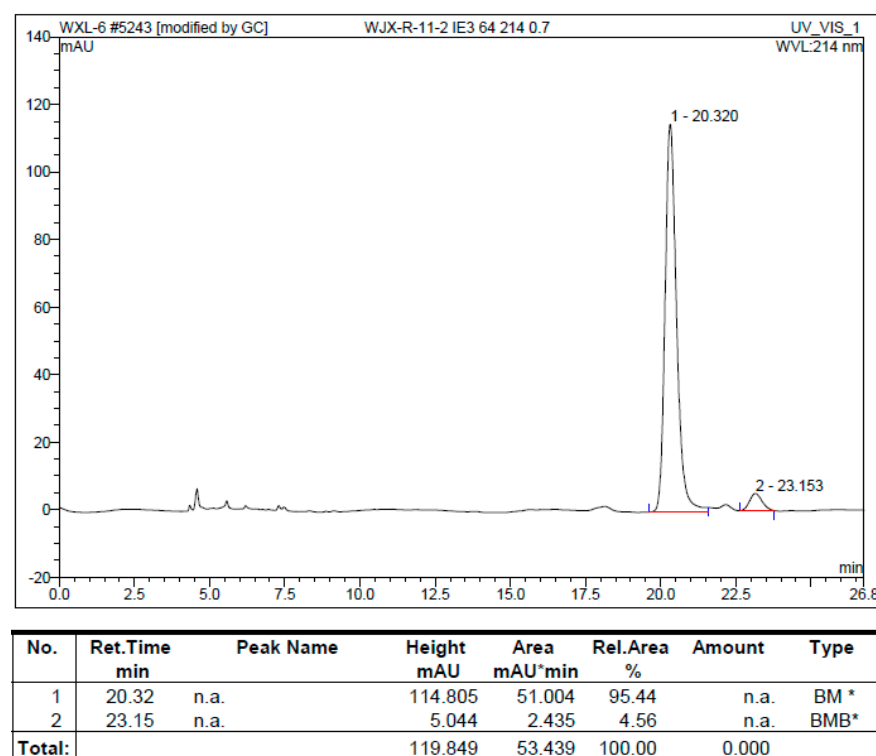

Figure S99. The HPLC data of **2l** in Scheme 1.

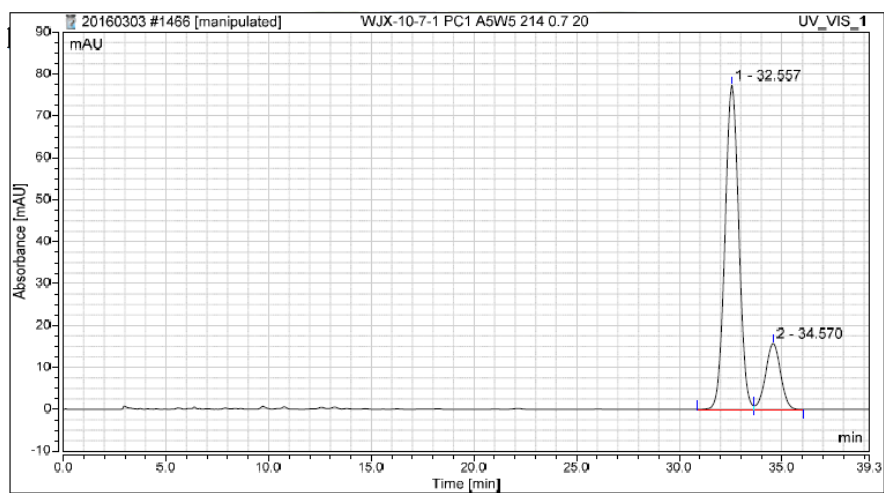

| Integration Results |                       |                       |                 |               |                    |
|---------------------|-----------------------|-----------------------|-----------------|---------------|--------------------|
| No.                 | Retention Time<br>min | Retention Time<br>min | Area<br>mAU*min | Height<br>mAU | Relative Area<br>% |
| 1                   | 33                    | 32.557                | 60.389          | 77.338        | 81.94              |
| 2                   | 35                    | 34.570                | 13.309          | 15.781        | 18.06              |
| Total:              |                       | 73.699                | 93.119          | 100.00        |                    |

**Figure S100.** The HPLC data of **1am** in Scheme 1.

a

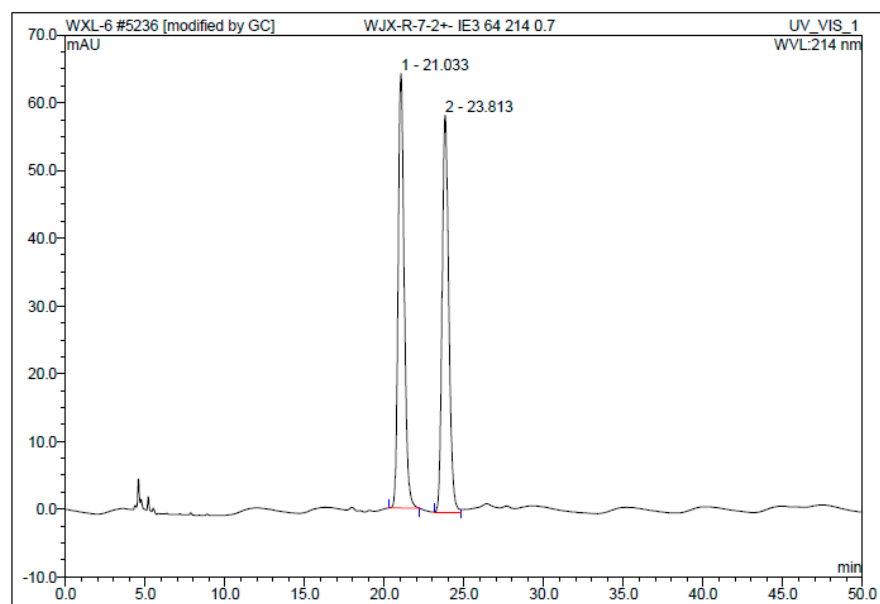

| No.    | Ret.Time<br>min | Peak Name | Height<br>mAU | Area<br>mAU*min | Rel.Area<br>% | Amount | Type |
|--------|-----------------|-----------|---------------|-----------------|---------------|--------|------|
| 1      | 21.03           | n.a.      | 64.158        | 28.490          | 50.06         | n.a.   | BMB* |
| 2      | 23.81           | n.a.      | 58.625        | 28.423          | 49.94         | n.a.   | BM * |
| Total: |                 |           | 122.783       | 56.912          | 100.00        | 0.000  |      |

b

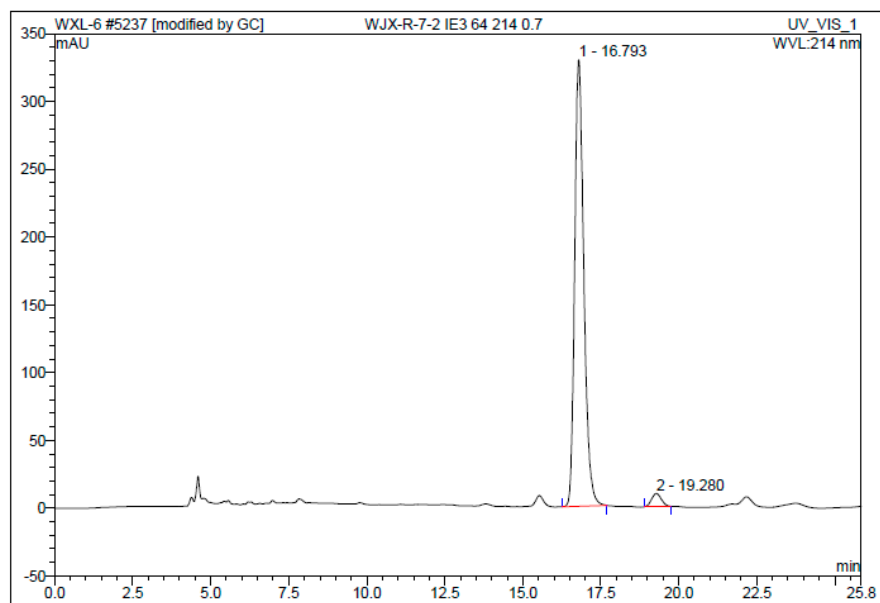

| No.    | Ret.Time<br>min | Peak Name | Height<br>mAU | Area<br>mAU*min | Rel.Area<br>% | Amount | Type |
|--------|-----------------|-----------|---------------|-----------------|---------------|--------|------|
| 1      | 16.79           | n.a.      | 329.385       | 111.937         | 97.03         | n.a.   | BMB* |
| 2      | 19.28           | n.a.      | 9.564         | 3.429           | 2.97          | n.a.   | BMB* |
| Total: |                 |           | 338.949       | 115.366         | 100.00        | 0.000  |      |

**Figure S101.** The HPLC data of **2m** in Scheme 1.

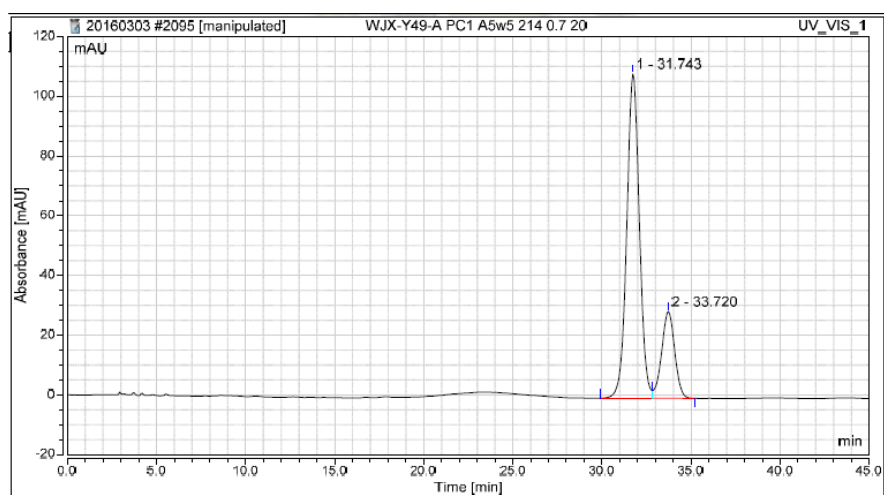

| Integration Results |                       |                       |                 |               |                    |
|---------------------|-----------------------|-----------------------|-----------------|---------------|--------------------|
| No.                 | Retention Time<br>min | Retention Time<br>min | Area<br>mAU*min | Height<br>mAU | Relative Area<br>% |
| 1                   | 32                    | 31.743                | 88.880          | 108.647       | 78.27              |
| 2                   | 34                    | 33.720                | 24.674          | 29.095        | 21.73              |
| Total:              |                       | 113.554               | 137.742         | 100.00        |                    |

**Figure S102.** The HPLC data of **1am** in Scheme 1.

a

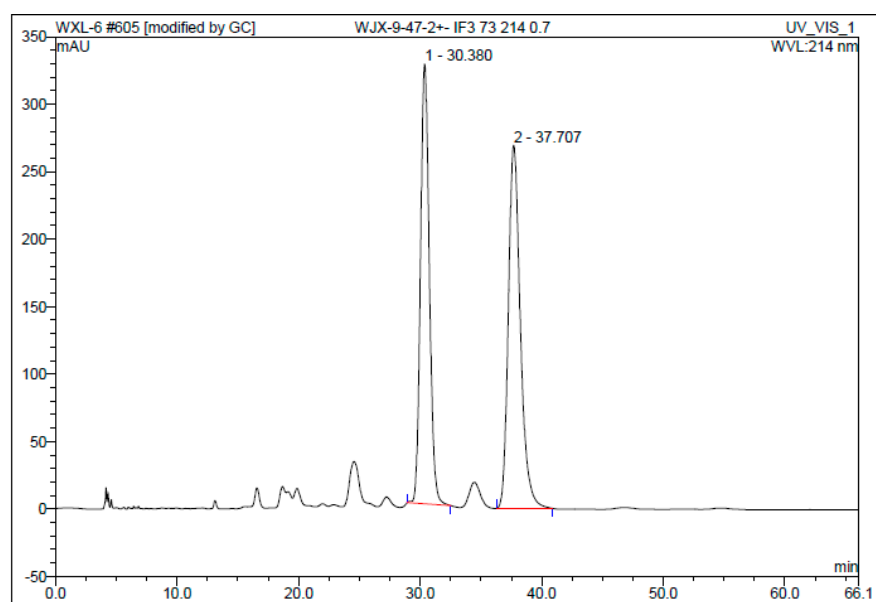

| No.    | Ret.Time<br>min | Peak Name | Height<br>mAU | Area<br>mAU*min | Rel.Area<br>% | Amount | Type |
|--------|-----------------|-----------|---------------|-----------------|---------------|--------|------|
| 1      | 30.38           | n.a.      | 325.972       | 275.270         | 47.24         | n.a.   | BMB* |
| 2      | 37.71           | n.a.      | 269.212       | 307.494         | 52.76         | n.a.   | BMB* |
| Total: |                 |           | 595.184       | 582.764         | 100.00        | 0.000  |      |

b

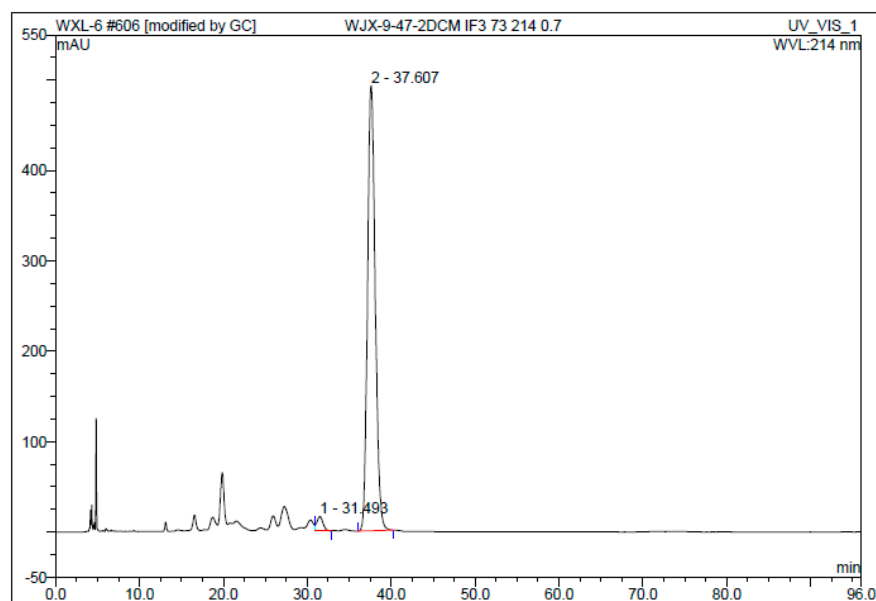

| No.    | Ret.Time<br>min | Peak Name | Height<br>mAU | Area<br>mAU*min | Rel.Area<br>% | Amount | Type |
|--------|-----------------|-----------|---------------|-----------------|---------------|--------|------|
| 1      | 31.49           | n.a.      | 15.529        | 13.612          | 2.53          | n.a.   | MB*  |
| 2      | 37.61           | n.a.      | 492.445       | 524.468         | 97.47         | n.a.   | BMB* |
| Total: |                 |           | 507.974       | 538.081         | 100.00        | 0.000  |      |

Figure S103. The HPLC data of **2n** in Scheme 1.

6. The HPLC Data of **1o-x** and **2o-x** in Scheme 2.

a

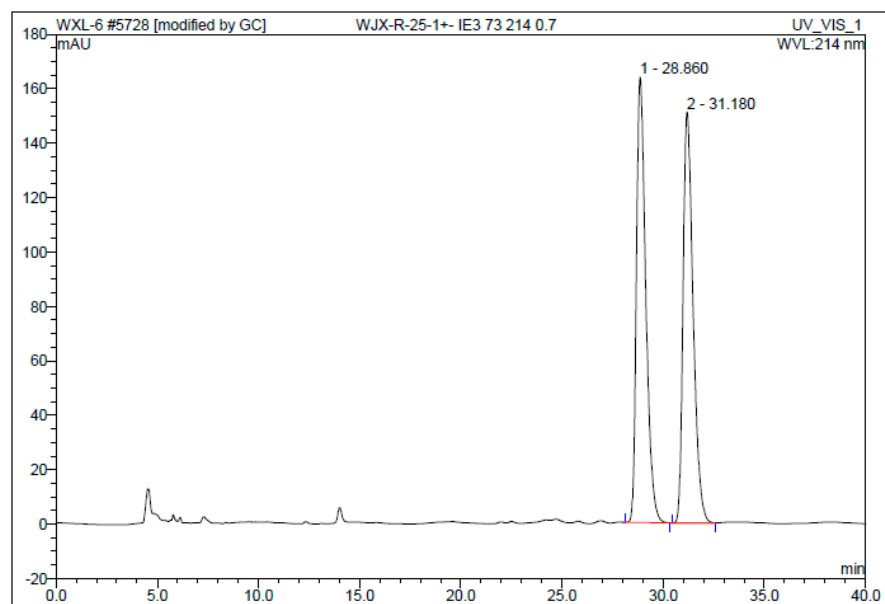

| No.    | Ret.Time<br>min | Peak Name | Height<br>mAU | Area<br>mAU*min | Rel.Area<br>% | Amount | Type |
|--------|-----------------|-----------|---------------|-----------------|---------------|--------|------|
| 1      | 28.86           | n.a.      | 163.779       | 87.964          | 50.29         | n.a.   | BMB  |
| 2      | 31.18           | n.a.      | 151.111       | 86.960          | 49.71         | n.a.   | BMB  |
| Total: |                 |           | 314.890       | 174.925         | 100.00        | 0.000  |      |

b

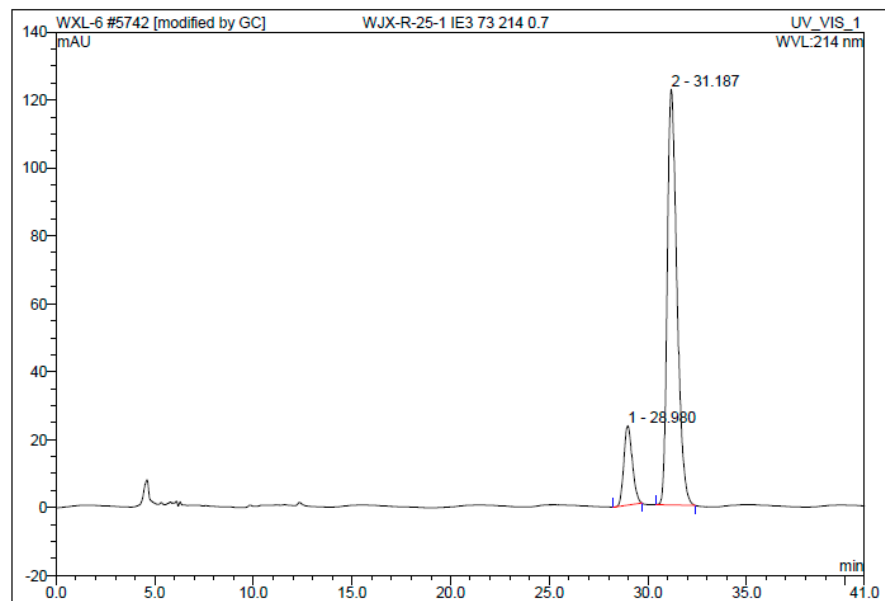

| No.    | Ret.Time<br>min | Peak Name | Height<br>mAU | Area<br>mAU*min | Rel.Area<br>% | Amount | Type |
|--------|-----------------|-----------|---------------|-----------------|---------------|--------|------|
| 1      | 28.98           | n.a.      | 23.381        | 11.660          | 14.31         | n.a.   | BMB* |
| 2      | 31.19           | n.a.      | 122.344       | 69.838          | 85.69         | n.a.   | BMB* |
| Total: |                 |           | 145.725       | 81.498          | 100.00        | 0.000  |      |

Figure S104. The HPLC data of **1o** in Scheme 2.



a

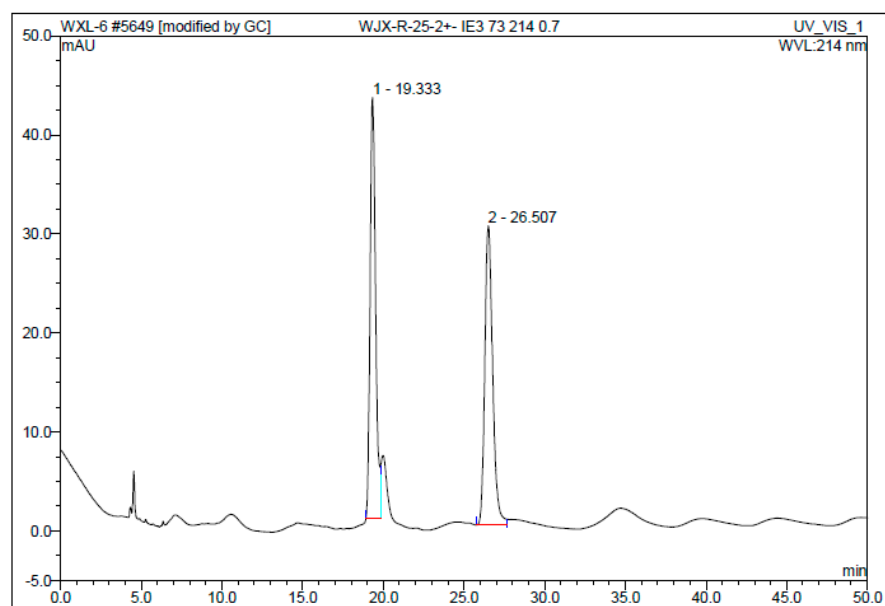

| No.           | Ret.Time<br>min | Peak Name | Height<br>mAU | Area<br>mAU*min | Rel.Area<br>% | Amount | Type |
|---------------|-----------------|-----------|---------------|-----------------|---------------|--------|------|
| 1             | 19.33           | n.a.      | 42.546        | 16.795          | 49.61         | n.a.   | BM * |
| 2             | 26.51           | n.a.      | 30.215        | 17.061          | 50.39         | n.a.   | BM * |
| <b>Total:</b> |                 |           | 72.761        | 33.855          | 100.00        | 0.000  |      |

b

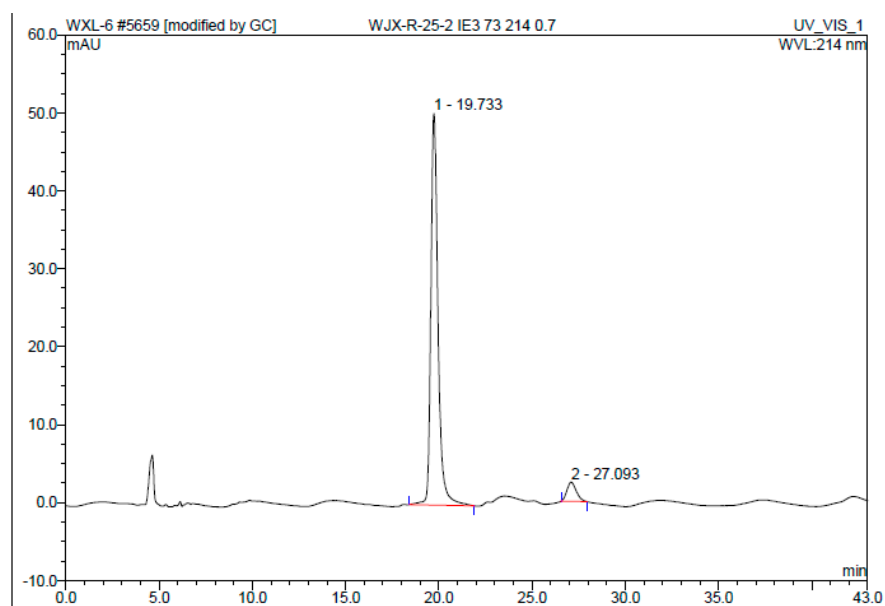

| No.           | Ret.Time<br>min | Peak Name | Height<br>mAU | Area<br>mAU*min | Rel.Area<br>% | Amount | Type |
|---------------|-----------------|-----------|---------------|-----------------|---------------|--------|------|
| 1             | 19.73           | n.a.      | 50.233        | 22.331          | 93.90         | n.a.   | BMB* |
| 2             | 27.09           | n.a.      | 2.477         | 1.450           | 6.10          | n.a.   | BMB* |
| <b>Total:</b> |                 |           | 52.710        | 23.781          | 100.00        | 0.000  |      |

Figure S105. The HPLC data of **2o** in Scheme 2.

a

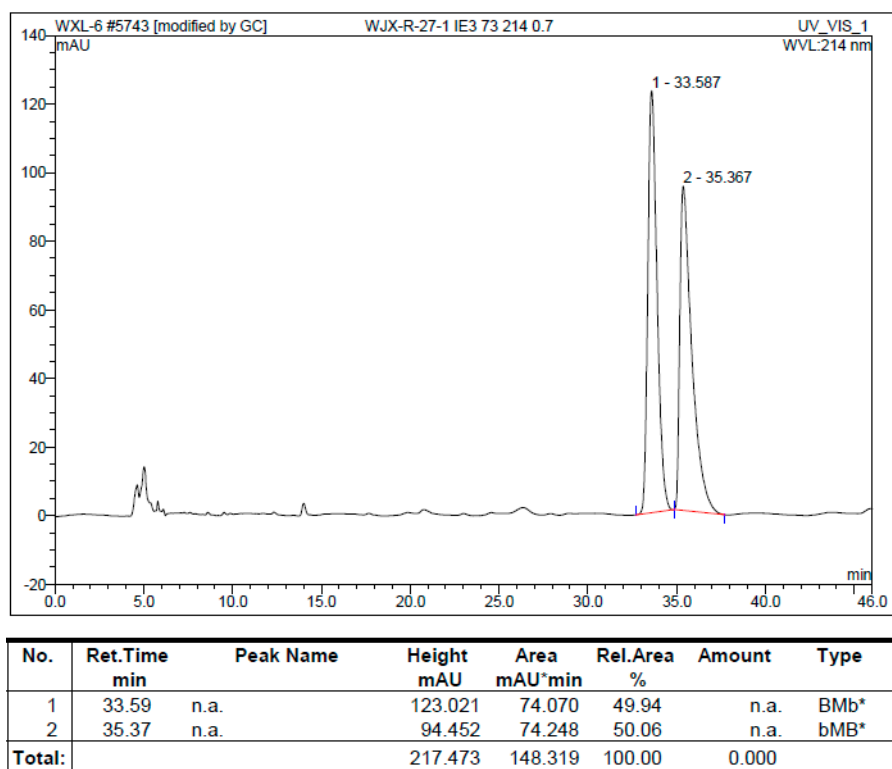

b

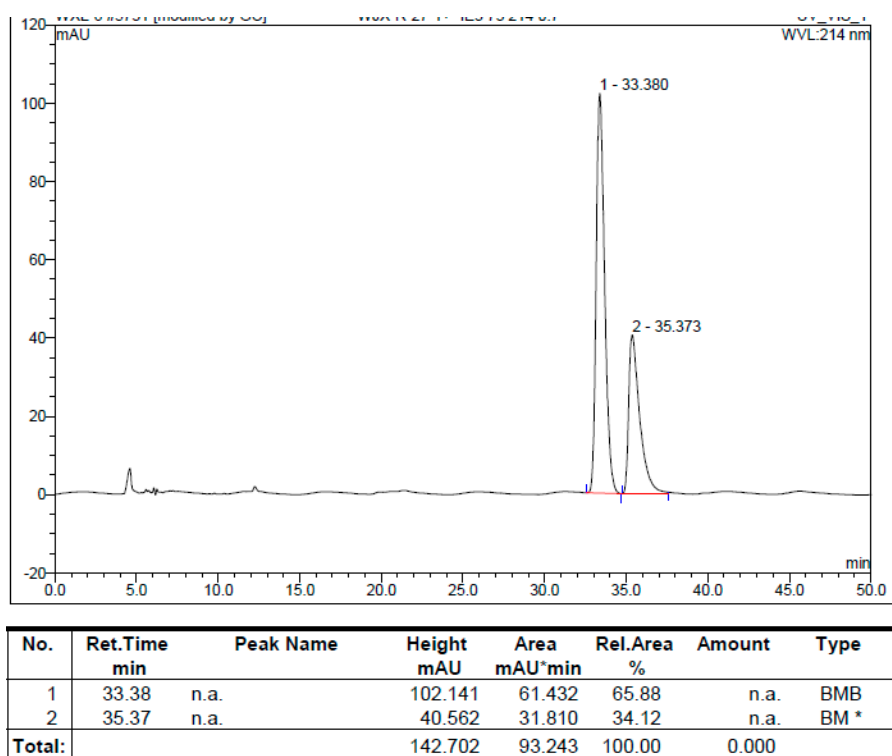

Figure S106. The HPLC data of **1p** in Scheme 2.

a

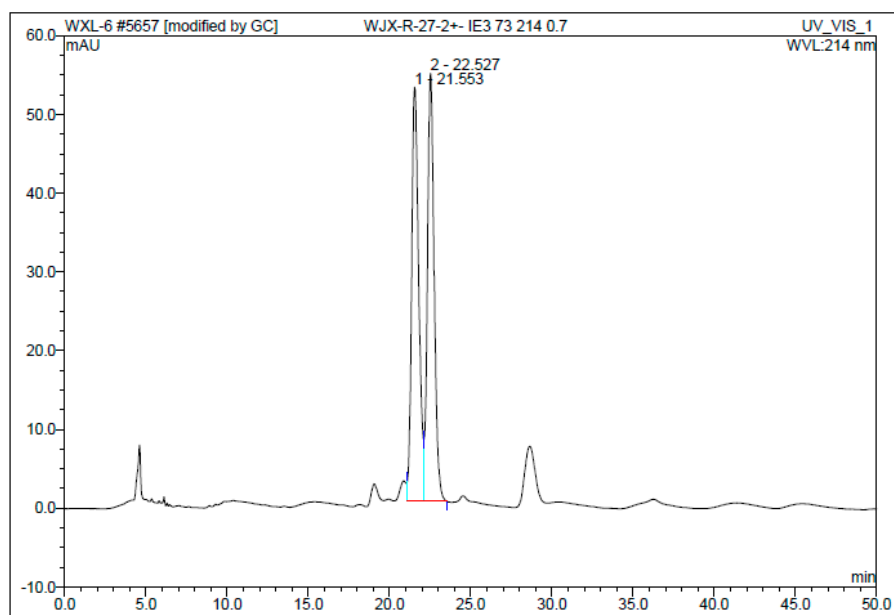

| No.    | Ret.Time<br>min | Peak Name | Height<br>mAU | Area<br>mAU*min | Rel.Area<br>% | Amount | Type |
|--------|-----------------|-----------|---------------|-----------------|---------------|--------|------|
| 1      | 21.55           | n.a.      | 52.571        | 26.529          | 50.32         | n.a.   | M *  |
| 2      | 22.53           | n.a.      | 54.338        | 26.193          | 49.68         | n.a.   | MB*  |
| Total: |                 |           | 106.909       | 52.722          | 100.00        | 0.000  |      |

b

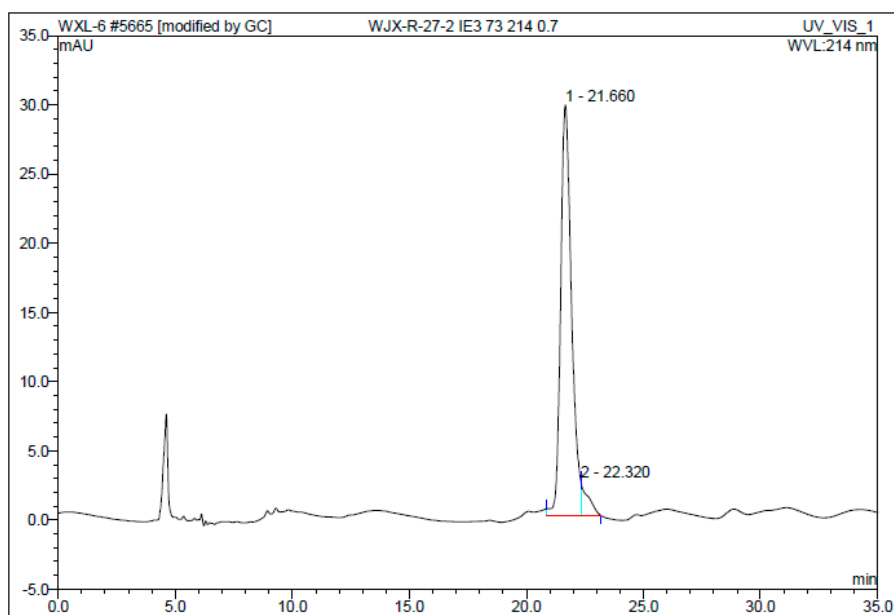

| No.    | Ret.Time<br>min | Peak Name | Height<br>mAU | Area<br>mAU*min | Rel.Area<br>% | Amount | Type |
|--------|-----------------|-----------|---------------|-----------------|---------------|--------|------|
| 1      | 21.66           | n.a.      | 29.663        | 15.813          | 94.76         | n.a.   | M *  |
| 2      | 22.32           | n.a.      | 2.515         | 0.874           | 5.24          | n.a.   | MB*  |
| Total: |                 |           | 32.178        | 16.687          | 100.00        | 0.000  |      |

Figure S107. The HPLC data of **2p** in Scheme 2.

a

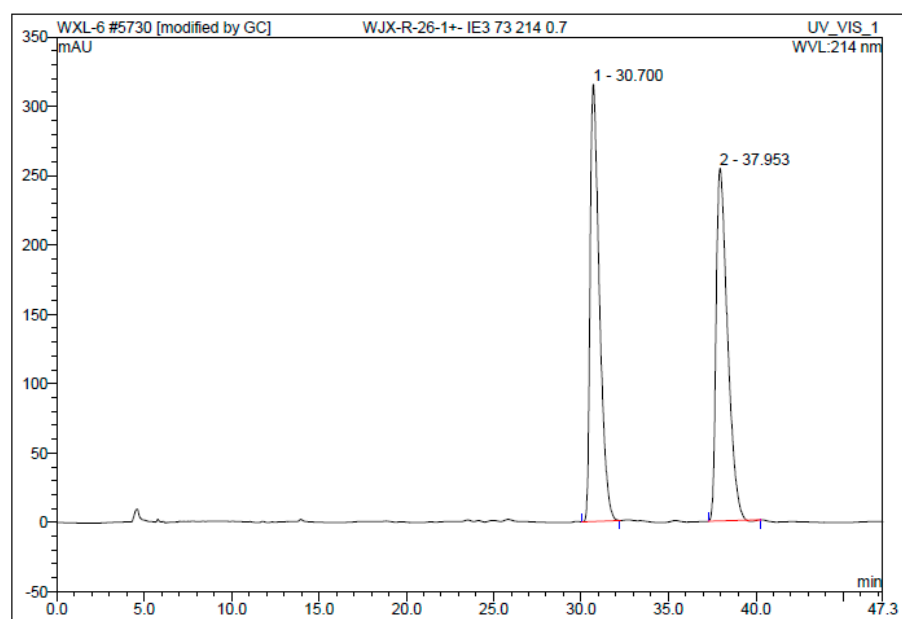

| No.           | Ret.Time<br>min | Peak Name | Height<br>mAU | Area<br>mAU*min | Rel.Area<br>% | Amount | Type |
|---------------|-----------------|-----------|---------------|-----------------|---------------|--------|------|
| 1             | 30.70           | n.a.      | 315.435       | 194.329         | 50.23         | n.a.   | BMB* |
| 2             | 37.95           | n.a.      | 254.445       | 192.566         | 49.77         | n.a.   | BMB* |
| <b>Total:</b> |                 |           | 569.880       | 386.894         | 100.00        | 0.000  |      |

b

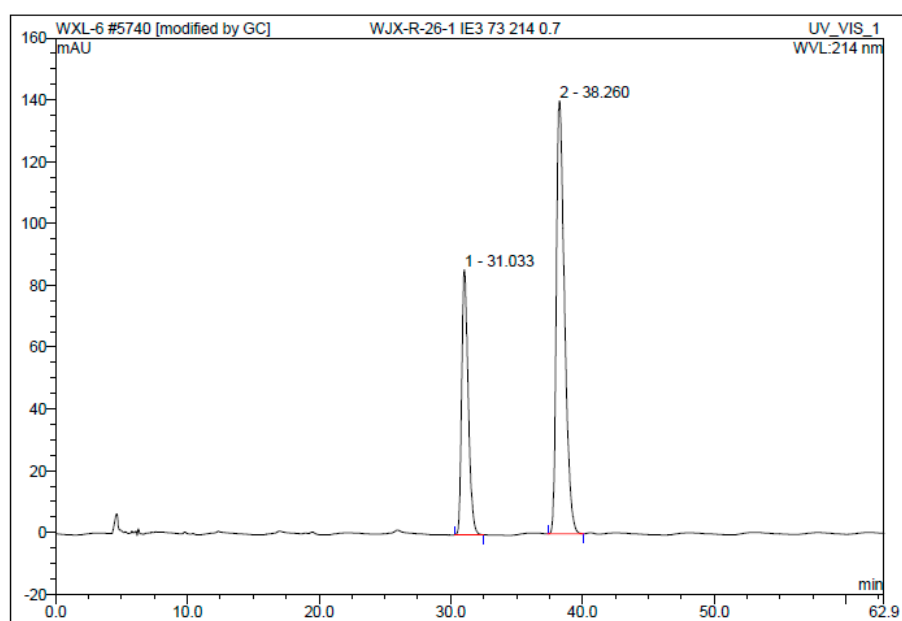

| No.           | Ret.Time<br>min | Peak Name | Height<br>mAU | Area<br>mAU*min | Rel.Area<br>% | Amount | Type |
|---------------|-----------------|-----------|---------------|-----------------|---------------|--------|------|
| 1             | 31.03           | n.a.      | 85.813        | 49.050          | 32.58         | n.a.   | BMB  |
| 2             | 38.26           | n.a.      | 140.193       | 101.491         | 67.42         | n.a.   | BMB  |
| <b>Total:</b> |                 |           | 226.007       | 150.540         | 100.00        | 0.000  |      |

Figure S108. The HPLC data of **1q** in Scheme 2.

a

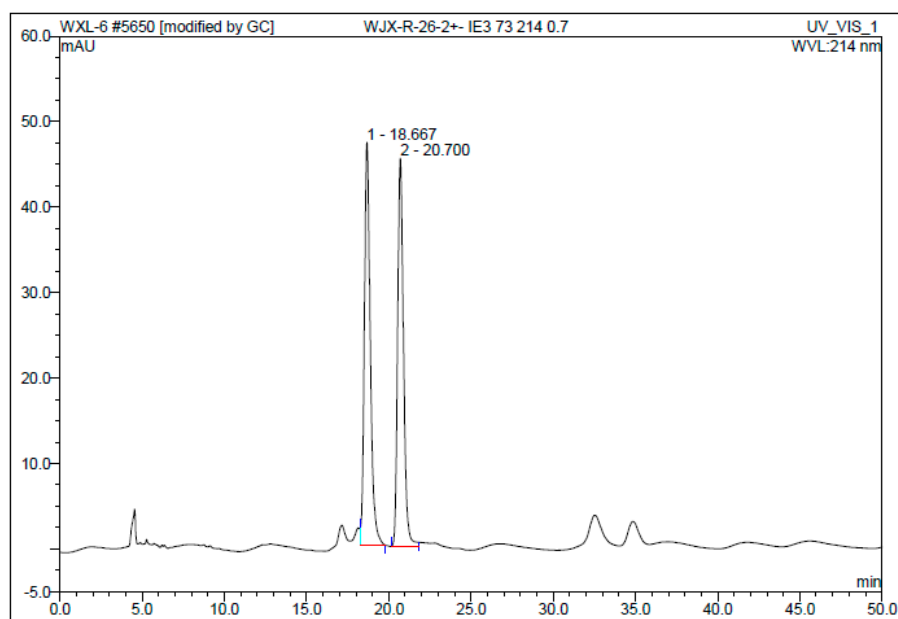

| No.    | Ret.Time<br>min | Peak Name | Height<br>mAU | Area<br>mAU*min | Rel.Area<br>% | Amount | Type |
|--------|-----------------|-----------|---------------|-----------------|---------------|--------|------|
| 1      | 18.67           | n.a.      | 47.138        | 19.796          | 51.27         | n.a.   | MB*  |
| 2      | 20.70           | n.a.      | 45.426        | 18.812          | 48.73         | n.a.   | BM * |
| Total: |                 |           | 92.564        | 38.608          | 100.00        | 0.000  |      |

b

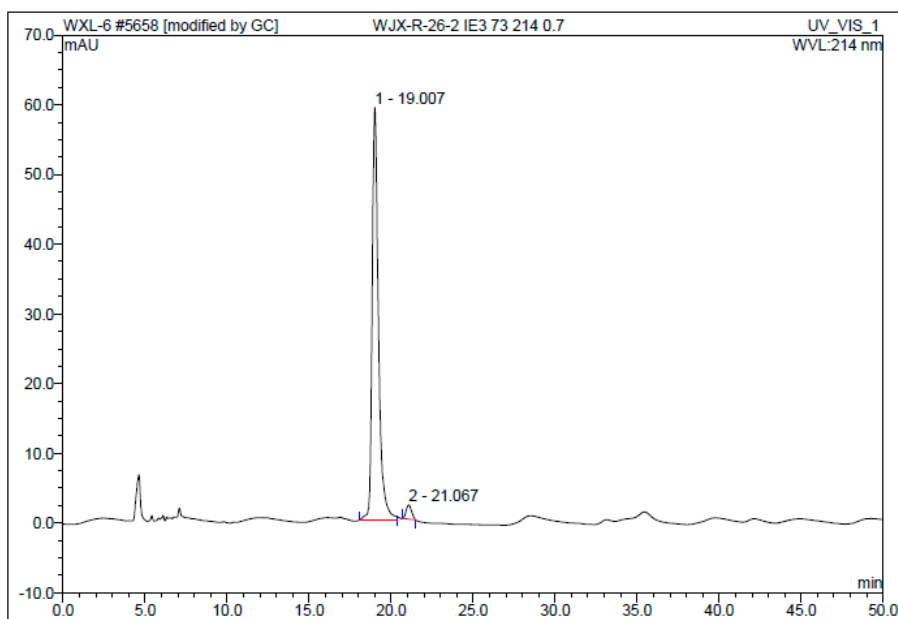

| No.    | Ret.Time<br>min | Peak Name | Height<br>mAU | Area<br>mAU*min | Rel.Area<br>% | Amount | Type |
|--------|-----------------|-----------|---------------|-----------------|---------------|--------|------|
| 1      | 19.01           | n.a.      | 59.220        | 26.439          | 97.16         | n.a.   | BM * |
| 2      | 21.07           | n.a.      | 2.037         | 0.773           | 2.84          | n.a.   | BMB* |
| Total: |                 |           | 61.257        | 27.212          | 100.00        | 0.000  |      |

Figure S109. The HPLC data of **2q** in Scheme 2.

a

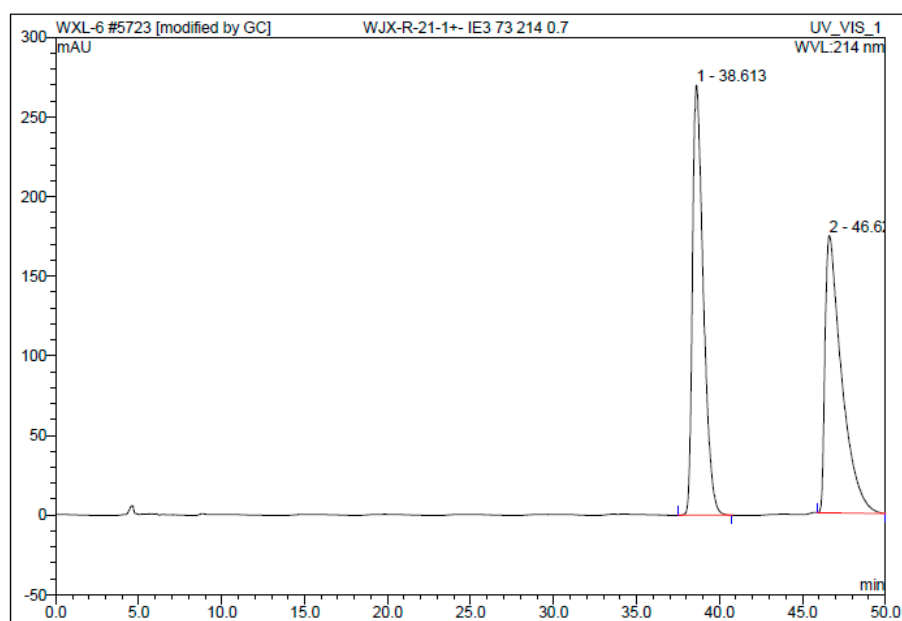

| No.    | Ret.Time<br>min | Peak Name | Height<br>mAU | Area<br>mAU*min | Rel.Area<br>% | Amount | Type |
|--------|-----------------|-----------|---------------|-----------------|---------------|--------|------|
| 1      | 38.61           | n.a.      | 270.072       | 206.010         | 50.44         | n.a.   | BMB  |
| 2      | 46.63           | n.a.      | 173.979       | 202.446         | 49.56         | n.a.   | BMB  |
| Total: |                 |           | 444.052       | 408.456         | 100.00        | 0.000  |      |

b

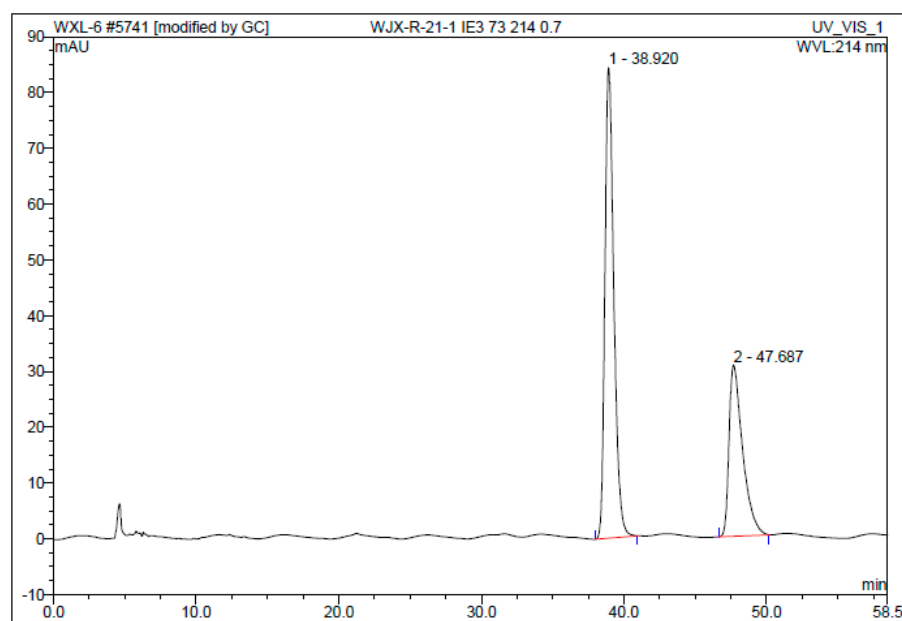

| No.    | Ret.Time<br>min | Peak Name | Height<br>mAU | Area<br>mAU*min | Rel.Area<br>% | Amount | Type |
|--------|-----------------|-----------|---------------|-----------------|---------------|--------|------|
| 1      | 38.92           | n.a.      | 84.369        | 61.380          | 64.47         | n.a.   | BMB  |
| 2      | 47.69           | n.a.      | 30.701        | 33.828          | 35.53         | n.a.   | BMB  |
| Total: |                 |           | 115.070       | 95.208          | 100.00        | 0.000  |      |

Figure S110. The HPLC data of **1r** in Scheme 2.

a

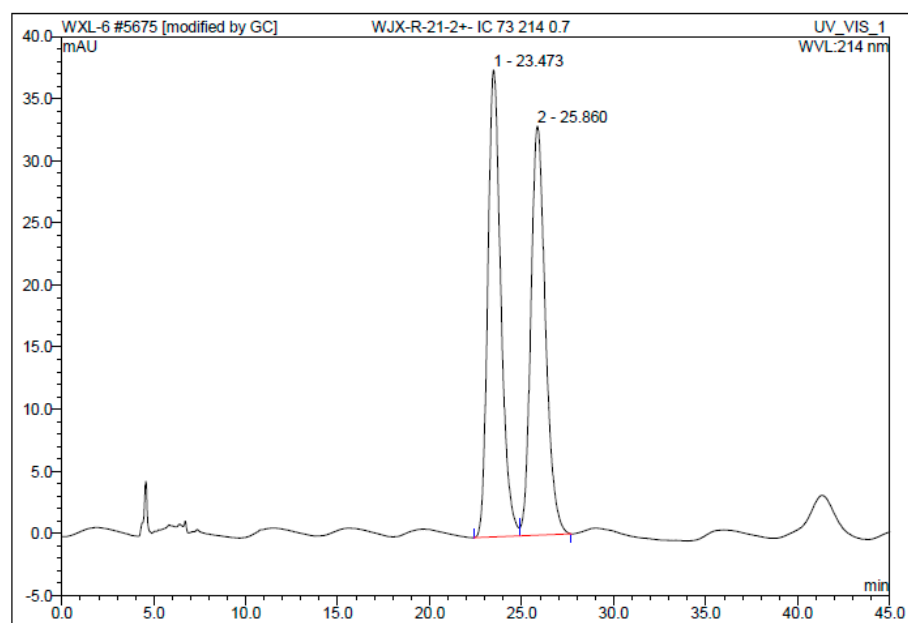

| No.    | Ret.Time<br>min | Peak Name | Height<br>mAU | Area<br>mAU*min | Rel.Area<br>% | Amount | Type |
|--------|-----------------|-----------|---------------|-----------------|---------------|--------|------|
| 1      | 23.47           | n.a.      | 37.587        | 31.001          | 50.58         | n.a.   | BM   |
| 2      | 25.86           | n.a.      | 32.936        | 30.292          | 49.42         | n.a.   | MB   |
| Total: |                 |           | 70.523        | 61.294          | 100.00        | 0.000  |      |

b

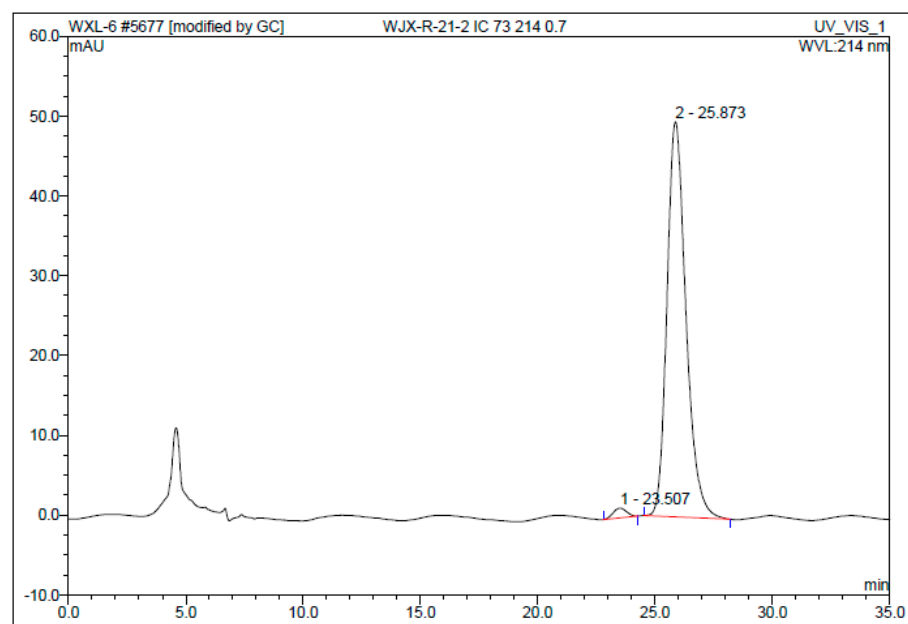

| No.    | Ret.Time<br>min | Peak Name | Height<br>mAU | Area<br>mAU*min | Rel.Area<br>% | Amount | Type |
|--------|-----------------|-----------|---------------|-----------------|---------------|--------|------|
| 1      | 23.51           | n.a.      | 1.225         | 0.802           | 1.70          | n.a.   | BMB  |
| 2      | 25.87           | n.a.      | 49.517        | 46.435          | 98.30         | n.a.   | BMB  |
| Total: |                 |           | 50.742        | 47.238          | 100.00        | 0.000  |      |

Figure S111. The HPLC data of **2r** in Scheme 2.

a

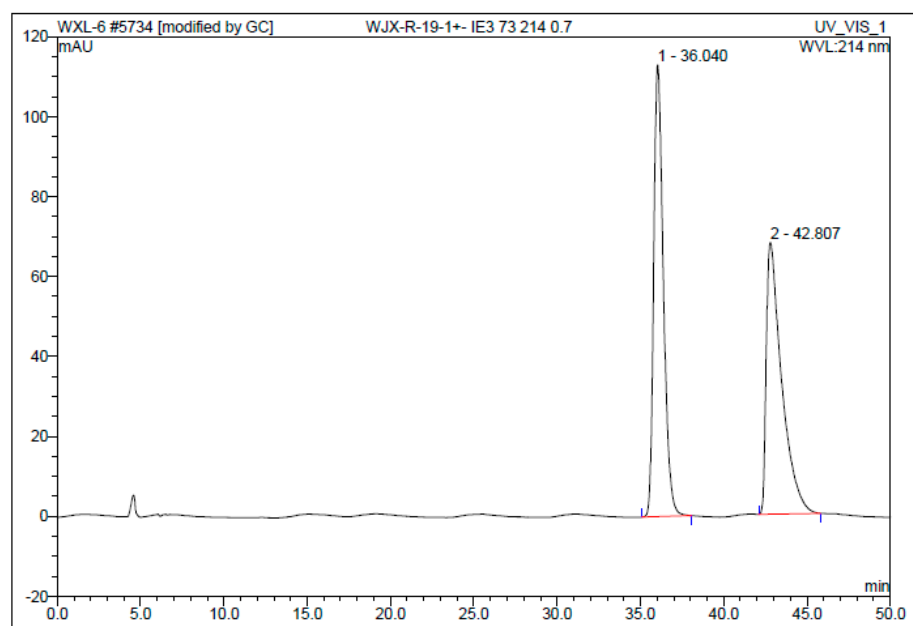

| No.    | Ret.Time<br>min | Peak Name | Height<br>mAU | Area<br>mAU*min | Rel.Area<br>% | Amount | Type |
|--------|-----------------|-----------|---------------|-----------------|---------------|--------|------|
| 1      | 36.04           | n.a.      | 113.024       | 76.115          | 51.10         | n.a.   | BMB  |
| 2      | 42.81           | n.a.      | 67.961        | 72.844          | 48.90         | n.a.   | BMB  |
| Total: |                 |           | 180.985       | 148.959         | 100.00        | 0.000  |      |

b

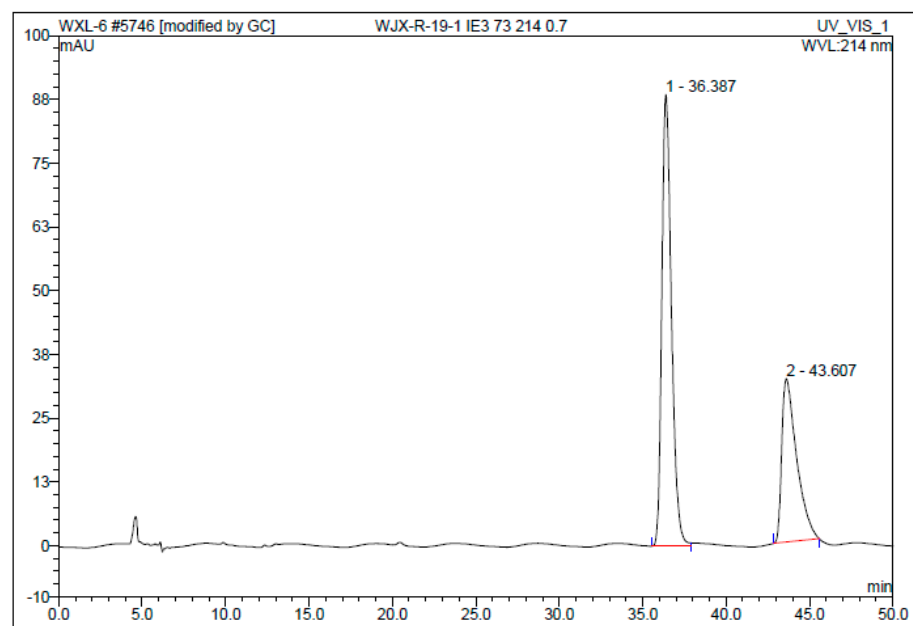

| No.    | Ret.Time<br>min | Peak Name | Height<br>mAU | Area<br>mAU*min | Rel.Area<br>% | Amount | Type |
|--------|-----------------|-----------|---------------|-----------------|---------------|--------|------|
| 1      | 36.39           | n.a.      | 88.542        | 59.336          | 64.22         | n.a.   | BM * |
| 2      | 43.61           | n.a.      | 32.028        | 33.058          | 35.78         | n.a.   | BMB* |
| Total: |                 |           | 120.570       | 92.394          | 100.00        | 0.000  |      |

Figure S112. The HPLC data of **1s** in Scheme 2.



a

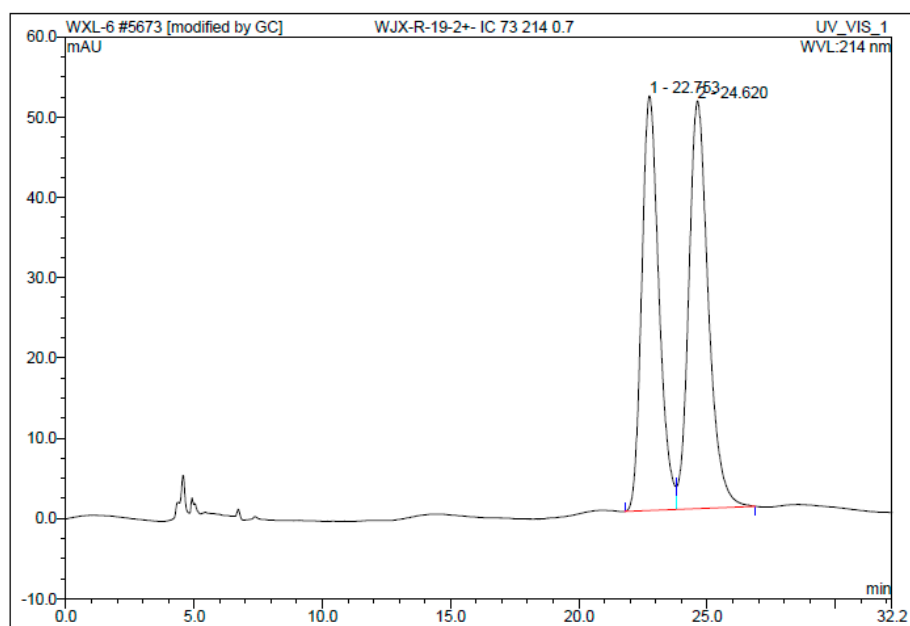

| No.    | Ret.Time<br>min | Peak Name | Height<br>mAU | Area<br>mAU*min | Rel.Area<br>% | Amount | Type |
|--------|-----------------|-----------|---------------|-----------------|---------------|--------|------|
| 1      | 22.75           | n.a.      | 51.685        | 40.111          | 47.10         | n.a.   | BM   |
| 2      | 24.62           | n.a.      | 50.813        | 45.048          | 52.90         | n.a.   | MB   |
| Total: |                 |           | 102.498       | 85.159          | 100.00        | 0.000  |      |

b

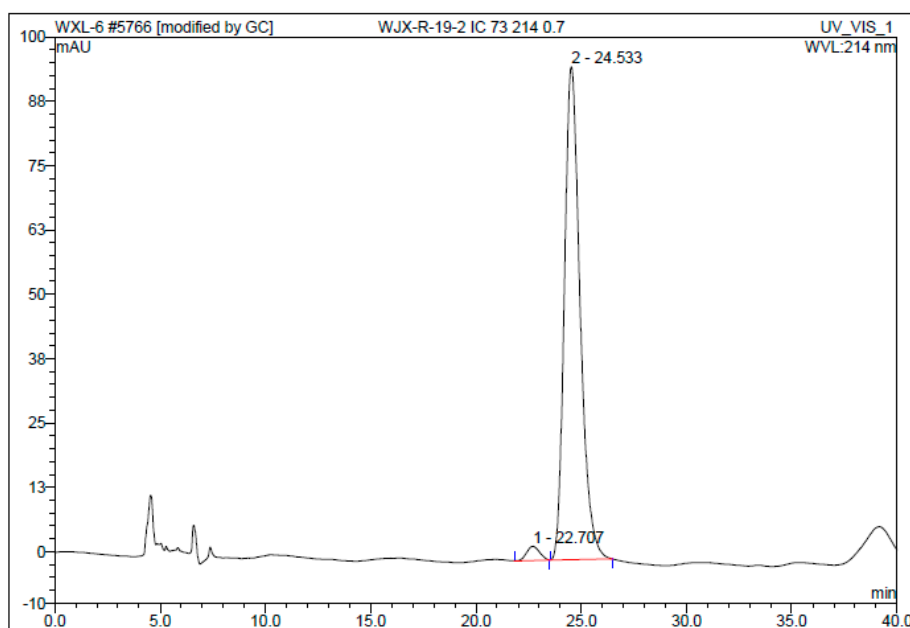

| No.    | Ret.Time<br>min | Peak Name | Height<br>mAU | Area<br>mAU*min | Rel.Area<br>% | Amount | Type |
|--------|-----------------|-----------|---------------|-----------------|---------------|--------|------|
| 1      | 22.71           | n.a.      | 2.760         | 1.969           | 2.33          | n.a.   | BMB* |
| 2      | 24.53           | n.a.      | 95.755        | 82.712          | 97.67         | n.a.   | BMB* |
| Total: |                 |           | 98.514        | 84.680          | 100.00        | 0.000  |      |

Figure S113. The HPLC data of **2s** in Scheme 2.

a

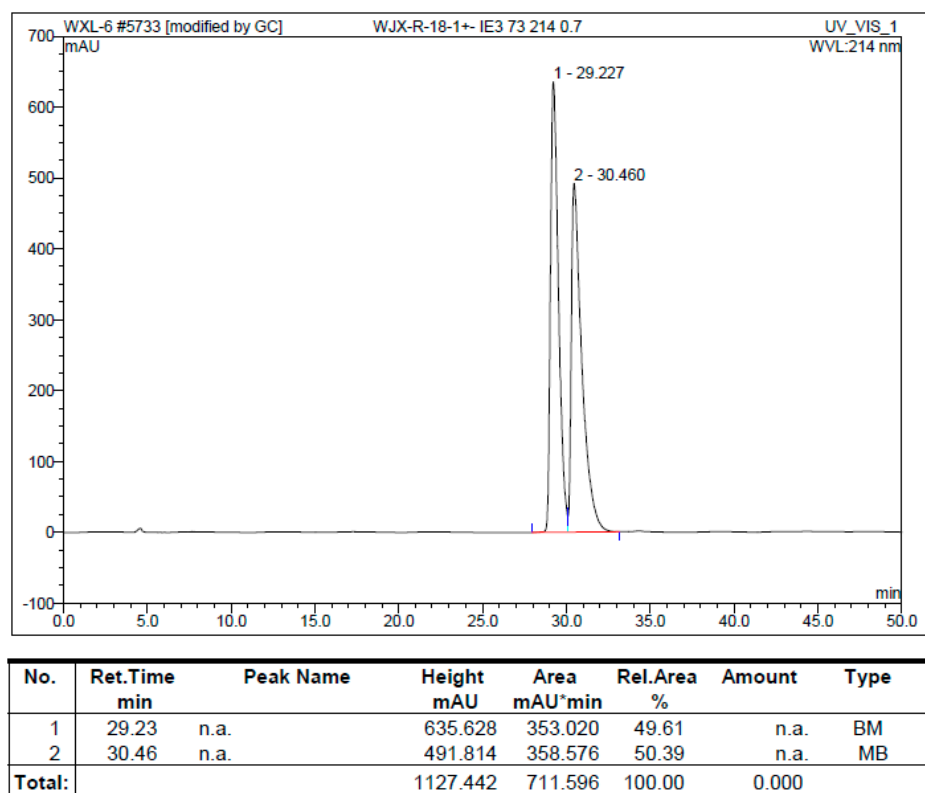

b

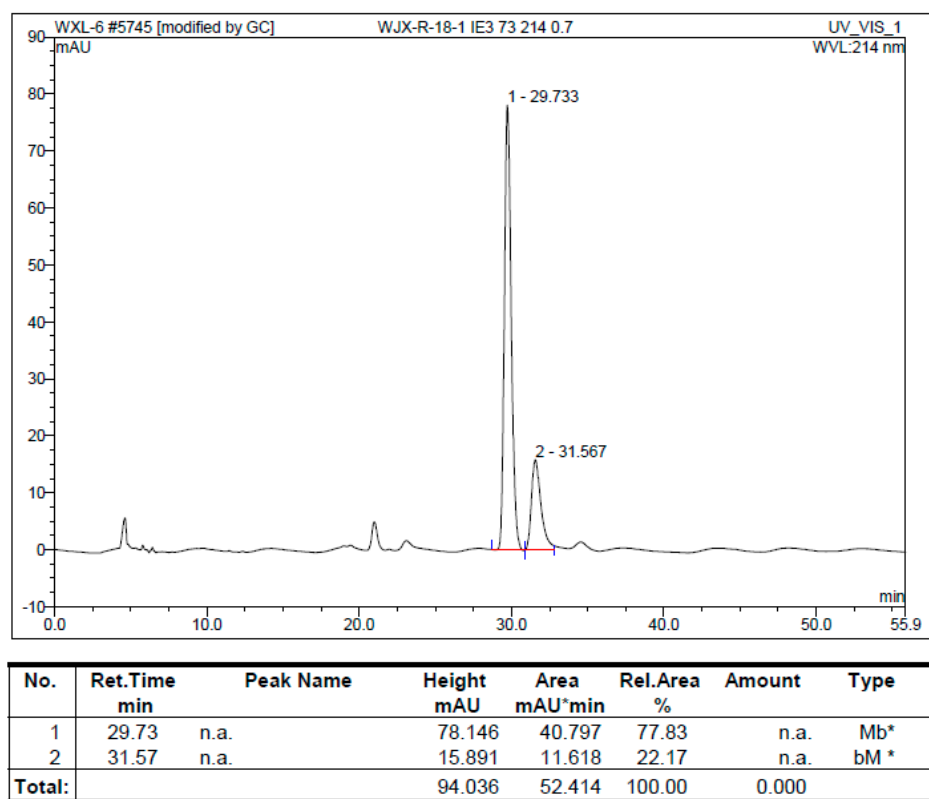

Figure S114. The HPLC data of **1t** in Scheme 2.

a

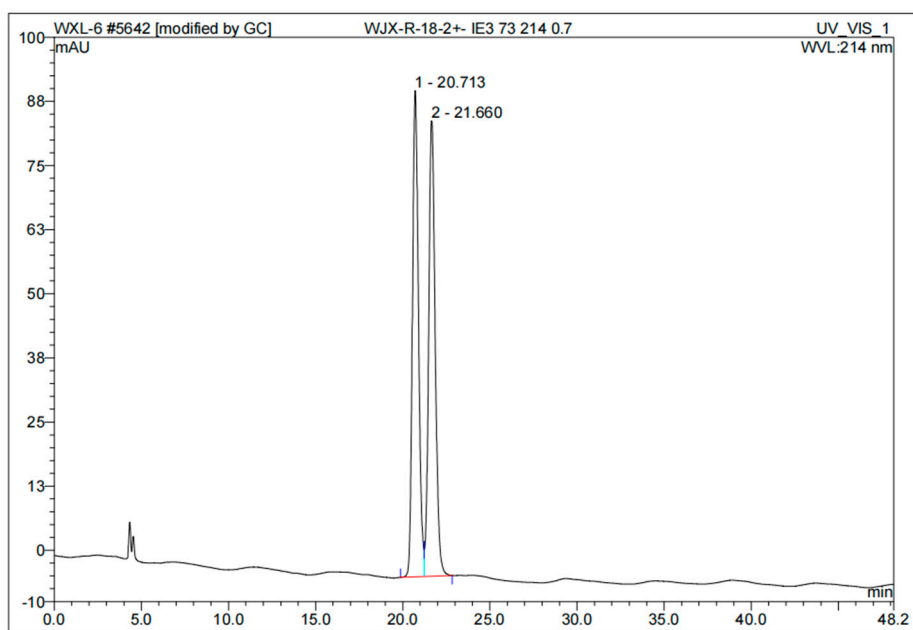

| No.    | Ret.Time<br>min | Peak Name | Height<br>mAU | Area<br>mAU*min | Rel.Area<br>% | Amount | Type |
|--------|-----------------|-----------|---------------|-----------------|---------------|--------|------|
| 1      | 20.71           | n.a.      | 94.790        | 38.067          | 49.71         | n.a.   | BM   |
| 2      | 21.66           | n.a.      | 88.790        | 38.510          | 50.29         | n.a.   | MB   |
| Total: |                 |           | 183.580       | 76.576          | 100.00        | 0.000  |      |

b

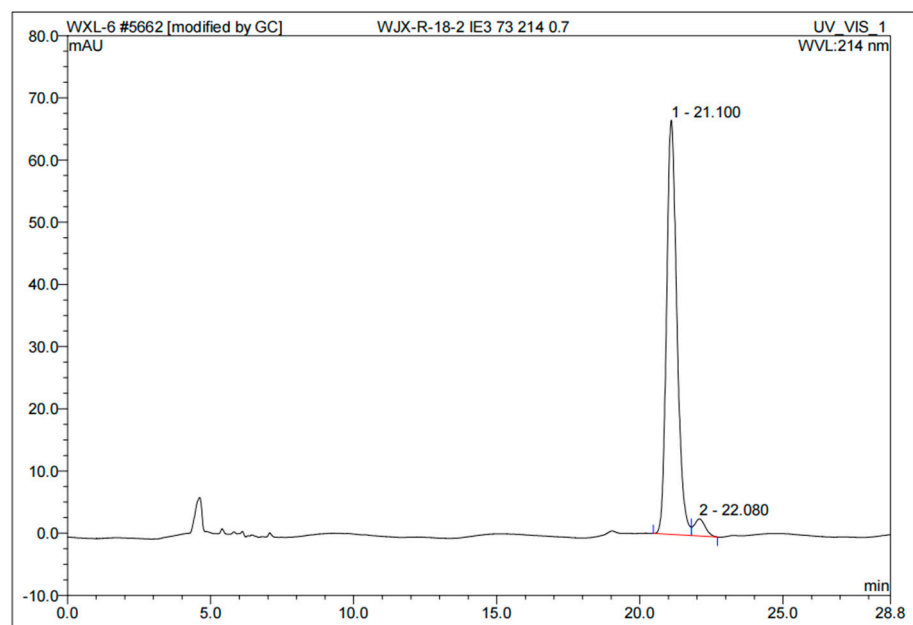

| No.    | Ret.Time<br>min | Peak Name | Height<br>mAU | Area<br>mAU*min | Rel.Area<br>% | Amount | Type |
|--------|-----------------|-----------|---------------|-----------------|---------------|--------|------|
| 1      | 21.10           | n.a.      | 66.633        | 27.982          | 95.77         | n.a.   | BM   |
| 2      | 22.08           | n.a.      | 2.746         | 1.236           | 4.23          | n.a.   | MB   |
| Total: |                 |           | 69.379        | 29.218          | 100.00        | 0.000  |      |

Figure S115. The HPLC data of **2t** in Scheme 2.

a

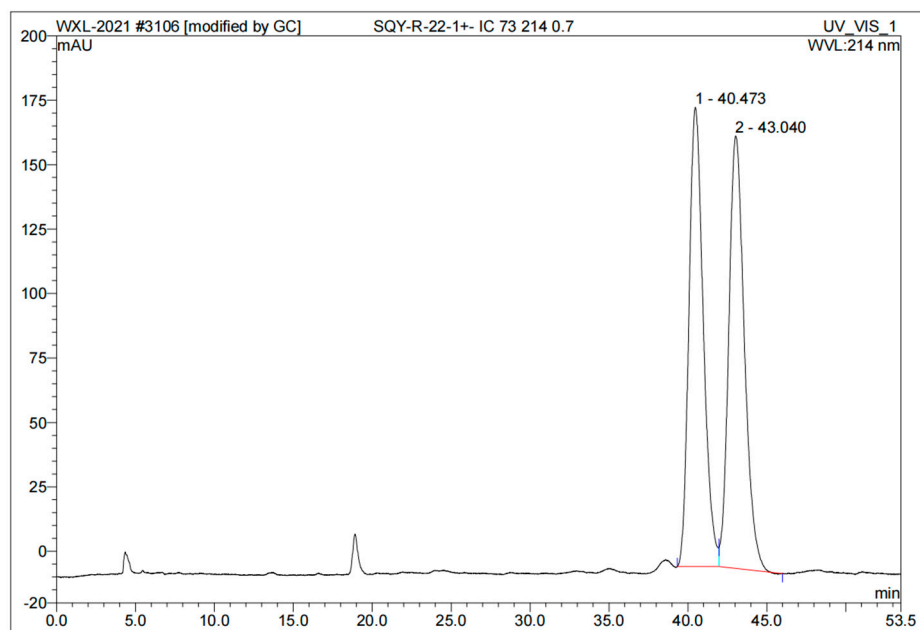

| No.    | Ret.Time<br>min | Peak Name | Height<br>mAU | Area<br>mAU*min | Rel.Area<br>% | Amount | Type |
|--------|-----------------|-----------|---------------|-----------------|---------------|--------|------|
| 1      | 40.47           | n.a.      | 178.262       | 188.165         | 49.45         | n.a.   | BM * |
| 2      | 43.04           | n.a.      | 167.891       | 192.340         | 50.55         | n.a.   | MB*  |
| Total: |                 |           | 346.153       | 380.505         | 100.00        | 0.000  |      |

b

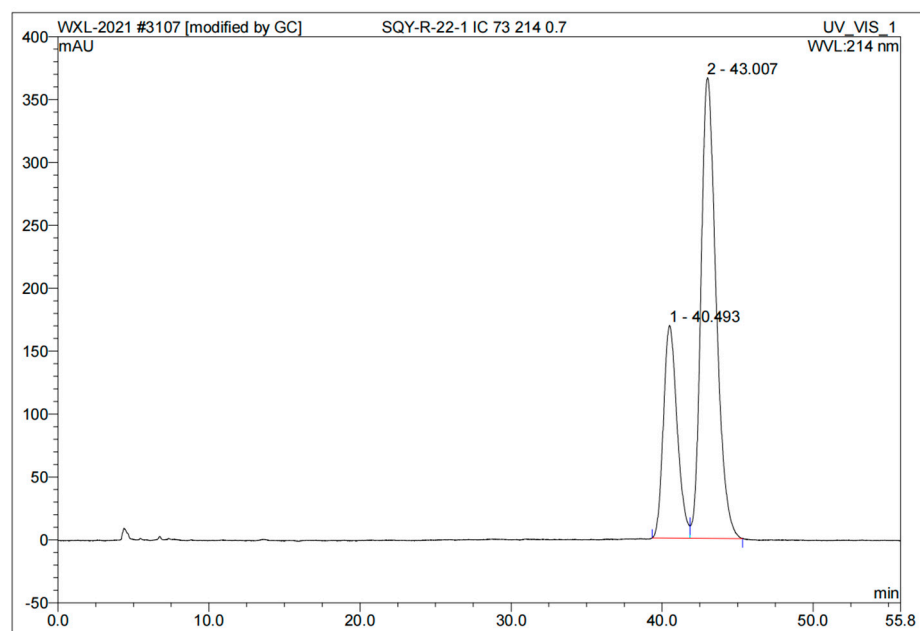

| No.    | Ret.Time<br>min | Peak Name | Height<br>mAU | Area<br>mAU*min | Rel.Area<br>% | Amount | Type |
|--------|-----------------|-----------|---------------|-----------------|---------------|--------|------|
| 1      | 40.49           | n.a.      | 169.153       | 177.644         | 29.33         | n.a.   | BM   |
| 2      | 43.01           | n.a.      | 366.302       | 427.950         | 70.67         | n.a.   | MB   |
| Total: |                 |           | 535.455       | 605.594         | 100.00        | 0.000  |      |

Figure S116. The HPLC data of **1u** in Scheme 2.

a

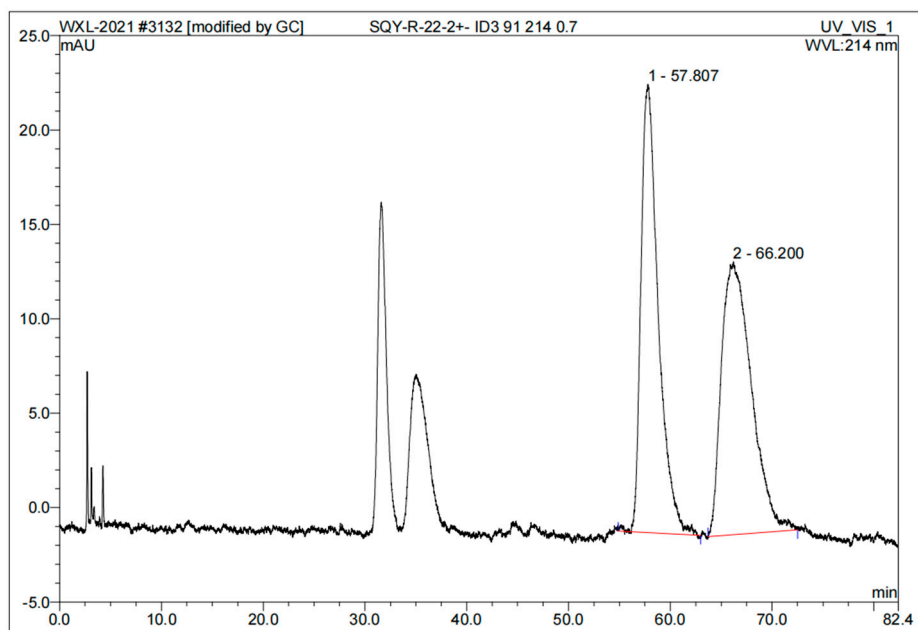

| No.    | Ret.Time<br>min | Peak Name | Height<br>mAU | Area<br>mAU*min | Rel.Area<br>% | Amount | Type |
|--------|-----------------|-----------|---------------|-----------------|---------------|--------|------|
| 1      | 57.81           | n.a.      | 23.736        | 46.860          | 48.73         | n.a.   | BMB* |
| 2      | 66.20           | n.a.      | 14.469        | 49.299          | 51.27         | n.a.   | BMB* |
| Total: |                 |           | 38.205        | 96.160          | 100.00        | 0.000  |      |

b

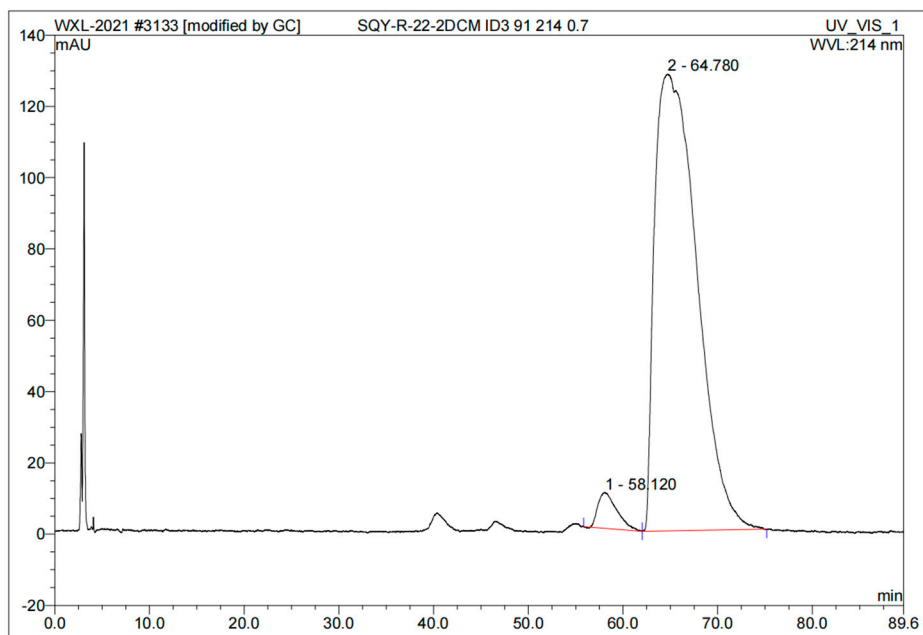

| No.    | Ret.Time<br>min | Peak Name | Height<br>mAU | Area<br>mAU*min | Rel.Area<br>% | Amount | Type |
|--------|-----------------|-----------|---------------|-----------------|---------------|--------|------|
| 1      | 58.12           | n.a.      | 10.069        | 23.204          | 3.39          | n.a.   | BMB* |
| 2      | 64.78           | n.a.      | 128.193       | 661.629         | 96.61         | n.a.   | bMB* |
| Total: |                 |           | 138.262       | 684.833         | 100.00        | 0.000  |      |

Figure S117. The HPLC data of **2u** in Scheme 2.

a

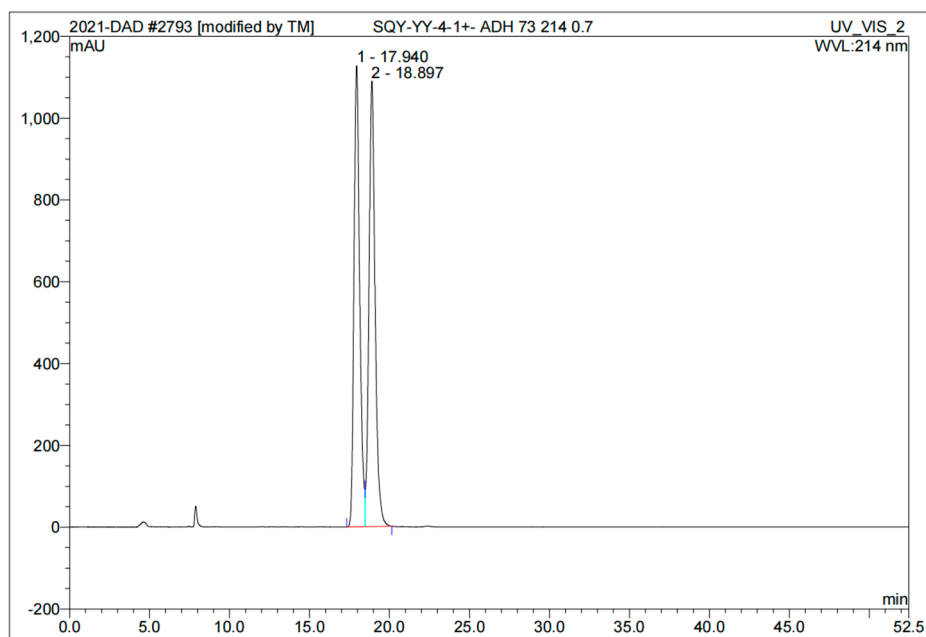

| No.    | Ret.Time<br>min | Peak Name | Height<br>mAU | Area<br>mAU*min | Rel.Area<br>% | Amount | Type |
|--------|-----------------|-----------|---------------|-----------------|---------------|--------|------|
| 1      | 17.94           | n.a.      | 1127.317      | 466.937         | 48.98         | n.a.   | BM   |
| 2      | 18.90           | n.a.      | 1089.283      | 486.368         | 51.02         | n.a.   | MB   |
| Total: |                 |           | 2216.600      | 953.304         | 100.00        | 0.000  |      |

b

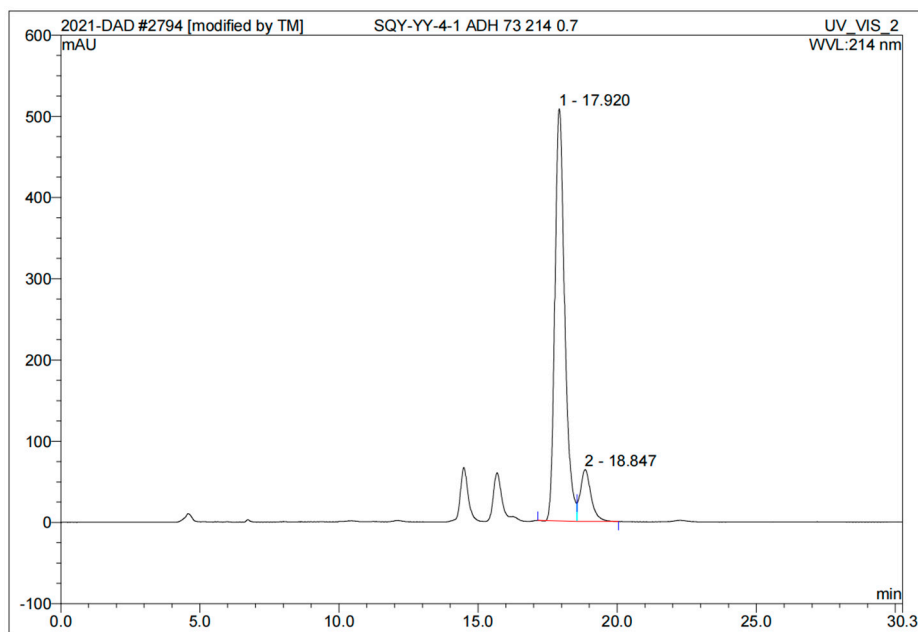

| No.    | Ret.Time<br>min | Peak Name | Height<br>mAU | Area<br>mAU*min | Rel.Area<br>% | Amount | Type |
|--------|-----------------|-----------|---------------|-----------------|---------------|--------|------|
| 1      | 17.92           | n.a.      | 507.757       | 207.452         | 87.80         | n.a.   | BM * |
| 2      | 18.85           | n.a.      | 64.114        | 28.813          | 12.20         | n.a.   | MB*  |
| Total: |                 |           | 571.871       | 236.265         | 100.00        | 0.000  |      |

Figure S118. The HPLC data of **1v** in Scheme 2.

a

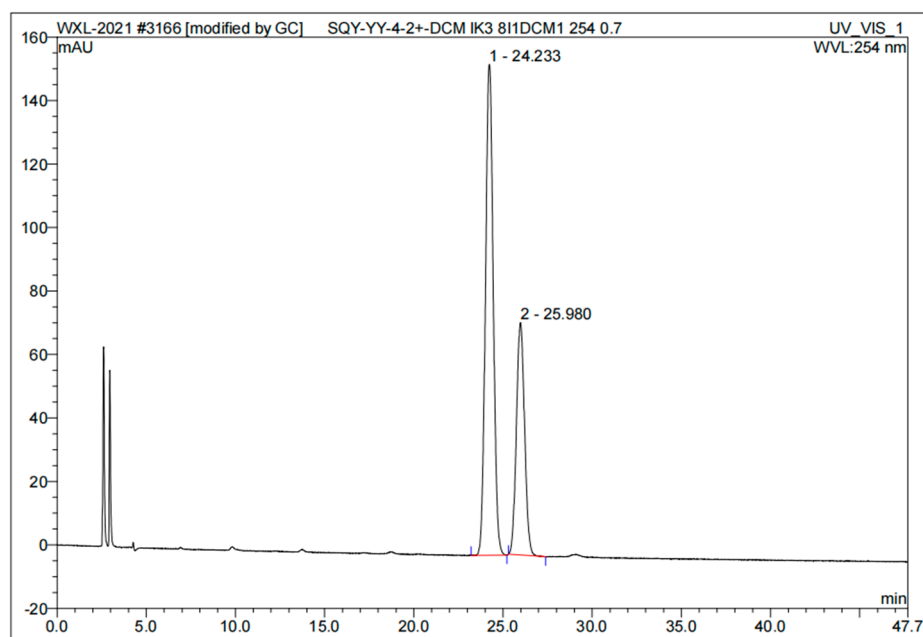

| No.    | Ret.Time<br>min | Peak Name | Height<br>mAU | Area<br>mAU*min | Rel.Area<br>% | Amount | Type |
|--------|-----------------|-----------|---------------|-----------------|---------------|--------|------|
| 1      | 24.23           | n.a.      | 154.699       | 77.890          | 66.66         | n.a.   | BMB* |
| 2      | 25.98           | n.a.      | 73.227        | 38.963          | 33.34         | n.a.   | BMB* |
| Total: |                 |           | 227.926       | 116.853         | 100.00        | 0.000  |      |

b

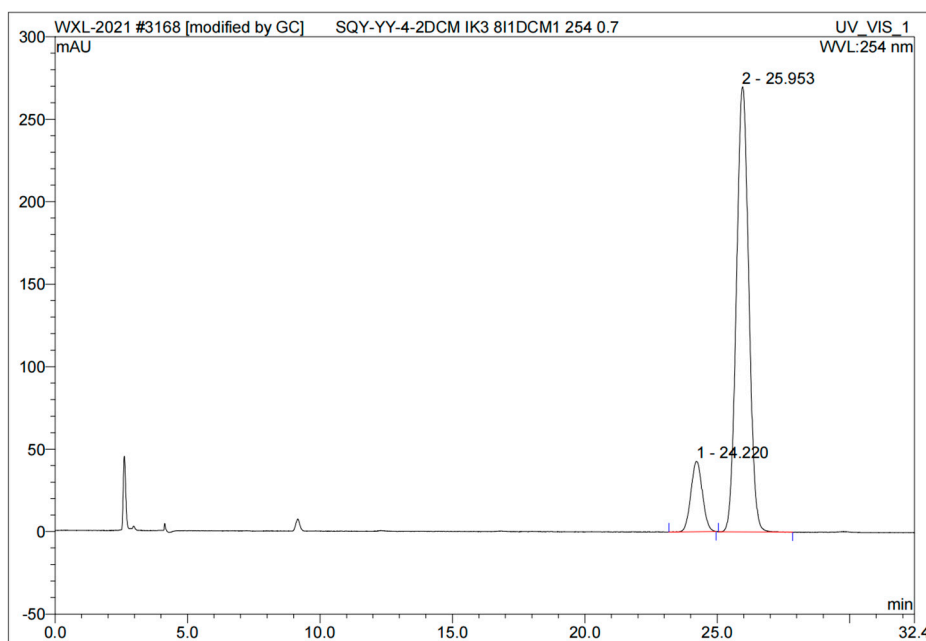

| No.    | Ret.Time<br>min | Peak Name | Height<br>mAU | Area<br>mAU*min | Rel.Area<br>% | Amount | Type |
|--------|-----------------|-----------|---------------|-----------------|---------------|--------|------|
| 1      | 24.22           | n.a.      | 42.802        | 21.470          | 12.82         | n.a.   | BMB* |
| 2      | 25.95           | n.a.      | 269.892       | 146.018         | 87.18         | n.a.   | BMB* |
| Total: |                 |           | 312.694       | 167.488         | 100.00        | 0.000  |      |

Figure S119. The HPLC data of **2v** in Scheme 2.

a

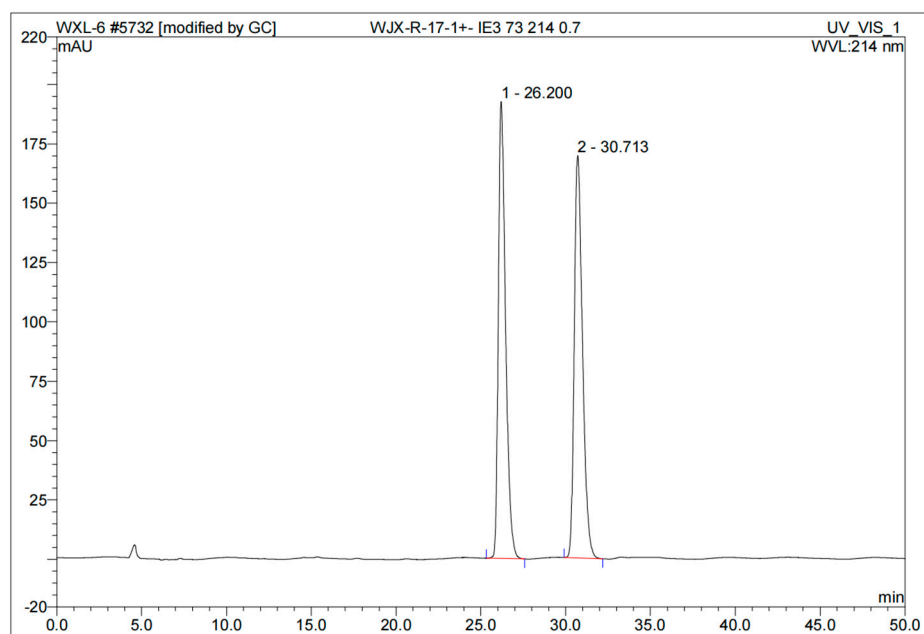

| No.    | Ret.Time<br>min | Peak Name | Height<br>mAU | Area<br>mAU*min | Rel.Area<br>% | Amount | Type |
|--------|-----------------|-----------|---------------|-----------------|---------------|--------|------|
| 1      | 26.20           | n.a.      | 192.547       | 95.390          | 50.01         | n.a.   | BMB  |
| 2      | 30.71           | n.a.      | 169.622       | 95.350          | 49.99         | n.a.   | BMB  |
| Total: |                 |           | 362.169       | 190.739         | 100.00        | 0.000  |      |

b

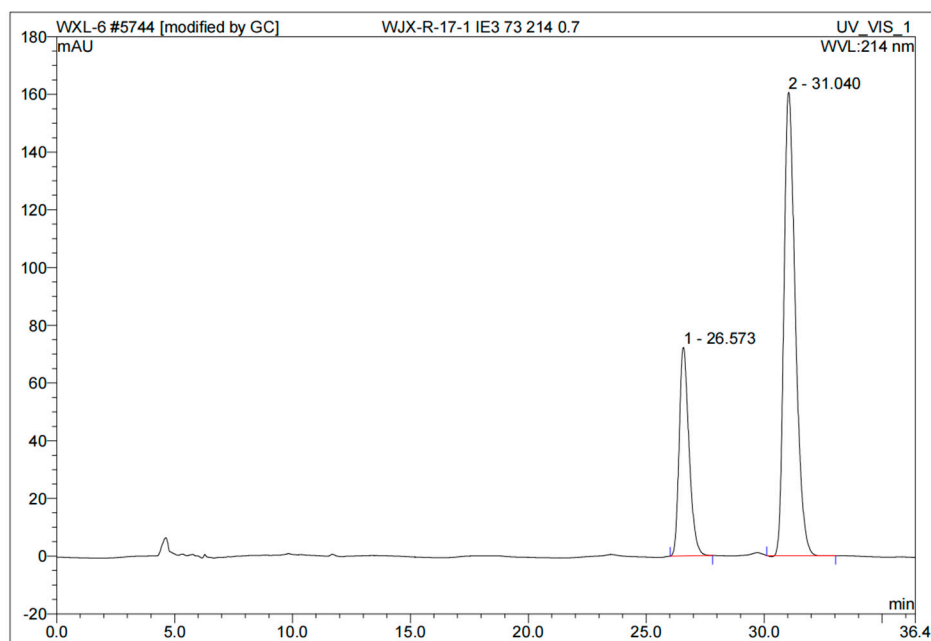

| No.    | Ret.Time<br>min | Peak Name | Height<br>mAU | Area<br>mAU*min | Rel.Area<br>% | Amount | Type |
|--------|-----------------|-----------|---------------|-----------------|---------------|--------|------|
| 1      | 26.57           | n.a.      | 72.262        | 34.965          | 27.91         | n.a.   | BMB* |
| 2      | 31.04           | n.a.      | 160.638       | 90.296          | 72.09         | n.a.   | BMB* |
| Total: |                 |           | 232.900       | 125.261         | 100.00        | 0.000  |      |

Figure S120. The HPLC data of **1w** in Scheme 2.



a

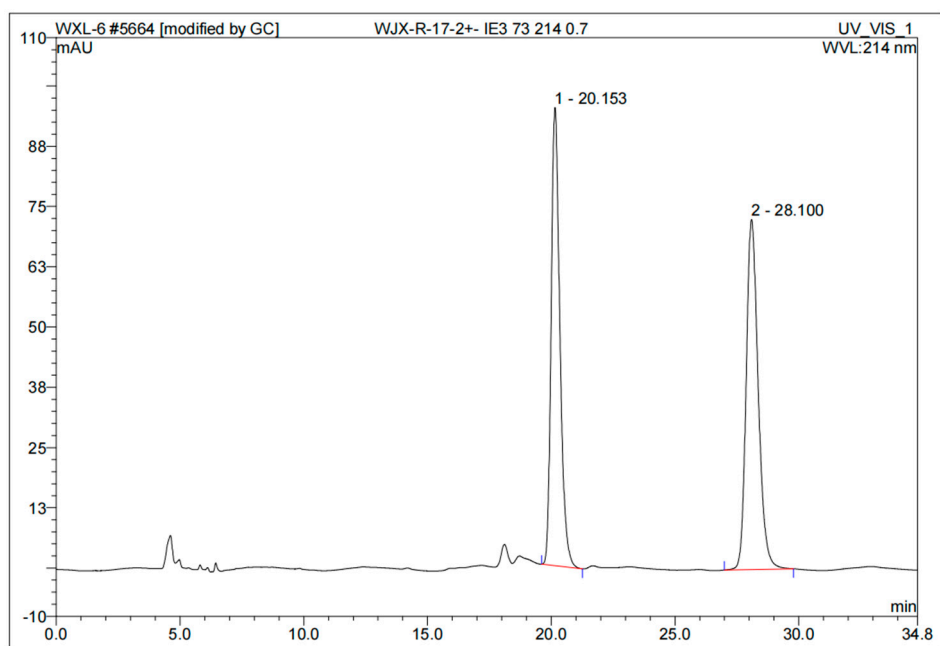

| No.    | Ret.Time<br>min | Peak Name | Height<br>mAU | Area<br>mAU*min | Rel.Area<br>% | Amount | Type |
|--------|-----------------|-----------|---------------|-----------------|---------------|--------|------|
| 1      | 20.15           | n.a.      | 95.080        | 38.738          | 48.64         | n.a.   | BMB* |
| 2      | 28.10           | n.a.      | 72.649        | 40.899          | 51.36         | n.a.   | BMB  |
| Total: |                 |           | 167.729       | 79.637          | 100.00        | 0.000  |      |

b

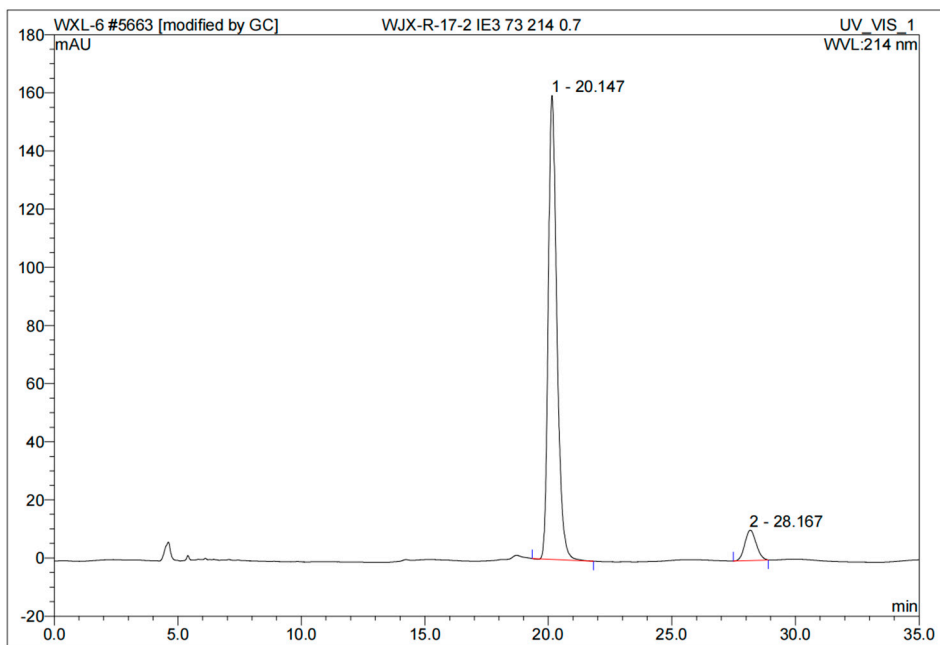

| No.    | Ret.Time<br>min | Peak Name | Height<br>mAU | Area<br>mAU*min | Rel.Area<br>% | Amount | Type |
|--------|-----------------|-----------|---------------|-----------------|---------------|--------|------|
| 1      | 20.15           | n.a.      | 159.625       | 64.527          | 92.09         | n.a.   | BMB* |
| 2      | 28.17           | n.a.      | 10.411        | 5.542           | 7.91          | n.a.   | BMB* |
| Total: |                 |           | 170.036       | 70.069          | 100.00        | 0.000  |      |

Figure S121. The HPLC data of **2w** in Scheme 2.

a

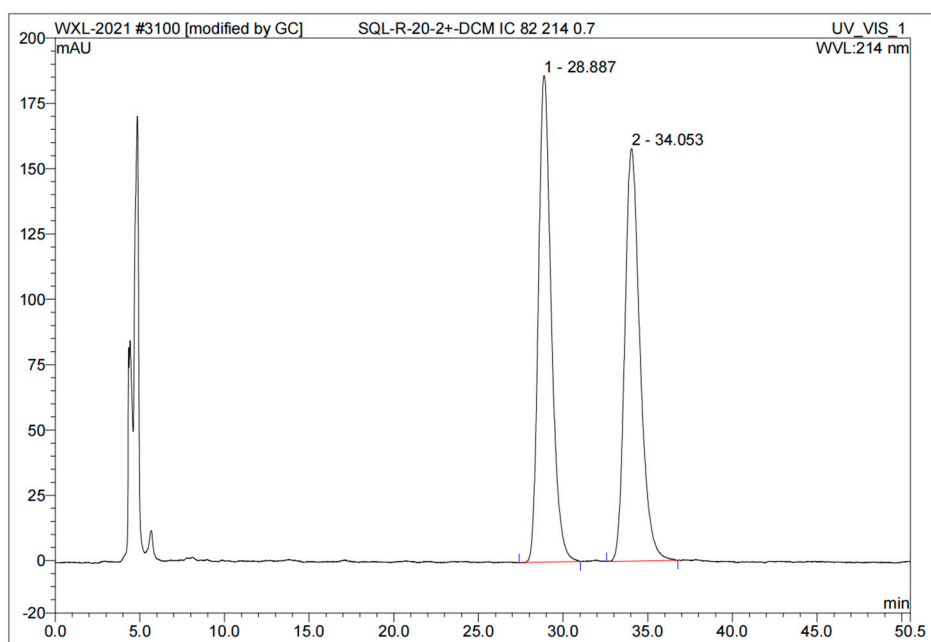

| No.    | Ret.Time<br>min | Peak Name | Height<br>mAU | Area<br>mAU*min | Rel.Area<br>% | Amount | Type |
|--------|-----------------|-----------|---------------|-----------------|---------------|--------|------|
| 1      | 28.89           | n.a.      | 186.293       | 164.003         | 49.96         | n.a.   | BMB* |
| 2      | 34.05           | n.a.      | 157.927       | 164.269         | 50.04         | n.a.   | BMB* |
| Total: |                 |           | 344.220       | 328.272         | 100.00        | 0.000  |      |

b

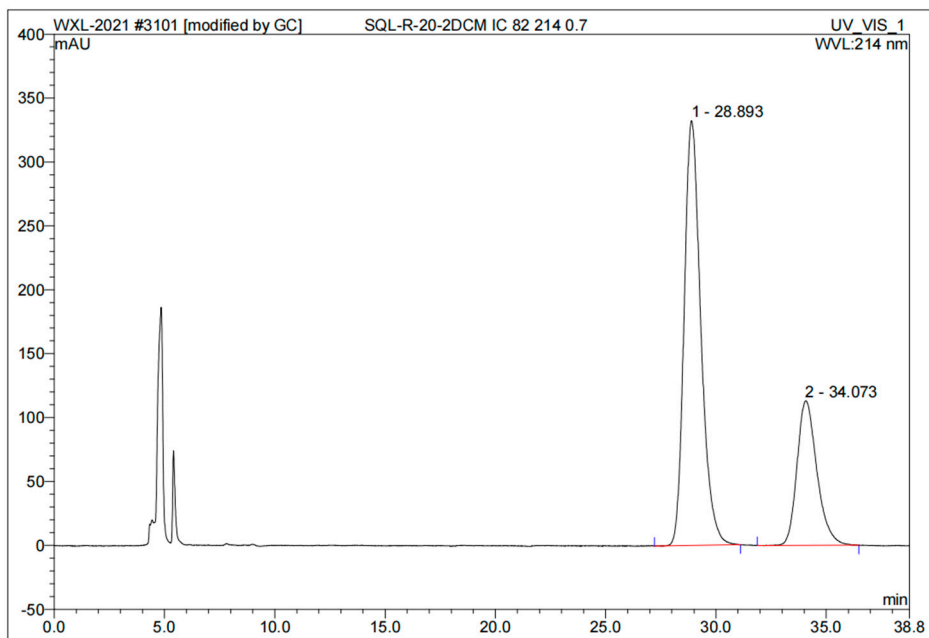

| No.    | Ret.Time<br>min | Peak Name | Height<br>mAU | Area<br>mAU*min | Rel.Area<br>% | Amount | Type |
|--------|-----------------|-----------|---------------|-----------------|---------------|--------|------|
| 1      | 28.89           | n.a.      | 332.585       | 291.835         | 71.08         | n.a.   | BMB* |
| 2      | 34.07           | n.a.      | 113.273       | 118.741         | 28.92         | n.a.   | BMB* |
| Total: |                 |           | 445.859       | 410.576         | 100.00        | 0.000  |      |

Figure S122. The HPLC data of **1x** in Scheme 2.

a

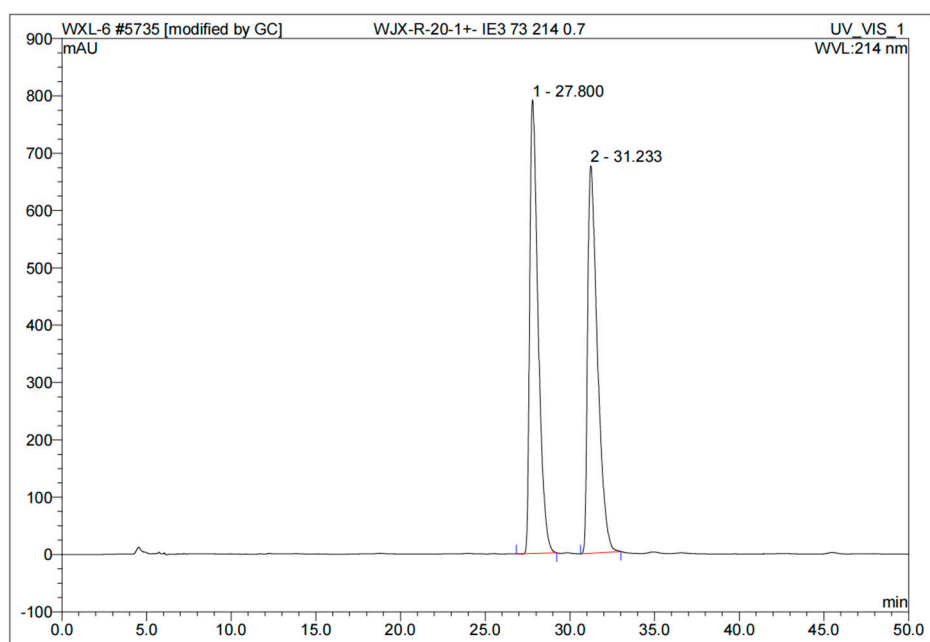

| No.    | Ret.Time<br>min | Peak Name | Height<br>mAU | Area<br>mAU*min | Rel.Area<br>% | Amount | Type |
|--------|-----------------|-----------|---------------|-----------------|---------------|--------|------|
| 1      | 27.80           | n.a.      | 791.678       | 455.772         | 49.98         | n.a.   | BMB* |
| 2      | 31.23           | n.a.      | 676.558       | 456.121         | 50.02         | n.a.   | BMB* |
| Total: |                 |           | 1468.237      | 911.893         | 100.00        | 0.000  |      |

b

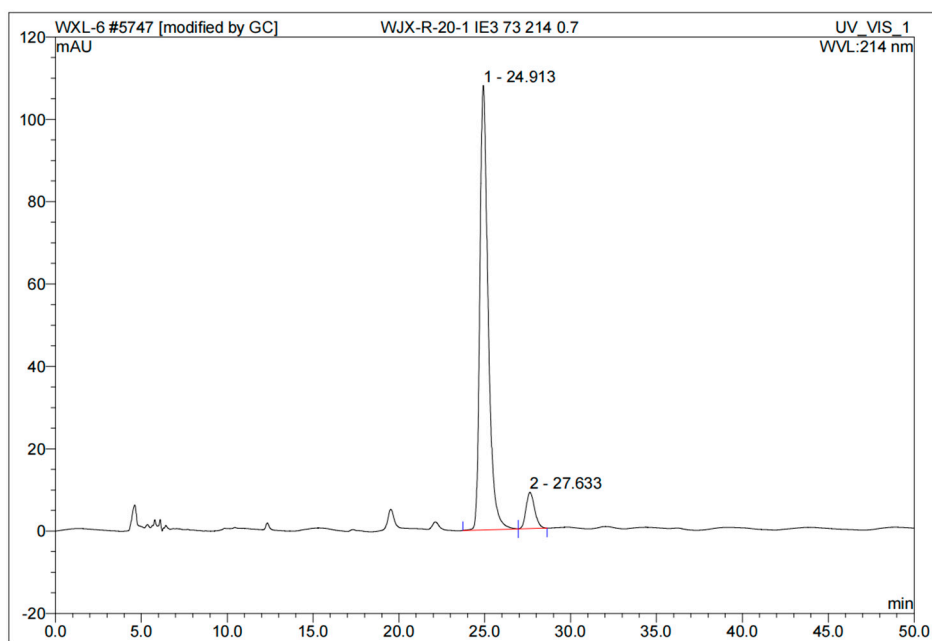

| No.    | Ret.Time<br>min | Peak Name | Height<br>mAU | Area<br>mAU*min | Rel.Area<br>% | Amount | Type |
|--------|-----------------|-----------|---------------|-----------------|---------------|--------|------|
| 1      | 24.91           | n.a.      | 107.967       | 60.603          | 92.17         | n.a.   | BM   |
| 2      | 27.63           | n.a.      | 8.897         | 5.145           | 7.83          | n.a.   | MB   |
| Total: |                 |           | 116.864       | 65.748          | 100.00        | 0.000  |      |

Figure S123. The HPLC data of **2x** in Scheme 2.

7. The HPLC data of **3** in Scheme 3.

a

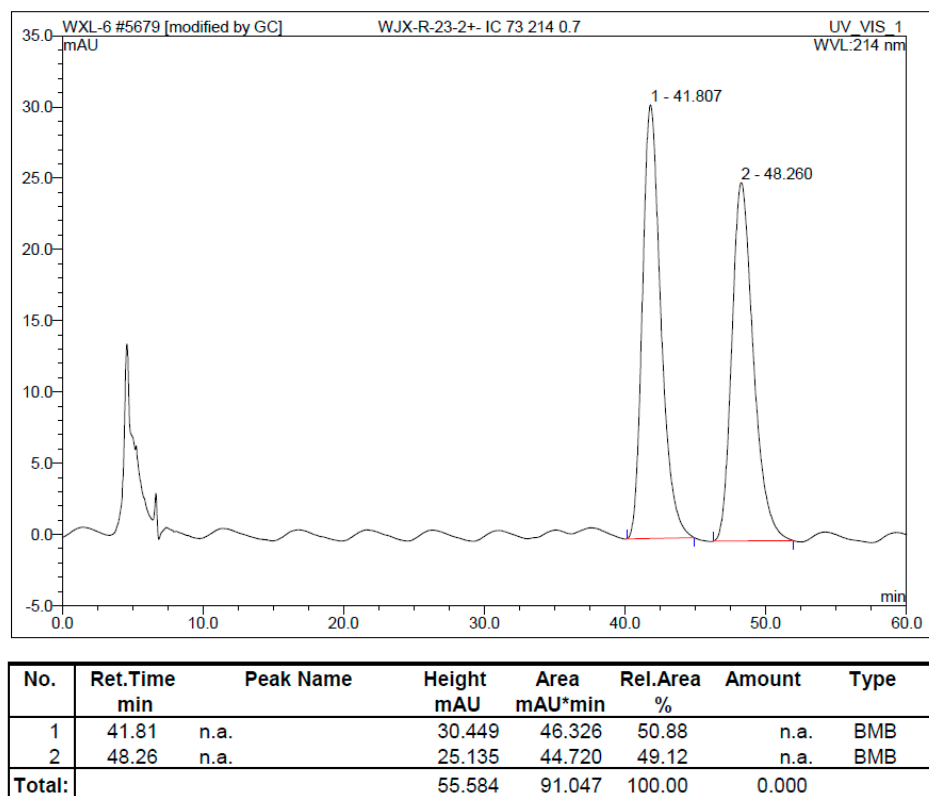

b

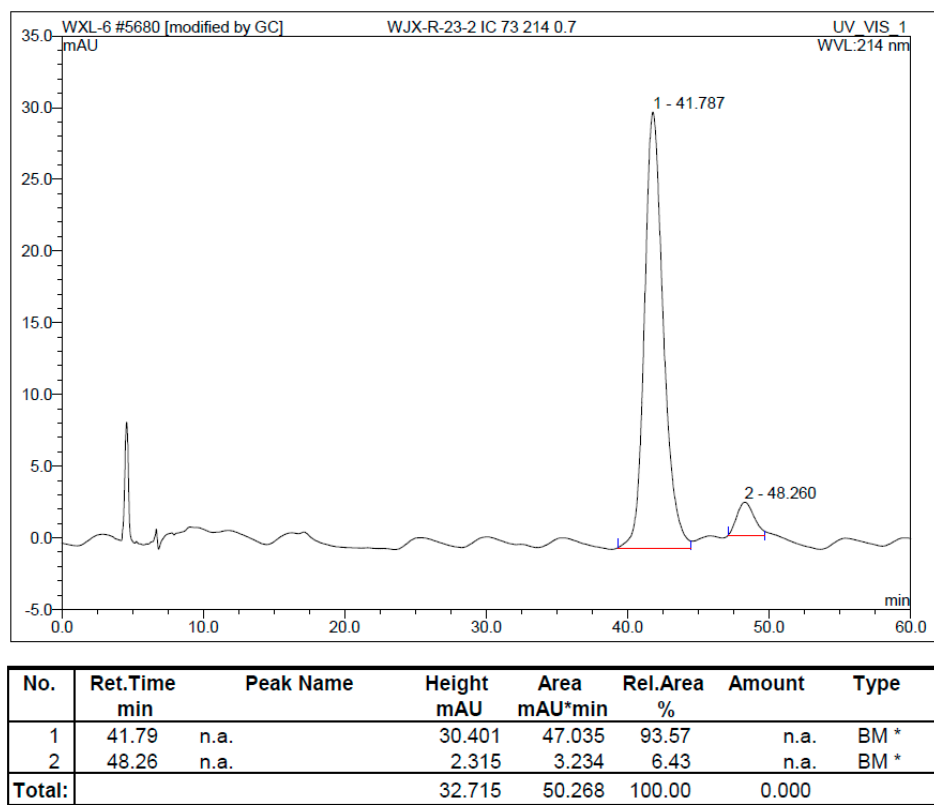

Figure S124. The HPLC data of **3** in Scheme 3.

a

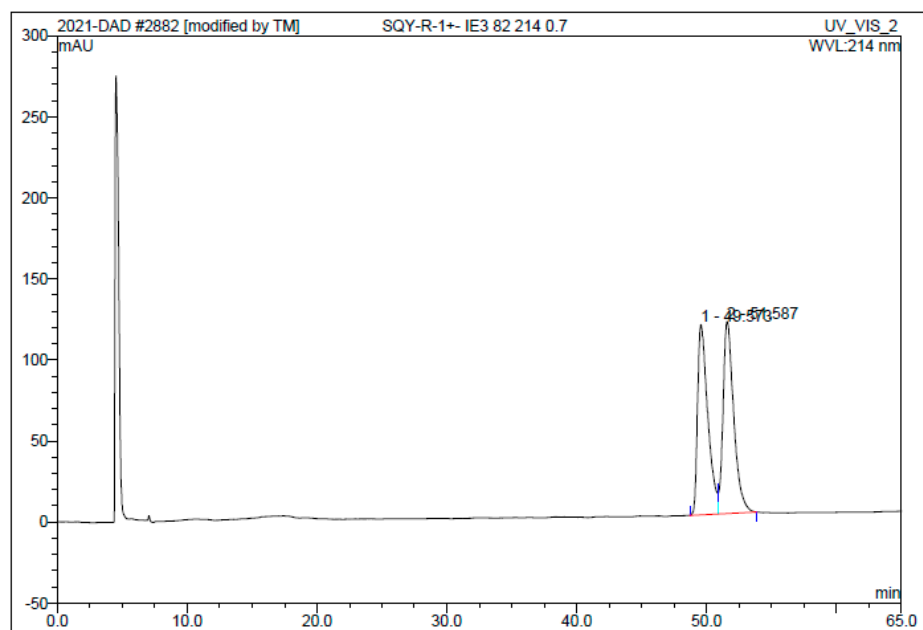

| No.    | Ret.Time<br>min | Peak Name | Height<br>mAU | Area<br>mAU*min | Rel.Area<br>% | Amount | Type |
|--------|-----------------|-----------|---------------|-----------------|---------------|--------|------|
| 1      | 49.57           | n.a.      | 117.267       | 107.068         | 48.45         | n.a.   | BM   |
| 2      | 51.59           | n.a.      | 118.407       | 113.926         | 51.55         | n.a.   | MB   |
| Total: |                 |           | 235.674       | 220.995         | 100.00        | 0.000  |      |

b

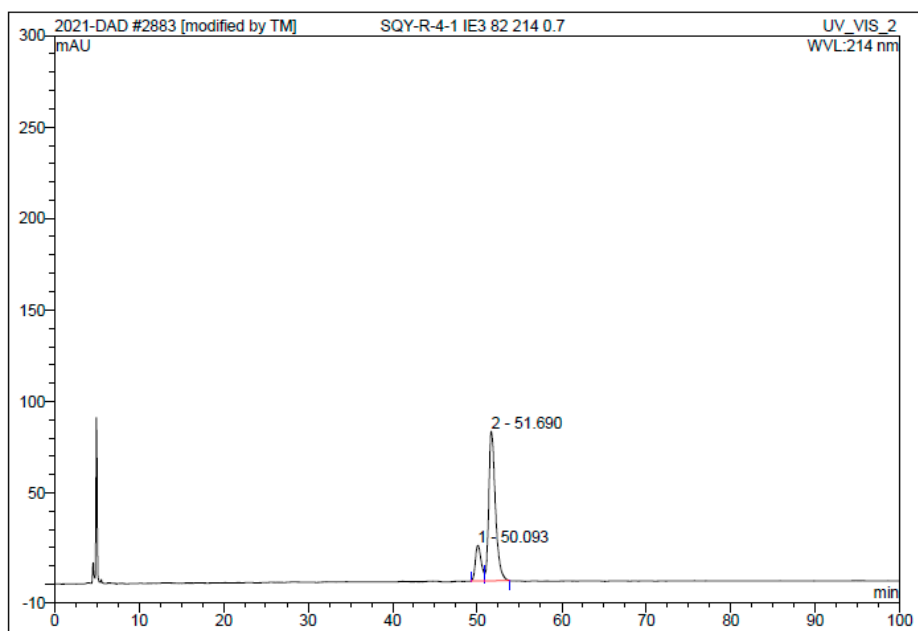

| No.    | Ret.Time<br>min | Peak Name | Height<br>mAU | Area<br>mAU*min | Rel.Area<br>% | Amount | Type |
|--------|-----------------|-----------|---------------|-----------------|---------------|--------|------|
| 1      | 50.09           | n.a.      | 19.370        | 15.584          | 17.26         | n.a.   | BM   |
| 2      | 51.69           | n.a.      | 81.758        | 74.695          | 82.74         | n.a.   | MB   |
| Total: |                 |           | 101.128       | 90.279          | 100.00        | 0.000  |      |

Figure S125. The HPLC data of **1v** in Scheme 3.

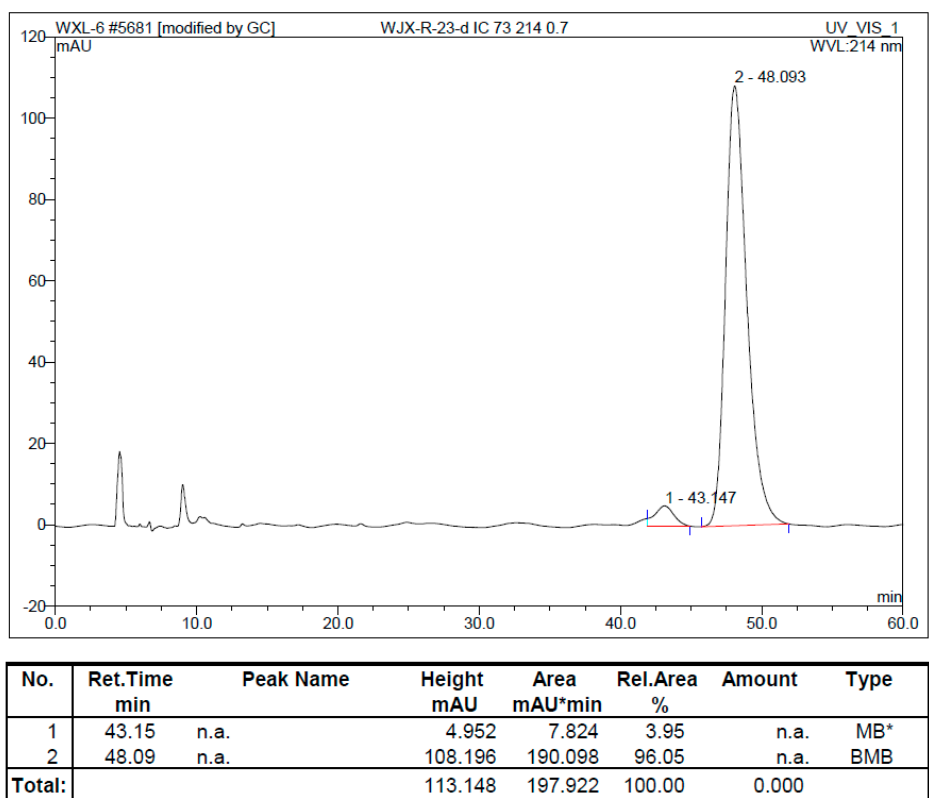

**Figure S126.** The HPLC data of **4** in Scheme 3.
